# Supplementary material for: Genes with 5′ terminal oligopyrimidine tracts preferentially escape global suppression of translation by the SARS-CoV-2 Nsp1 protein
Source: RNA. 2021 Sep;27(9):1025–45. doi: 10.1261/rna.078661.120 (PMC8370740; doi:10.1261/rna.078661.120)
Supplement: Supplemental Material [file supp_078661.120_Supplemental_Files.xlsx]

## Sheet: Supplementary file _1
For Cloning of IRES-TagBFP
	IRES_TagBFP_F	TCCGCAGTTTGAAAAGTAAGCCCCTCTCCCTCCCCCCC
	IRES_TagBFP_R	CAGAGGTTGATTGTTCCAGATTAATTAAGCTTGTGCCCCAGTTTGCTAGGG
For 5' UTR oligos
	EEF2_F	AGCTGGTTTAGTGAACCGTCCTCTTCCGCCGTCGTCGCCGCCATCCTCGGCGCGACTCGCTTCTTTCGGTTCTACCTGGGAGAATCCACCGCCATCCGCCACCGCTAGCCACCATGACTTCGA
	EEF2_R	TCGAAGTCATGGTGGCTAGCGGTGGCGGATGGCGGTGGATTCTCCCAGGTAGAACCGAAAGAAGCGAGTCGCGCCGAGGATGGCGGCGACGACGGCGGAAGAGGACGGTTCACTAAACCAGCT
	RPS12_F	AGCTGGTTTAGTGAACCGTCCTCTTTCCCTGCCGCCGCCGAGTCGCGCGGAGGCGGAGGCTTGGGTGCGTTCAAGATTCAACTTCACCCGTAACCCACCGCCGCTAGCCACCATGACTTCGA
	RPS12_R	TCGAAGTCATGGTGGCTAGCGGCGGTGGGTTACGGGTGAAGTTGAATCTTGAACGCACCCAAGCCTCCGCCTCCGCGCGACTCGGCGGCGGCAGGGAAAGAGGACGGTTCACTAAACCAGCT
	SLC25A6_F	AGCTGGTTTAGTGAACCGTCCCTTTCGGTCCAGGCGGCGGCAGGGCTGAGCCAGCGACGCCCTCCATTCACTCTCCGCGCCCGTTCTCCGGCTGTCCTCCCGTTCCGCTGCCCGCCCTGCCACC GCTAGCCACCATGACTTCGA
	SLC25A6_R	TCGAAGTCATGGTGGCTAGCGGTGGCAGGGCGGGCAGCGGAACGGGAGGACAGCCGGAGAACGGGCGCGGAGAGTGAATGGAGGGCGTCGCTGGCTCAGCCCTGCCGCCGCCTGGACCGAAAGGGACGGTTCACTAAACCAGCT
	ACTB_F	AGCTGGTTTAGTGAACCGTCACCGCCGAGACCGCGTCCGCCCCGCGAGCACAGAGCCTCGCCTTTGCCGATCCGCCGCCCGTCCACACCCGCCGCCAGCTCACCGCTAGCCACCATGACTTCGA
	ACTB_R	TCGAAGTCATGGTGGCTAGCGGTGAGCTGGCGGCGGGTGTGGACGGGCGGCGGATCGGCAAAGGCGAGGCTCTGTGCTCGCGGGGCGGACGCGGTCTCGGCGGTGACGGTTCACTAAACCAGCT
For pRL_CMV_fragment
	pRL_CMV_F	GCAGTACATCAAGTGTATCATATGCCAAGTCCGCCCCCTA
	CMV_R_EEF2	CGGCGACGACGGCGGAAGAGGACGGTTCACTAAACCAGCT
	CMV_R_RSP12	CGGCGGCGGCAGGGAAAGAGGACGGTTCACTAAACCAGCT
	CMV_R_SLC25A6	CCGCCGCCTGGACCGAAAGGGACGGTTCACTAAACCAGCT
	CMV_R_ACTB	GCGGACGCGGTCTCGGCGGTGACGGTTCACTAAACCAGCT
For TOP_reporter mutants
	pRL_CMV_EEF2_mutant_F	aggGCCGTCGTCGCCGCCATC
	pRL_CMV_EEF2_mutant_R	tctcGACGGTTCACTAAACGAGCTCTGCTTATATAG
	pRL_CMV_RPS12_mutant_F	agggTGCCGCCGCCGAGTCGCG
	pRL_CMV_RPS12_mutant_R	ttctcGACGGTTCACTAAACGAGCTCTGCTTATATAGACCTCCC
	pRL_CMV_SLC25A6_mutant_F	ggaaagGGTCCAGGCGGCGGCAGG
	pRL_CMV_SLC25A6_mutant_R	GACGGTTCACTAAACGAGCTCTGCTTATATAGACCTC
RT-qPCR	Renilla luciferase_F	GGAATTATAATGCTTATCTACGTGC
	Renilla luciferase_R	CTTGCGAAAAATGAAGACCTTTTAC
	Firefly luciferase _F	CGGAAAGACGATGACGGAAA
	Firefly luciferase _R	CGGTACTTCGTCCACAAACA
Renilla _5'RACE _GSP	5'GATTACGCCAAGCTTCCGCGCTACTGGCTCAATATGTGGCACAAC3'

## Sheet: Supplementary file_2
HEK293T	NSP1-1	NSP1-2	NSP1-3	NSP2-1	NSP2-2	NSP2-3	Unt-1	Unt-2	Unt-3
Total reads	116464609	104981553	144166852	112019926	113938015	104891811	67130099	126846131	91286251
Clipped reads	113384932	102015504	139782825	109208991	111098932	102114515	65108043	123219311	87305717
rRNA & tRNA	87041208	77529087	100945362	72780119	75552836	73743421	47869389	89514093	64289239
non rtRNA	26343724	24486417	38837463	36428872	35546096	28371094	17238654	33705218	23016478
Transcriptome aligned once	13574807	11138276	18518550	19459022	17875026	14507361	9104285	18963737	12275845
Usable Reads After UMI Dedup	12503413	10390514	16772718	17989686	16564558	13487211	8527167	17504702	11440519
NCI-H1299	NSP1-1	NSP1-2	NSP1-3	NSP2-1	NSP2-2	NSP2-3
Total reads	38093021	88700834	41500514	82690639	53850110	60473282
Clipped reads	34535469	79771999	37502320	74707197	48496132	54348002
rRNA & tRNA	27067058	61534208	27887407	52668153	35442049	35985005
non rtRNA	7468411	18237791	9614913	22039044	13054083	18362997
Transcriptome aligned once	3463543	8309365	4197524	11610163	7081366	10248040
Usable Reads After UMI Dedup	3181042	7381997	3822683	10638772	6549647	9271966

## Sheet: Supplementary file_3
Gene
SBDS-201
RPL35A-206
ENO1-213
DSG2-201
CCT3-201
RUVBL2-206
ACTR2-201
PSMD7-201
MRPL20-201
ACTR10-201
GNL2-201
DEGS1-201
FABP5-201
TRMT112-206
MRPL47-203
PPIF-201
CTSC-201
MARCKS-201
SLC25A6-201
TOMM7-201
RPL41-204
CAPZB-201
HIST1H2AI-201
CISD2-201
TUBA1C-201
DHX15-201
SLBP-206
POLR2L-201
NDUFA5-201
DHX9-201
TXNL1-201
IPO7-201
MRPL42-206
FARSA-201
FAM162A-203
IDI1-203
H3F3B-201
CUL4B-204
PTOV1-201
GAL-201
JPT1-203
NDUFB11-202
HMGN2-201
PDHA1-206
SNX3-201
BTF3-201
EIF1AX-202
NCBP2-201
CLIC4-201
PSMD1-201
HSD17B12-201
NOC2L-201
RTN4-205
CYP51A1-201
EIF4G1-202
NRAS-201
MRPL3-201
RDX-201
PPAT-201
CHCHD7-202
ERH-203
UBE2A-202
CHMP5-201
TMPO-202
CKAP4-201
XRCC5-202
LSM5-208
RPA3-201
IDH3B-201
CCDC59-201
RER1-209
RPLP0-219
LUC7L3-208
UBE2L3-201
TM9SF2-206
COMMD4-201
PRDX1-201
MAPK1IP1L-201
RPL31-201
C4orf3-202
SF3B3-201
DDX6-208
MRPL15-201
PRKDC-201
OAT-201
PRPF40A-213
SRPRB-201
ZMPSTE24-201
SNX5-202
LIPA-202
RPS13-202
RPL5-208
TCP1-201
ATP5MC2-208
NDRG1-202
RFC5-204
PFDN2-201
SND1-201
RDH11-201
HIST1H3B-201
NEDD8-201
CDK4-201
C8orf59-213
SRM-201
PPP2R1A-201
NDUFA10-201
PPP2R2A-202
POMP-201
HACD3-201
ELAVL1-201
PYGL-201
PPM1G-201
HIST1H2AM-201
ELOB-203
ERLIN2-201
NDUFA6-202
WDR77-201
ATP5PF-204
EIF5A-202
EIF2S2-201
SEC23A-201
ATP5ME-201
NDFIP2-205
CNIH4-205
ATP6V0B-205
TMX1-201
GRINA-201
ZRANB2-202
RNF181-201
HNRNPA1-203
HIST1H2AB-201
NMD3-202
BZW1-203
ATP6AP2-217
RBM8A-204
SRSF5-203
NDUFC1-211
MPC1-202
PAICS-207
DYNLT1-203
TKT-208
PABPC4-202
HNRNPK-204
HIST1H3H-201
GEMIN6-201
MRPS33-201
CALM1-201
GADD45GIP1-201
FDPS-201
ACTR3-201
ACAT1-201
LIN7C-201
PSMD11-201
DIS3-201
EZR-202
TSPYL1-201
MRPL40-201
H2AFZ-201
PGRMC1-201
MRPL51-201
SAMM50-201
HIST1H4C-201
TIPIN-201
SSBP1-210
HSD17B10-201
ATP6V0E1-203
PRPF19-201
TIMMDC1-208
CFL1-203
HIST1H2BJ-203
PRPS1-204
ARHGDIA-201
ATP6V1F-201
SNX2-201
HSPA5-201
YWHAB-202
SPCS1-205
RPL21-202
SAP18-208
CEBPZOS-204
IRS4-201
SRP14-201
ME2-201
C1QBP-201
CAPRIN1-201
CDK1-203
DAZAP1-201
NUP43-201
AHCY-201
HNRNPDL-208
HNRNPM-201
HTATSF1-204
RPL30-209
SFT2D2-201
NACA-201
RAB10-201
RPL24-201
PNO1-201
SNRPD1-201
ENSA-208
THOC7-201
ABCE1-201
AHCYL1-202
HIST1H4E-201
SKP1-202
ATP5F1C-201
CDC5L-201
SSR2-201
HDDC2-202
THOC3-201
RPS7-205
PABPC1-201
RPS11-201
RPL26-209
SERPINF1-201
EIF3F-208
HMGB1-203
WDR61-201
YTHDF2-201
PBK-201
NSUN2-201
CCNB1-201
SDHB-201
BUD23-201
STAG2-205
NDUFB6-203
KRR1-201
SNRPD3-201
CFAP20-201
PRDX6-201
SRSF6-201
UQCRQ-203
IARS-202
PITPNB-202
KHSRP-201
PSMB5-202
CSE1L-201
DCTPP1-201
RCN2-203
JUN-201
RPL27-206
NCKAP1-201
H1F0-201
SERP1-203
PHB-214
AHSA1-201
TUFM-201
SNRPB2-201
RPL8-201
RPS23-201
RPL38-201
CCDC58-201
FUBP1-203
KCTD12-201
SRP9-201
ZCCHC12-201
TCEAL9-203
DYNLL1-203
NDUFA4-201
COX6C-205
UBQLN1-202
STOML2-201
BRD2-201
RECQL-204
TMEM41B-204
RPS21-201
CYB5B-201
DDX18-201
AP2M1-202
SIGMAR1-201
MRPS36-201
MRPS7-201
CAPZA1-201
EIF2S3-201
CHORDC1-201
RPS27L-201
RPS15A-201
COX6B1-201
DDX47-202
PCBP2-207
HDGF-201
PMPCA-201
VMA21-201
BTF3L4-201
BLMH-201
PA2G4-201
MRPS34-202
RPL19-201
CHTOP-204
LAMTOR4-201
GARS-201
DFFA-202
TRMT10C-201
NAP1L4-201
ETF1-201
BANF1-201
NUP107-201
SELENOF-201
RPS10-206
UBE2D2-202
PPIA-204
MGST1-204
NUDC-201
AMOT-201
AKIRIN2-201
RPL10A-201
ODC1-201
CALR-201
PTGES3-201
TIMM8B-204
MAT2A-201
PSAT1-202
FUCA2-201
IARS2-201
RPL15-201
MORF4L1-201
HSP90B1-201
NDUFAB1-205
BUB1-201
TMEM123-202
TARS-201
HSPA8-224
LDHB-203
HSPA4L-201
TIPRL-202
COPB1-201
APEX1-201
HNRNPH1-202
BIRC5-202
TXN-202
DDIT4-201
PTTG1-202
STRAP-202
CRABP2-204
MTHFD1-201
COX7B-203
SEPT2-204
TMEM30A-201
PPID-201
MRPL9-202
SPC25-201
LDHA-205
NDUFB1-201
HNRNPD-201
RPL32-204
DCTN2-201
CORO1C-201
PFDN1-201
MCM7-201
PGD-201
EMC3-201
CAND1-208
SNRPG-201
EPRS-201
COPS9-205
SYPL1-201
COPE-201
RBMX-201
USP14-201
CS-201
SNX6-201
UBE2N-201
DHCR24-211
MAPRE1-201
UTP11-201
TPI1-202
GLRX3-202
YWHAQ-202
SRSF9-201
EIF3L-214
NOL7-202
EIF3K-201
CTNNA1-201
ERP29-201
PPT1-219
CSTB-201
MRPL13-201
MDH1-201
RPL7L1-208
NDUFB9-201
RNF114-201
EEF1B2-203
MT-ND4L-201
MSN-201
SNRPC-201
UBE2E1-201
TMEM258-204
NDUFB3-201
ATP5MG-201
POLR2B-202
MT-ATP8-201
NAMPT-201
DNAJA1-201
ATP1B3-201
SLC1A5-203
COPS8-201
MRPS15-201
COPS2-202
SF3A3-201
NHP2-201
HNRNPA2B1-202
S100A11-201
FKBP4-201
HNRNPH2-201
LSM4-203
HNRNPL-201
WLS-201
CUL3-201
ATP1A1-201
RAB14-201
PSMB4-201
HDLBP-203
RPN1-201
VAMP3-201
ALDH18A1-202
GDI1-204
BEX4-202
HIST2H2BF-201
G3BP1-202
ARL6IP5-201
SDHC-202
LGMN-202
ARL1-201
HNRNPAB-202
H3F3A-201
TUBA1B-202
HIST1H2BD-201
NDUFA11-201
DHFR-201
TMEM14C-205
POLR3K-201
HPRT1-201
UQCRC1-201
YWHAE-201
MRPL32-201
KHDRBS1-202
RAB2A-201
RHOC-201
TSPAN3-201
MRTO4-201
DCAF7-205
TOMM70-201
SEC61B-201
REEP5-202
SARS-201
UCHL3-201
VRK1-201
CNN3-201
PTMA-201
RPL23A-204
RAD23B-201
EBP-205
PRKCSH-209
CCNA2-201
MAGT1-201
PFDN5-214
FKBP10-201
TIMM10-201
EEF1A1-202
FAF2-201
VDAC3-201
NANS-201
MYH9-201
SDCBP-201
HIST1H3J-201
CDC20-202
OLA1-201
RAN-212
PFN2-201
RFC4-202
RABGGTB-201
GTF2I-212
DDX21-201
ESD-202
LSM3-201
GSTP1-202
CDC37-201
EMD-202
ZC3H15-201
HMGCS1-201
KDM1A-201
COX6A1-201
CUL1-201
HIST3H2A-201
HIST1H4A-201
UBA2-201
TFG-201
NIPSNAP1-201
HNRNPC-219
DDX46-201
ACTL6A-202
CHCHD3-201
ELOVL5-201
MTHFD2-201
IK-201
RAB1A-203
POLR2H-208
CST3-203
TMEM59-201
PCBP1-201
NDFIP1-201
PSMD13-212
SEC62-201
MTCH2-201
RPL10-204
MYL6-218
STIP1-201
VCP-201
HNRNPA0-201
HDAC2-205
ARL6IP1-201
TIMM13-201
RPS26-201
UBL5-201
ADH5-201
METAP2-202
GNG5-201
ADSS-201
DDX3X-244
RPF1-201
ITGB1-202
CDC123-201
MZT1-201
TFAM-204
ATXN7L3B-201
SRP68-201
PCNA-202
RPS4X-201
RPF2-203
TCEAL4-209
GGH-201
NDUFV2-201
GMNN-201
ZNF24-201
TPR-201
RPS27-201
UCK2-201
SLC38A1-201
SURF4-202
RNPS1-216
CSDE1-203
EIF3M-208
UBC-205
SRRM2-201
MORF4L2-203
SRP54-213
VAPA-202
TNPO1-204
TRA2A-201
G3BP2-202
PSMA4-201
GNAI3-201
LAPTM4A-201
NDUFS5-202
VBP1-201
PRRC2C-201
ECI2-207
SNRPF-201
NUP37-209
SERINC1-201
ABRACL-201
TBCA-202
RPL27A-201
ARCN1-201
NAE1-201
RTCB-201
FTH1-201
FAM199X-202
SRSF7-201
HADHB-201
NUDT5-207
ALG8-201
RAP1B-201
CALM2-201
RPL9-214
HIST1H1D-201
PSMD12-201
ATP5PO-201
RPS3A-201
NDUFAF2-201
YWHAZ-206
USP22-201
SPCS2-201
RPL23-206
CTNNB1-241
ACADM-202
RBX1-201
PSMB2-201
TMEM9-201
CCT7-201
KPNA2-202
SEC11A-201
PSIP1-203
GSPT1-206
GMPS-203
CKB-201
IMPDH2-201
AURKB-214
LMAN1-201
SUB1-201
SLC25A3-203
AKR1B1-201
PCMT1-212
TOP1-201
MRPL22-207
MRPL23-205
SNRPB-201
PPIH-201
RPS14-202
SLC31A1-201
UAP1-201
HIST4H4-204
SLC3A2-203
LRRC59-201
LAMC1-201
RPS19-206
CANX-201
NPM1-201
CHCHD10-202
CD151-202
ATP6V1E1-201
RPL4-201
UBA52-202
DPY30-202
APLP2-201
TIMM23-201
NDUFA2-201
APRT-201
GAPDH-201
RAB5C-202
RNASEK-210
PSMC5-201
RBM39-201
RPL36A-209
SRSF2-203
RPL37-201
RUVBL1-201
AURKAIP1-203
GTF2H5-201
HIST1H4B-201
RSL1D1-204
SMARCB1-213
DEK-202
MCM2-201
PAFAH1B2-204
TMED10-201
TDG-202
SMC4-202
HIST1H4J-201
PSMA5-201
PHGDH-223
HNRNPA3-201
HSPD1-202
AASDHPPT-201
UQCRFS1-201
DSTN-201
NONO-201
AIFM1-201
EIF4EBP1-201
NUCB2-208
DAP3-202
UBE2T-201
ATP6V1G1-201
DDX17-203
TMSB10-201
ATP5F1E-201
CXorf56-204
TALDO1-201
VPS25-201
FHL1-218
INSIG1-201
CCDC124-203
H2AFY-217
TIMM8A-201
TMEM126B-201
DCTN3-201
SHMT2-201
HSD17B4-201
PPP5C-201
CPSF3-201
TPT1-212
GPI-220
ACSL3-201
GABARAPL2-201
RAB21-201
STT3B-201
HIST1H2BK-201
MYC-206
SSRP1-201
PRMT5-202
RPS5-202
CSNK2A2-201
SNRPA-201
GRB2-203
EIF3A-201
SFT2D1-201
SNRNP200-201
DPM1-203
SQLE-201
ANP32A-203
GART-204
MRPS27-201
RPS25-202
CETN3-201
SRPK1-204
PAFAH1B1-202
PARK7-209
SMC3-201
PLRG1-202
SF3B1-201
MYL12A-201
PFN1-201
CDKN2A-214
MRPS18C-201
TXNDC17-201
RANGAP1-207
HIST1H2AC-202
MCMBP-201
MGST3-205
AP2S1-201
YBX1-201
EIF4A3-201
SEM1-201
VIM-209
CLNS1A-204
APP-201
CBX1-202
MSMO1-201
SUCLG1-201
SNW1-201
HLA-C-201
PWP1-201
EXOSC8-202
CDH2-201
ATP5PB-202
SRSF3-202
VPS26A-202
VPS29-206
QKI-203
SNRPD2-201
RPL35-201
MT-CO2-201
BCLAF1-214
UBE2M-201
EIF3G-201
RPLP1-201
RFC3-201
FARSB-201
DNAJC8-201
GINS2-201
CBX5-201
PRELID1-201
UFM1-201
OST4-203
SYNCRIP-202
UBE2C-204
GLA-201
RRM1-201
HM13-202
NDUFB2-212
SEC63-201
LTA4H-201
CITED1-201
RARS-201
COPA-201
NASP-202
HSPA9-214
PSMA7-203
ZNF326-201
TMSB4X-203
HIST1H2AH-201
CAP1-203
COPB2-201
PEBP1-201
HSPA4-201
DNAJC7-203
ZMAT2-201
POLDIP2-201
HMGN5-201
MRPL4-201
KDELR2-201
DYNC1H1-201
ROMO1-204
CHCHD1-201
NUP155-201
UBE2K-201
DCTN4-203
MRPS23-201
TMED9-201
MMADHC-203
USO1-204
MTREX-201
ST13-201
SINHCAF-201
PPP4C-201
ATF4-201
AARS-201
NOP10-201
ACTR6-201
SSR3-201
CCNB2-201
COX7C-203
LAMTOR2-203
RHOA-202
SAE1-201
MDH2-201
NDUFS1-201
HIST2H2BE-201
ACTR1A-201
PPIB-201
MAD2L1-201
PDIA3-201
ATP6V1A-201
DCUN1D5-201
CCDC47-201
RSL24D1-201
ATP5IF1-201
CDC27-201
FEN1-201
HNRNPU-205
MCCC2-201
MCM4-201
PSMD4-202
RPL13A-201
XPO1-201
KPNA4-201
SF3A1-201
POLE3-202
TSN-201
SUMO1-203
NAP1L1-227
ELOC-210
SUMO2-202
PSMC3-213
PSMB6-201
SNU13-202
CXorf57-202
ANAPC11-211
MRPS9-201
GPN3-201
RPS3-217
PPP1CC-201
NUTF2-201
SLC16A1-207
PSMD3-201
TFRC-201
EFTUD2-202
SCOC-203
SKA2-201
CCT4-201
RPL18-208
PDHB-201
MRPL28-211
RNF138-202
RPL22-201
RPL17-205
MOB1A-201
MAGOHB-201
CD63-208
ELP2-203
TOP2A-201
COPZ1-201
EIF5B-201
MRPS10-201
RPS24-202
CKS2-201
MAPK1-201
IGF2BP1-201
HMGCR-201
SMS-202
ZWINT-203
PSMD14-201
WARS-202
RPS27A-201
GNL3-202
GDI2-203
CCT8-201
GRSF1-201
MYL12B-203
PDAP1-201
POLR2K-201
NSDHL-201
CCT5-201
SF3B4-201
EIF4A2-201
PFDN6-204
XRCC6-201
RPL36AL-201
SFXN1-201
HIST1H4D-201
RPRD1A-202
PPP1R14B-201
AIMP1-203
SUPT16H-201
SMARCC1-201
PMPCB-201
ID3-201
EBNA1BP2-201
UBA1-201
UQCR10-201
UFC1-201
MCFD2-202
BSG-201
SERPINH1-202
MAGED2-206
KIF5B-201
ANXA2-202
HMGB3-201
H1FX-201
MRPS25-201
YME1L1-203
API5-201
NOP58-201
PDCD6IP-201
SMARCA5-201
ACLY-201
H2AFX-202
METTL5-201
HNRNPR-202
RPL22L1-201
PSMC1-201
PPP1CB-203
USP9X-201
MYH10-201
MRPS22-212
NDUFA8-201
DR1-202
ASNS-201
CPSF2-201
CTPS1-202
HIST1H4H-204
UQCC2-204
NDUFA12-201
PRDX5-201
COPS3-201
FASN-201
HDAC1-201
FUS-201
RPL11-206
COX7A2-201
EID1-201
UQCRB-201
CAPZA2-201
PHF5A-201
ENY2-211
NDUFS3-201
MRPS2-202
SNRNP40-201
SNRPE-202
CFL2-201
CCT2-201
GANAB-202
HIST2H2AC-201
CDC6-201
VPS35-201
TAF15-215
TAGLN2-203
RPS12-201
PHB2-203
TECR-201
TRAPPC1-201
P4HB-201
PEF1-201
PDCD10-201
SEC22B-201
PRDX2-201
RPLP2-201
GJA1-204
PET100-202
NAXE-203
RPA1-201
DARS2-201
NDUFS7-201
BZW2-207
GNB1-209
PSMA3-201
ZNF207-201
PRPS2-202
AAMP-201
PRDX4-202
TOMM20-201
ETFA-203
SEC61A1-201
PDIA6-201
PTBP1-201
MRPS35-201
PPP6C-201
EIF1-203
LAPTM4B-203
GOLT1B-201
BCCIP-203
CNIH1-201
MCM6-201
DMAC1-201
STMP1-202
TMBIM6-201
PRKAR1A-203
ANXA5-201
HMGN1-204
HELLS-202
TOMM5-201
STT3A-201
PRIM1-201
TOP2B-204
NOL11-201
EIF3I-202
MRPL17-201
TROVE2-205
THRAP3-201
LSM8-201
MRPS16-202
FBL-201
RNASEH2A-201
DDX24-209
PGAM1-201
CSNK1A1-202
MYDGF-201
TRIM28-201
HIST1H2BO-201
PSMD2-201
HIST1H2BF-201
SERF2-203
ATP5F1B-201
PRDX3-201
ACTB-201
RPS29-205
NDUFC2-201
PTCD3-201
CPVL-203
MRPL19-202
GSTM3-201
ACAT2-201
SCD-201
MDK-205
RAP1A-202
DYNLRB1-202
NUP205-201
LAMP2-202
NDUFB10-201
B2M-204
DUT-201
SF1-202
NDUFAF4-201
PSMD6-201
PSAP-202
DKC1-201
PSMC4-201
NAA10-208
PDIA4-201
ENAH-204
COX4I1-203
TCEAL8-202
PMAIP1-202
RPS18-230
HIST1H2AG-201
DNAJA2-201
UXT-201
NCL-201
ATOX1-207
ITM2B-202
HADHA-201
CFAP298-201
EIF3E-201
HIST1H2BN-204
PSMB7-201
TMCO1-202
ERP44-201
XPOT-201
PES1-202
CLINT1-201
CTSL-203
YWHAG-201
TMEM50A-201
SC5D-201
SLC7A5-201
HSP90AB1-202
NDUFB4-201
HIST1H2AL-201
UTP18-201
CERS2-201
COA6-201
ATP2A2-204
SEC13-202
VTA1-202
MRFAP1-201
CSRP2-201
NAA50-201
EXOSC2-204
IDH3A-201
COX7A2L-202
EIF3D-201
MRPL52-203
RPL14-201
SFPQ-201
ATP5MPL-209
LMAN2-201
STK26-202
RTRAF-201
KDELR1-201
RPS28-203
RPS20-208
PLS3-202
BCAP31-201
HIST1H1C-201
PSMD8-201
PIN4-203
SSB-202
DRG1-201
C11orf58-201
PNP-201
EWSR1-206
PHF6-201
POLR2G-201
RPL18A-201
GNB2-201
ILF2-201
TRA2B-205
NUP133-201
ATIC-201
ANAPC5-201
RPL34-203
MRPL39-202
ID2-201
UBE2S-201
RPL12-201
TMED5-202
SDHD-201
PGK1-201
CLTC-201
LSM12-204
PRELID3B-201
SF3B6-201
LRPPRC-201
ATP5MF-203
FAR1-201
RPS16-201
SLC25A5-201
PHPT1-201
CYB5R3-201
SF3B2-201
PRPF8-205
CENPW-203
RPL13-201
SLIRP-209
CKAP2-201
TRAP1-201
ILF3-219
PCBD1-201
TUBB-205
ATP5MC1-202
RPS15-209
OCIAD1-202
AK2-201
ARPC2-201
RPN2-201
MRPS18B-206
MSH6-201
EIF3B-201
EIF6-203
CD164-202
GRHPR-201
MRPL37-202
SLC25A11-201
SRI-201
HIST1H2AE-201
HACD2-201
VDAC1-201
HINT1-201
PSMG1-201
PSMB3-211
HAT1-201
SOD1-201
NDUFAF3-202
OTUB1-209
ACTG1-210
SMU1-201
ABHD10-201
NCAPG-201
TMA7-201
GLO1-201
UTP6-201
NUDT21-201
NDUFB5-201
RPL26L1-206
POLR2A-201
YARS-201
LY6E-207
CACYBP-201
PGRMC2-207
NPEPPS-201
DENR-201
PFDN4-201
ARPC3-201
PDCD5-207
SET-201
DDOST-202
TPGS2-201
RACK1-227
RCC2-202
HIST1H3A-201
MTA2-201
SERBP1-203
ATP5MD-205
CISD1-201
UBE2V2-207
SEPT11-201
CUTA-215
PSMF1-203
PPA2-201
TTC1-201
MPC2-202
HSBP1-201
SDHA-201
SNRPA1-201
RHEB-201
RBBP7-203
CLTA-201
NDUFS6-201
ATP6AP1-201
TOMM22-201
RPL39-201
ARF4-201
BRK1-201
DNAJB6-204
CD81-201
DDB1-201
PPP1CA-203
KPNB1-201
DDX52-213
ATP5F1D-201
ATXN10-201
MRPL16-201
ATP6V0D1-201
CALM3-201
OSTC-201
TRIP13-201
ARF1-214
GOT2-201
TIMP1-201
CKS1B-201
MRPL21-201
TXN2-201
EEF1A2-201
EEF2-201
CBX3-201
DNAJB11-202
RAD21-201
CD99-205
STC2-201
SRP72-201
HEATR1-203
SEC61G-203
HMGA1-205
ANXA6-201
POLR2E-213
H2AFV-202
TRAM1-201
PSMD10-201
MRPS21-201
MRPL41-201
WDR75-201
KIF11-201
IMMT-204
MTPN-201
EIF4B-201
IPO5-202
ACOT13-201
HNRNPH3-201
HYPK-201
ATP5MC3-201
SLC38A2-201
AIMP2-201
MCM5-201
HIST2H2AB-201
HEBP2-204
HLTF-201
MRPL18-201
PAIP2-202
TSR1-201
BCAT1-201
HMGB2-201
DCAF13-208
TMED2-201
RPL29-202
BEX3-204
RPA2-203
YBX3-201
IDH3G-201
DARS-201
ECHS1-201
RFC2-201
NRDC-202
UBE2D3-210
C1D-201
SPDL1-201
CA2-201
MCTS1-202
HIST1H3F-201
ITGB3BP-201
PSME3-210
RBBP4-202
ATP5F1A-202
SYAP1-201
HNRNPF-204
RPS6-204
RAB1B-201
BRIX1-201
CETN2-201
HMMR-202
NDUFA1-201
PLK1-201
MARCKSL1-201
CKAP5-210
GNB4-201
STMN1-203
SSR1-201
CNBP-201
NIFK-201
SPCS3-201
FAU-207
EIF4E-203
LBR-202
DLAT-201
ATP5PD-201
RAB7A-201
COX5A-201
GSTO1-202
RAC1-202
PPA1-202
RPL7A-202
RANBP1-201
ABCD3-202
MAGOH-202
CCNG1-201
MLF2-201
PSMB1-201
RPL6-202
C5orf15-201
CALU-202
DHCR7-201
TIMM17B-201
MAGED1-203
FXR1-202
NPM3-201
PSMC6-201
AP2B1-217
BUB3-203
SAR1A-205
COX17-201
RPS9-201
UCHL1-201
GHITM-201
CAPNS1-201
ARPC5-202
MIF-201
U2AF2-201
COX5B-201
C19orf53-202
NOP56-201
RPL37A-210
RBM3-203
PERP-201
RPS2-201
HSP90AA1-201
TSPAN6-201
NTPCR-202
YWHAH-201
MMGT1-201
NDUFS2-201
ALDH9A1-201
ANP32B-201
FKBP3-201
EIF5-201
PDLIM1-201
HIST3H2BB-201
LRPAP1-202
SRRM1-201
FAM216A-201
S100A10-202
WDR43-202
MT-ND5-201
EDF1-201
MPHOSPH6-201
MT-ATP6-201
MSH2-201
MRPS14-202
GLUL-201
VDAC2-203
SF3B5-201
ANP32E-208
PSMC2-203
TUBB4B-201
SLC7A1-201
PKM-202
PDCD4-201
SRSF10-214
ATAD1-201
NARS-201
NUCKS1-201
TMEM97-201
CD9-203
BCAS2-201
PUF60-208
DAD1-201
NSA2-205
NOLC1-209
MRPL24-201
HSPA13-201
SMC2-201
NDUFS4-201
RPSA-201
ACTN4-201
CPNE3-203
FH-201
HIST1H2BL-201
NAA15-201
UBAP2L-207
RRP7A-201
PPP2CA-203
RFK-201
ALYREF-202
GRPEL1-201
TIMM17A-201
LMNB1-201
CDC7-203
PIGK-202
EIF4H-202
LSM7-201
HADH-201
UCHL5-206
DBI-202
SLC39A6-201
SSR4-201
SMNDC1-202
UQCRC2-201
RPL3-201
IDH1-203
UBE2I-202
CCT6A-201
KARS-201
TPM3-210
CYC1-201
ERO1A-201
MCM3-207
SEPT7-201
FSTL1-201
NDUFS8-201
TPM4-222
TYMS-203
YIPF4-201
RPL36-203
SMC1A-201
DDX1-202
RAB11A-201
HIST1H2BC-201
HSPE1-201
GTPBP4-202
COPS4-201
CYCS-201
TPX2-201
NME1-203
PRMT1-201
NDUFA3-214
CHCHD2-201
TM9SF3-201
PARP1-203
EIF3H-209
HSPH1-201
DERL1-201
MARS-201
SNRNP70-206
HNRNPUL1-204
EIF2S1-201
ACP1-201
RPL28-201
GNAS-210
UFD1-201
CLIC1-207
U2SURP-208
COPS6-201
UBB-201
RPS8-202
NCBP1-202
HIGD2A-201
RPL7-201
HIGD1A-201
DLD-201
FDFT1-224
LARS-202
DDX5-201
HIST1H1E-201
WDR3-201
TMEM33-203

## Sheet: Supplementary file_4
genes	logFC	logCPM	F	PValue	FDR
ETV5-201	-3.2338	2.10879	38.7267	6.06076e-09	8.79952e-07
CHAC1-204	-3.06823	2.71991	29.7792	2.32566e-07	2.08022e-05
EGR1-201	-3.03045	3.80094	128.535	3.35237e-21	1.39934e-18
MGAM-202	2.79998	1.34502	23.7389	3.1659e-06	0.000188786
QRICH2-201	2.47114	1.93039	26.8798	7.97033e-07	5.786e-05
SYNPO-201	-2.3696	1.59399	6.79229	0.0102119	0.0884207
MALT1-202	-2.22774	4.80061	50.3617	7.15324e-11	1.49294e-08
COMMD10-201	-2.17996	1.87382	11.2035	0.00106505	0.0187188
CTGF-201	2.17202	1.65716	15.4951	0.000133437	0.00385236
ERCC-00062	2.12224	8.63575	794.634	1.41879e-57	3.55335e-54
ERCC-00019	2.08043	6.29777	327.459	1.6972e-37	1.54568e-34
ERCC-00092	2.06596	9.95229	866.403	1.04506e-59	5.23471e-56
ERCC-00144	2.05061	5.91083	264.199	3.00042e-33	2.31217e-30
NAPB-201	2.04641	1.88131	16.954	6.72627e-05	0.00216668
ERCC-00170	2.03761	7.11474	444.877	5.13823e-44	5.14748e-41
ERCC-00131	2.03302	8.56904	769.869	8.44269e-57	1.20827e-53
ERCC-00108	2.02433	11.0263	899.04	1.25768e-60	1.25995e-56
ERCC-00028	2.02047	4.44684	94.5426	3.62933e-17	1.29852e-14
ATF3-202	-2.01907	4.91339	122.535	1.57361e-20	6.30578e-18
ERCC-00136	2.01862	13.5412	775.903	5.44251e-57	9.08718e-54
ERCC-00130	2.0024	16.7395	666.495	2.55864e-53	3.20406e-50
ERCC-00004	1.99535	13.4868	784.419	2.94345e-57	5.89749e-54
ERCC-00095	1.98969	7.53048	519.5	1.69317e-47	1.88468e-44
ERCC-00116	1.97868	10.5481	844.562	4.48208e-59	1.49672e-55
ERCC-00033	1.9546	4.75132	107.012	1.02839e-18	3.96245e-16
GP1BA-201	1.92779	2.04847	17.2478	5.86624e-05	0.00195242
RBP1-207	-1.89688	2.0695	9.0857	0.00309222	0.0392622
HDAC10-201	1.89467	1.71215	9.55617	0.00243353	0.0335338
MAOA-201	-1.8641	2.37057	13.969	0.000276181	0.00683156
QPCT-201	-1.79196	1.82757	8.14121	0.00502848	0.0540508
SYNJ2BP-201	1.75091	1.69256	10.6215	0.00142313	0.022995
D2HGDH-201	-1.71378	2.54252	17.4815	5.26293e-05	0.00180562
ERCC-00154	1.70929	4.32204	66.3085	2.60127e-13	7.89683e-11
SLC7A8-201	-1.69768	3.17686	22.1757	6.23384e-06	0.000330426
CHMP4C-201	-1.6235	2.04049	8.228	0.00480724	0.0526903
P2RY1-201	1.59102	2.48533	15.3473	0.000143108	0.00409615
NEB-203	1.58902	3.28477	37.5756	9.57273e-09	1.21392e-06
NEMP2-202	-1.57749	2.2006	8.46551	0.00425172	0.048623
ZNF571-201	1.5447	1.89767	9.15117	0.00299054	0.0386715
MMP2-201	-1.51808	2.0708	8.35036	0.00451228	0.050734
SLFN5-201	-1.51029	2.3269	8.24426	0.00476691	0.0526197
TXNIP-204	1.50893	4.2169	44.7841	5.77564e-10	1.03322e-07
NFATC2-202	1.50236	1.49883	6.93654	0.00945853	0.0848304
DDIT4-201	-1.49264	4.43491	41.1433	2.34718e-09	3.85477e-07
ERCC-00147	1.48765	3.77901	33.8001	4.39323e-08	4.78385e-06
NEIL1-201	1.48603	1.81498	8.45191	0.00428166	0.0489096
ZNF782-205	1.47578	2.62039	17.8794	4.3772e-05	0.00160039
SMAD6-201	1.45173	3.76209	33.451	5.0678e-08	5.35881e-06
ZKSCAN4-201	1.44945	2.60144	15.8758	0.00011149	0.00334403
NRSN2-202	-1.44874	2.48259	9.67575	0.00229039	0.0320016
SHLD3-201	1.44804	2.0896	10.3525	0.00162841	0.0252921
SLC7A11-201	-1.43601	3.87566	21.449	8.625e-06	0.000421489
PLCD4-206	1.42286	1.94402	9.35061	0.00270148	0.0359886
LOX-201	-1.41138	3.02505	14.7468	0.000190352	0.0050603
JUNB-201	-1.40224	3.1166	21.335	9.07708e-06	0.000439296
ERCC-00137	-1.39696	2.14017	10.2788	0.00168976	0.0258838
ERCC-00013	-1.39328	2.67796	14.8108	0.000184636	0.00496892
POLN-210	1.39217	2.75653	15.2978	0.000146502	0.00416949
ID1-202	1.39133	2.93046	19.3169	2.26182e-05	0.000944123
DDIT3-206	-1.3791	3.60532	19.1216	2.47291e-05	0.00100706
HCN3-201	1.3653	2.35914	12.6118	0.000532733	0.0115518
ZNF26-201	1.3543	2.76387	15.3949	0.000139921	0.00401642
ZNF436-201	1.35418	3.01958	19.236	2.34687e-05	0.000963565
SYBU-235	1.34968	2.17237	10.156	0.00179732	0.0271988
CREB3L1-206	-1.34847	2.25272	6.54034	0.0116809	0.0973205
RPS27L-201	-1.34432	2.40528	10.2259	0.00173526	0.0264594
CCZ1-201	1.33783	2.55981	11.6827	0.000840256	0.0159124
CAPN5-201	-1.32384	2.30019	8.22191	0.00482243	0.0527638
WDR5B-201	1.31226	2.00192	8.35913	0.00449185	0.0505611
ZNF879-201	1.31212	1.98708	7.10654	0.0086442	0.0796666
DHRS3-204	-1.31036	1.96983	6.5919	0.0113633	0.0955815
MMD-201	-1.30858	2.15401	6.85633	0.00987002	0.0868874
EFCAB6-201	1.30414	1.88152	9.08006	0.00310114	0.0392759
ZNF35-202	1.30118	3.26434	21.4989	8.43434e-06	0.000414192
SLC41A2-201	-1.29552	2.0849	6.73883	0.0105066	0.089962
ZNF239-201	1.28725	2.57829	12.2335	0.000640961	0.0129198
CTSD-201	-1.28358	3.50956	20.6478	1.23655e-05	0.000568246
ZNF211-204	1.28288	2.57024	12.8271	0.000479695	0.0106318
KANSL1L-201	1.28123	3.00314	13.435	0.000357224	0.00848026
KCNK5-201	-1.27988	2.11281	8.0462	0.00528276	0.0557081
FBXO16-202	1.27896	1.95836	7.21224	0.00817486	0.076324
GREB1-204	-1.27835	3.73394	21.7813	7.43305e-06	0.00037992
TMCC2-201	1.27801	1.92701	7.24974	0.00801475	0.0751796
BCL6B-201	1.26503	2.76586	15.7297	0.00011944	0.00351773
NES-201	-1.26483	2.73954	10.5739	0.00145743	0.0232881
PROS1-202	-1.24947	2.59121	8.69991	0.00376822	0.0451016
ATOX1-207	-1.24742	2.12489	6.92577	0.00951273	0.085152
ERCC-00059	-1.23561	5.86709	105.076	1.76581e-18	6.55181e-16
SLC46A1-208	1.22924	2.13161	7.66088	0.00645824	0.0639948
RNF5-203	-1.22684	2.65134	8.92009	0.00336563	0.0418675
MRAS-201	-1.22329	2.39476	7.5618	0.00680218	0.0664822
ASNS-201	-1.21857	7.29185	135.891	5.28694e-22	2.30281e-19
ZNF586-203	1.19192	1.88177	6.9172	0.0095561	0.085152
MYB-205	1.19104	2.74841	12.6073	0.000533919	0.0115525
ALKBH4-201	1.19095	2.67832	11.599	0.00087569	0.01649
PDK1-201	-1.18541	3.77519	19.5346	2.04811e-05	0.000869407
HBP1-201	-1.1821	3.22199	13.0883	0.000422524	0.00955496
SLC41A1-201	1.17726	2.47654	9.9372	0.0020068	0.029435
IQSEC2-201	-1.16712	2.4931	7.83332	0.0059019	0.0604667
ZCCHC12-201	-1.16208	4.37321	38.3492	7.03831e-09	9.65888e-07
AKNA-202	-1.16012	3.2087	9.88017	0.00206542	0.0299607
SLC25A15-201	-1.15889	3.59857	17.9945	4.15049e-05	0.00153999
TENT5A-201	1.15342	2.48662	9.93929	0.00200469	0.029435
MYLIP-202	1.14439	2.2972	9.37259	0.00267143	0.0356832
FOXA1-201	1.14221	2.68508	11.1889	0.0010728	0.018789
ERCC-00003	-1.13983	12.9536	266.32	2.10859e-33	1.76032e-30
SLC30A1-201	1.13493	3.29403	17.4857	5.25268e-05	0.00180562
ERCC-00069	-1.12797	3.48399	19.9988	1.65852e-05	0.000725548
MYRF-201	-1.1275	3.04209	9.58451	0.0023988	0.0331464
ZFP36L2-201	1.1274	3.61216	22.1529	6.29737e-06	0.000332037
FAM227A-201	1.12416	2.17099	6.63417	0.0111097	0.0943191
GYPC-201	-1.12368	3.30625	12.4823	0.000567503	0.0119438
TSSC4-201	1.12089	2.44319	9.1282	0.00302582	0.0389623
ZNF140-202	1.11815	2.73055	9.74273	0.00221402	0.0313278
BHLHE40-201	-1.11724	4.34954	25.964	1.18261e-06	8.14267e-05
ERCC-00078	-1.11616	8.10025	224.917	2.97542e-30	1.98718e-27
ZNF319-201	1.11557	2.3992	8.09371	0.00515398	0.0547536
ABTB2-201	1.11329	3.23766	15.7555	0.000117995	0.00351059
DDR2-202	-1.10151	4.79725	26.6523	8.78912e-07	6.20066e-05
ERCC-00163	-1.09579	5.79677	85.0406	6.29575e-16	2.17486e-13
ERCC-00160	-1.09207	7.16235	166.42	4.13912e-25	1.8848e-22
PAN3-201	-1.09139	4.48909	17.9195	4.29678e-05	0.00157675
ATF5-201	1.09089	2.53846	9.29569	0.00277808	0.0367161
TMEM241-201	1.09041	2.51224	9.12185	0.00303564	0.0390386
TRIM52-205	1.08858	3.89025	22.4619	5.48838e-06	0.000297203
RPUSD4-201	1.08536	3.01418	12.253	0.000634872	0.0128488
C2orf69-201	1.08362	2.94665	11.649	0.000854334	0.0161485
BAMBI-201	1.08319	2.77258	10.447	0.00155302	0.0244625
PCK2-201	-1.08107	5.75403	43.6559	8.88847e-10	1.50923e-07
VASH1-201	-1.07937	3.28547	11.5115	0.000914373	0.016932
CCDC84-201	1.0717	2.90559	9.48548	0.00252244	0.0343808
ERCC-00046	-1.06965	13.7624	222.465	4.69305e-30	2.76559e-27
JDP2-203	-1.0694	3.05904	8.66315	0.00384014	0.0456352
ZNRD1-201	1.0683	2.35433	6.48615	0.0120246	0.098821
ERCC-00079	-1.06522	8.64552	224.353	3.30319e-30	2.06821e-27
IRX5-202	1.06202	3.14445	13.1888	0.000402427	0.00924919
IER5-201	1.05744	4.81963	39.3136	4.80713e-09	7.29664e-07
DBP-201	1.05058	2.35671	7.62325	0.00658669	0.0648187
ZBTB6-201	1.04797	2.73118	9.34694	0.00270653	0.0360079
ZNF431-201	1.04292	2.7383	8.39346	0.00441288	0.0498124
TRIM3-203	1.04158	2.45537	8.1344	0.00504626	0.0540678
KRCC1-201	-1.04061	2.95992	7.35951	0.00756451	0.0720355
ERCC-00022	-1.03951	9.99693	251.547	2.55999e-32	1.83186e-29
TWNK-201	1.03897	4.07462	24.6779	2.0679e-06	0.00013195
DAGLA-201	1.0389	2.84052	9.95108	0.0019928	0.0293156
LRRC37A3-211	1.03269	3.14874	11.9351	0.000742044	0.014351
NRXN3-218	1.03238	2.74755	7.81838	0.00594807	0.0607389
LCMT2-201	1.02939	3.18055	13.1833	0.000403493	0.00924919
DUSP7-202	1.02867	3.72747	19.3014	2.27793e-05	0.000946901
YPEL5-203	-1.0274	3.3932	10.3894	0.00159847	0.024982
ERCC-00085	1.02564	4.00398	20.8213	1.1435e-05	0.00053531
ERCC-00165	-1.02407	8.0253	193.788	1.24313e-27	6.55454e-25
NMU-201	-1.02074	3.13721	10.314	0.0016601	0.0257046
LRRC8D-201	-1.01907	4.88407	28.9582	3.28756e-07	2.75357e-05
PPIC-201	-1.01464	3.5789	12.6495	0.000523021	0.0114153
ZC3H6-202	-1.01189	4.19437	14.5807	0.000206044	0.00541744
ZBTB21-201	1.01106	5.342	27.4948	6.12435e-07	4.61306e-05
HTATIP2-204	-1.00972	3.3176	11.4868	0.000925595	0.0169828
FOXG1-201	1.00445	4.19647	22.856	4.60801e-06	0.000259343
RPUSD1-202	1.00032	3.5931	17.4629	5.30836e-05	0.00181499
KLC3-201	-0.998576	2.55377	6.47613	0.0120893	0.0991896
ERCC-00002	-0.994454	16.8036	171.223	1.43793e-25	6.85963e-23
ZNF174-201	0.993661	2.59814	7.60451	0.00665165	0.0652018
BORCS6-201	0.993303	2.72103	8.52008	0.00413373	0.0478748
NCKAP5L-201	0.992819	4.66913	33.2097	5.59495e-08	5.77837e-06
RWDD2B-207	-0.990124	2.7553	6.61161	0.0112443	0.0950596
FZD5-201	0.986905	2.72554	7.74981	0.00616486	0.0620142
SLC25A30-204	0.98657	2.86351	8.94603	0.00332122	0.041538
ZNF16-201	0.986449	2.73955	8.71428	0.00374049	0.0448233
ERCC-00043	-0.980602	12.0398	211.05	4.08689e-29	2.27458e-26
HPS6-201	0.977231	3.73213	17.8129	4.51388e-05	0.00163408
MVK-207	0.972857	2.56747	7.23849	0.00806243	0.0754854
SLC38A2-201	-0.972545	4.24488	18.0403	4.06352e-05	0.00151897
DISP1-201	0.971857	2.65578	6.46925	0.0121339	0.0994744
ENDOD1-201	-0.971108	2.8851	8.58213	0.00400366	0.0468574
MOXD1-202	-0.97059	4.58273	23.4002	3.62274e-06	0.000211003
IPPK-201	0.97037	2.6456	7.64708	0.00650504	0.064158
ZNF134-201	0.970202	2.91296	9.06623	0.00312314	0.0395045
TSC22D3-201	-0.959482	3.8672	11.5927	0.000878418	0.0165103
IGSF9B-206	0.952222	3.13098	10.565	0.00146395	0.0233532
BRPF1-206	0.947509	5.7665	61.4213	1.38081e-12	3.54692e-10
ZNF18-201	0.944442	3.0113	9.08581	0.00309204	0.0392622
PAG1-201	0.943742	3.02625	9.13378	0.00301721	0.0389014
HELZ2-204	-0.940991	3.8955	14.3373	0.000231474	0.00587064
STN1-201	-0.940902	3.22595	8.40565	0.00438516	0.0498079
ZNF514-201	0.940216	3.02532	9.02983	0.0031818	0.0400909
ERCC-00112	-0.939083	10.0916	191.739	1.88721e-27	9.45304e-25
ERCC-00014	-0.930652	6.06424	71.8003	4.19277e-14	1.35494e-11
DLX5-201	0.924743	3.20456	10.5185	0.00149838	0.0237513
TMEM14C-205	-0.923554	2.95398	7.64494	0.00651232	0.064158
POLH-202	0.918751	4.28053	22.7592	4.80992e-06	0.000269194
ALG2-203	0.911892	3.72074	15.0054	0.000168315	0.00460705
SESN2-201	-0.911811	5.56716	40.4405	3.08821e-09	4.98995e-07
DPH2-201	0.908986	3.43255	11.9697	0.000729556	0.0141916
EIF1AD-201	0.903243	3.26905	10.666	0.00139182	0.0226352
ZC3H12C-203	0.89867	2.95955	8.64823	0.00386973	0.0458211
ZNF256-201	0.898341	2.50869	6.67698	0.0108588	0.0926953
CCSER1-209	0.896011	2.62717	6.50299	0.0119167	0.0986202
ZNF276-201	0.894474	3.63179	13.7118	0.00031256	0.00760008
RHOBTB2-201	0.894451	2.61923	6.59607	0.011338	0.0955815
GPX3-201	-0.892846	3.00555	6.91842	0.00954992	0.085152
PANX1-201	0.892462	2.67617	7.09843	0.00868131	0.0798617
C15orf39-201	0.889845	5.2396	38.0497	7.92667e-09	1.0731e-06
ZNF620-201	0.886153	3.10413	8.87653	0.0034416	0.0423773
BRPF3-202	0.885207	5.45173	49.1588	1.11582e-10	2.23565e-08
MZT2A-201	-0.881466	3.11797	6.74536	0.0104702	0.0898033
PSME2-201	-0.880713	3.57741	11.1373	0.0011006	0.0190428
EEF1A2-201	-0.877683	6.32422	64.85	4.26144e-13	1.18586e-10
GPT2-201	-0.872659	5.11632	28.7043	3.66059e-07	2.93374e-05
SMYD4-201	0.87222	3.56083	11.8798	0.000762507	0.014665
KHDC4-203	0.871416	5.69724	53.204	2.53282e-11	5.51604e-09
OPTN-204	-0.868833	3.92453	11.8794	0.000762673	0.014665
PARP6-220	0.868725	3.76855	14.0059	0.00027133	0.00676166
SPTB-208	-0.86758	4.23906	16.8076	7.20173e-05	0.00230501
EHHADH-201	-0.867453	3.36982	8.52364	0.00412615	0.0478423
PXMP2-201	0.867119	2.98813	6.85146	0.00989559	0.0869597
TPP1-201	-0.867014	3.31921	8.58896	0.00398959	0.0468554
COMMD6-203	-0.866331	3.42957	9.32037	0.00274339	0.0363818
TMEM147-201	-0.864341	3.96768	14.2217	0.000244647	0.00615798
FAM13B-201	0.861538	4.29475	17.858	4.42064e-05	0.0016104
BEX2-202	-0.860854	4.30423	14.3063	0.000234925	0.00594314
SIM2-201	-0.858808	3.61977	9.76701	0.002187	0.0312451
FAR2-202	-0.854989	3.72103	10.7619	0.00132674	0.0218318
NR2F1-206	0.854856	4.17337	15.7402	0.000118851	0.00351773
ZNF791-201	0.850506	3.46582	9.69946	0.00226306	0.0317525
IRS1-201	0.844867	3.35	9.82519	0.00212359	0.0305663
SEMA3E-206	-0.8421	3.07147	6.49968	0.0119378	0.0986742
MARS2-201	0.840121	3.5881	12.0899	0.000687708	0.0136409
COMMD9-201	-0.836562	2.89881	6.90256	0.00963065	0.0854486
IFFO1-201	0.83271	3.66083	12.1552	0.000666031	0.013318
ENOSF1-201	-0.829656	3.36037	6.8451	0.00992911	0.0871015
ZNF180-201	0.82691	3.26346	8.055	0.00525866	0.0555124
FAM129A-201	-0.824708	4.24431	12.207	0.000649343	0.0130363
ZFP90-209	-0.82372	3.98778	12.3497	0.000605522	0.0124052
ZNF526-201	0.815947	3.88535	12.5578	0.000546972	0.0117335
TENT4B-202	0.815927	4.91345	26.7326	8.49068e-07	6.07569e-05
NOS1AP-206	0.813857	3.13651	6.86189	0.00984088	0.0868874
TRMU-201	0.813726	3.94973	15.0623	0.000163821	0.00454187
ARHGAP20-201	0.80856	3.21682	8.33342	0.00455196	0.0508945
ZNF280B-203	0.808455	3.17849	7.60746	0.00664137	0.0651648
MCUB-201	-0.807861	3.92507	10.878	0.00125212	0.0209062
ZBTB2-201	0.806977	4.27168	17.7704	4.60348e-05	0.00165296
ZNF266-207	0.806422	3.43791	9.61497	0.00236203	0.0327649
SLC25A32-201	0.803038	3.31874	9.08942	0.00308634	0.0392622
ARFRP1-214	0.802206	3.10976	7.44555	0.00723001	0.0697786
MAP3K15-201	-0.802043	3.33691	7.86396	0.00580836	0.0598644
HSPA13-201	-0.800306	4.58695	16.0367	0.000103356	0.00310937
MAPK7-202	0.800242	3.49013	9.41813	0.00261027	0.0351474
KCTD6-201	0.797802	3.46563	9.54365	0.00244904	0.0337012
SPPL3-201	0.795808	3.1529	7.77609	0.00608084	0.0615214
PCTP-201	0.795371	3.4629	8.86043	0.00347013	0.0425505
SELENOK-204	-0.7937	3.91194	11.2974	0.00101659	0.0180252
PTCH1-201	0.792143	4.81435	24.2743	2.46709e-06	0.000151627
COLEC12-201	-0.791413	4.56376	17.5255	5.15654e-05	0.00178132
NFKBIA-201	0.791297	3.29123	7.61029	0.00663154	0.0651612
ERCC-00039	-0.790589	3.84635	12.1745	0.000659751	0.0132188
TXLNA-201	0.789696	6.32045	62.0989	1.09266e-12	2.88059e-10
HECTD2-201	0.784825	3.30743	7.6447	0.00651314	0.064158
CGGBP1-202	-0.784789	4.03498	11.5036	0.000917971	0.0169672
NDUFB6-203	0.782676	3.09098	7.26132	0.00796596	0.0748941
ZBTB4-201	0.782206	3.11328	7.5465	0.00685694	0.0668868
PPRC1-201	0.781625	6.44273	63.9253	5.83905e-13	1.58096e-10
FLT1-201	-0.781274	3.94351	11.0812	0.00113174	0.0194863
SPINDOC-201	0.779942	4.25289	15.1653	0.000156001	0.00438994
ZNF202-201	0.779778	3.8449	12.0735	0.000693273	0.0136448
ITPKC-201	0.77935	3.08724	6.50224	0.0119214	0.0986202
FAM76B-201	0.777755	3.33711	7.75418	0.00615082	0.0620142
TXNDC17-201	-0.77597	3.26021	6.73611	0.0105219	0.0900157
ALDH1L2-201	-0.775242	5.82631	29.6237	2.48284e-07	2.20116e-05
PGS1-201	0.773336	3.08541	7.1441	0.00847428	0.0786796
ZNF45-201	0.771908	3.29406	7.22048	0.00813938	0.0761348
RPUSD2-201	0.77163	3.47462	9.20044	0.00291628	0.0380904
SETBP1-201	0.771574	3.18665	6.90909	0.0095973	0.0853112
GCAT-201	-0.770646	3.55547	9.13379	0.00301719	0.0389014
PPP1R18-201	0.765931	3.18969	7.04338	0.00893792	0.0815484
ROMO1-204	-0.763001	3.66493	8.21755	0.00483333	0.0527638
CCDC97-201	0.762232	4.525	17.8053	4.52962e-05	0.00163408
ZNF503-201	0.761534	5.59933	32.0122	9.16451e-08	9.00099e-06
KCNQ5-205	0.759514	3.12623	6.85988	0.00985142	0.0868874
CTH-202	-0.758285	3.99349	8.15005	0.00500548	0.0539052
FOXO1-201	0.756614	3.44226	8.34173	0.00453245	0.0508467
STC2-201	-0.756141	4.94166	19.6047	1.98378e-05	0.000852939
FEM1C-201	0.755717	3.69852	9.4117	0.00261881	0.0351679
ZNF142-201	0.753041	5.64268	37.8025	8.74549e-09	1.15279e-06
KCNC4-204	0.752723	4.17842	12.8738	0.000468917	0.0104624
URB2-201	0.75193	5.64513	41.5301	2.01929e-09	3.37155e-07
STK35-201	0.750933	3.62845	9.41888	0.00260928	0.0351474
BRMS1-201	0.75087	3.73621	10.8309	0.00128186	0.0212964
ROR2-201	0.747858	3.1442	6.69117	0.0107769	0.0921187
PERP-201	-0.747559	3.53722	7.90795	0.00567672	0.058871
E2F1-201	0.746665	4.07897	10.7135	0.0013592	0.0221766
SHQ1-201	-0.744001	3.59488	8.26905	0.00470612	0.0520949
IFRD1-202	-0.742624	4.91075	18.3418	3.53627e-05	0.00137311
MSANTD4-201	0.742387	4.06104	11.515	0.000912793	0.016932
LYSMD3-201	0.738684	3.5693	7.81653	0.00595384	0.0607389
CARS-203	-0.738234	6.44404	45.5368	4.33906e-10	7.9034e-08
KLHL21-201	0.735351	3.27355	6.61363	0.0112322	0.0950371
TNFRSF1A-201	0.731463	4.00767	11.996	0.000720173	0.0140637
ZNF354B-201	0.731023	3.50534	8.09129	0.00516045	0.0547642
PDE4A-203	0.730539	3.05645	6.59283	0.0113577	0.0955815
COL4A3BP-201	-0.729975	4.16297	10.9239	0.00122383	0.0206403
CYTH3-201	-0.729699	3.72295	7.89859	0.00570448	0.0590183
MAT2A-201	0.728673	6.10205	43.7659	8.52153e-10	1.47187e-07
ERCC-00143	-0.728217	3.71976	9.1676	0.00296556	0.0385331
CKS2-201	-0.727762	4.12383	9.99753	0.00194666	0.0288888
DGKE-201	0.727048	3.40346	7.32141	0.00771777	0.0729402
IREB2-201	0.724784	6.13359	46.9931	2.50445e-10	4.73388e-08
DOP1B-202	-0.723096	4.14775	11.3503	0.000990291	0.0177168
GSTM3-201	-0.721302	4.18838	10.2647	0.00170174	0.0260275
ZNF263-201	0.721205	4.64313	17.3021	5.72015e-05	0.00192297
ZIC2-201	0.720638	5.55929	34.267	3.63114e-08	3.99744e-06
GTF2E1-201	-0.718771	3.74085	8.15938	0.00498131	0.0537745
ALDH2-201	-0.718345	4.32807	10.0992	0.00184941	0.0276723
NACC2-201	0.717774	3.25392	7.11071	0.00862514	0.0795641
ZNF787-203	0.716004	3.31943	6.63923	0.0110797	0.0941446
ISG20L2-201	0.715613	5.58736	34.9027	2.80405e-08	3.22885e-06
DCLRE1C-209	0.715381	3.75136	8.81409	0.0035536	0.0432564
ZNF398-202	0.715341	4.90477	20.4035	1.38075e-05	0.000628741
NEURL4-202	0.710724	4.43283	13.9709	0.000275933	0.00683156
CENPB-201	0.710466	5.27828	26.7124	8.56488e-07	6.08532e-05
DPH7-201	0.707853	3.49984	7.36748	0.00753287	0.0718023
ZNF12-204	0.701038	3.69424	8.99727	0.00323524	0.0406148
HPF1-201	-0.700965	3.75545	7.70881	0.00629837	0.0629084
ZNF426-201	0.700584	3.35024	6.79616	0.0101908	0.0883913
ZNF322-208	0.700506	3.81709	8.98093	0.00326241	0.0408561
MICAL3-206	0.69728	5.77812	35.0003	2.69531e-08	3.13973e-06
SETDB1-205	0.696282	5.74047	34.8001	2.92331e-08	3.32792e-06
GINS3-201	0.692106	3.9057	10.1038	0.0018452	0.0276723
MAP1A-201	0.691953	5.53447	29.5042	2.61096e-07	2.29444e-05
WDR91-201	0.689825	3.75439	8.0724	0.00521133	0.0551872
ARHGEF40-201	-0.688881	4.01071	8.33478	0.00454877	0.0508945
NR3C2-203	0.686704	3.77427	8.47237	0.00423671	0.0485963
EIF4EBP1-201	-0.685983	6.33229	35.5122	2.1909e-08	2.58217e-06
TMEM115-201	0.685962	3.71334	9.11372	0.00304827	0.039142
ERCC-00162	-0.685727	6.58429	48.3118	1.52885e-10	3.00314e-08
FIG4-201	-0.685536	4.13035	8.52378	0.00412586	0.0478423
UBE2A-202	-0.682584	3.94454	8.78922	0.00359926	0.0436002
HSPA1B-201	0.682501	5.66445	32.3885	7.84449e-08	7.99343e-06
SETD1B-204	0.68106	5.97414	37.3126	1.06313e-08	1.3313e-06
CASP2-201	0.679742	5.01954	19.067	2.53538e-05	0.00102006
TOGARAM1-201	0.678594	4.43176	12.6942	0.000511758	0.011243
SLC1A3-201	0.67817	4.27232	12.0741	0.000693065	0.0136448
IDH2-201	-0.677884	5.50157	20.7735	1.16838e-05	0.000544409
ERCC-00099	-0.677436	7.05687	64.8967	4.1944e-13	1.18586e-10
ZNF579-201	0.676655	3.5792	6.66534	0.0109264	0.0930788
TENT4A-207	0.675993	4.58049	13.5803	0.000333028	0.00796247
ZCCHC2-201	0.674637	4.89974	18.5241	3.25194e-05	0.00127757
CHERP-203	0.674613	6.09944	39.1917	5.04376e-09	7.50783e-07
VEGFA-222	-0.67342	4.58456	11.1763	0.0010795	0.0188405
TBX2-201	0.673199	3.77934	9.53513	0.00245966	0.0337597
HOXA3-207	0.67242	3.73532	7.80457	0.00599111	0.0609329
LGMN-202	-0.670308	5.18766	18.1804	3.80923e-05	0.0014621
PIH1D1-201	-0.670135	4.12658	9.41286	0.00261727	0.0351679
ERCC-00054	-0.66797	5.29602	21.8184	7.31083e-06	0.000375589
PCDH7-201	0.666952	5.3813	25.3884	1.5176e-06	0.000101356
NFU1-203	-0.665964	4.17362	8.88845	0.00342064	0.042359
AK4-202	-0.665713	3.952	8.39236	0.00441539	0.0498124
GNL1-201	-0.66322	4.58159	12.6586	0.000520714	0.0114147
DPP3-215	-0.662112	3.94435	8.39398	0.00441168	0.0498124
TNRC6C-202	0.661428	4.42513	12.3024	0.000619693	0.0125925
CEBPB-201	-0.658714	4.50183	10.1273	0.00182349	0.0274469
RUBCN-202	0.656782	4.04442	9.74646	0.00220986	0.0313248
FDX1-201	-0.655771	3.75225	7.39347	0.00743061	0.0709627
ETFB-201	-0.654031	4.59296	11.0806	0.00113207	0.0194863
IER2-203	-0.653683	4.0466	8.98081	0.00326261	0.0408561
ZNF384-204	0.653309	5.2629	22.7206	4.89297e-06	0.000272321
WDCP-201	0.65256	3.46654	6.61569	0.0112198	0.0950128
RUNDC1-201	0.651893	3.75386	7.93677	0.00559218	0.0581217
SNAPC4-201	0.651335	4.9442	17.7495	4.64823e-05	0.00165715
ZNF445-201	0.648872	4.98044	17.6282	4.91685e-05	0.00172227
MTERF4-222	0.648246	4.06641	10.191	0.00176594	0.0267642
CREBZF-204	0.648071	5.35155	23.1809	3.99105e-06	0.000229784
TRIM9-201	-0.647859	3.59963	6.46013	0.0121934	0.0996471
TECPR2-201	0.646461	3.97233	8.48568	0.00420772	0.0484035
ASS1-204	-0.643022	4.47137	8.609	0.00394863	0.0464288
YKT6-201	0.642034	4.26346	10.4243	0.00157074	0.0246641
FAM216A-201	-0.640155	5.26697	19.5104	2.07083e-05	0.00087534
MYH14-203	-0.638445	4.86284	14.5273	0.000211365	0.00550619
TADA2B-201	0.638222	4.72045	14.0591	0.00026448	0.00662391
RFX7-201	0.636967	5.39013	20.9639	1.07239e-05	0.000504374
ZIC5-201	0.636862	4.79348	16.2252	9.45966e-05	0.0029249
PURB-201	0.635422	3.60044	6.77785	0.0102906	0.0888721
CPNE1-202	-0.635282	4.65242	12.6403	0.000525391	0.0114421
MTF1-201	0.634359	3.674	6.94856	0.00939841	0.0843667
TGFBR3-201	0.634148	4.26204	9.91389	0.00203056	0.0296533
WDTC1-202	-0.633176	4.34765	9.71315	0.00224743	0.0316138
ZNF800-203	0.633086	3.97869	7.93653	0.00559287	0.0581217
UBXN6-201	0.632412	4.59787	11.9202	0.000747524	0.0144291
ADGRV1-201	0.632043	4.77808	14.3911	0.00022559	0.00575052
TMEM201-201	0.630337	3.81861	7.91885	0.0056446	0.0585985
ZNF865-201	0.627096	3.81527	7.53518	0.00689777	0.0671544
PPP1R12B-216	0.626355	3.69588	6.85323	0.00988631	0.0869544
RAB12-201	0.624265	3.93538	7.98236	0.00546106	0.0570851
OGFR-201	0.62346	4.43962	11.028	0.00116206	0.0199001
XYLB-201	0.621695	4.03348	8.17381	0.00494416	0.0536045
HNRNPLL-209	0.620517	4.29906	9.71087	0.00225002	0.0316138
SLC2A1-203	-0.620287	3.82598	6.92009	0.00954144	0.085152
MIF-201	-0.620079	6.02535	28.4828	4.02097e-07	3.17182e-05
TIPARP-202	0.62003	4.34697	9.33055	0.00272921	0.0362616
NDUFA13-204	-0.619385	4.00802	7.03494	0.00897793	0.0818388
NCAPH2-205	-0.61487	5.21852	18.0694	4.00935e-05	0.00150999
SMAD2-201	0.6142	3.96134	7.65566	0.00647591	0.0640431
RSRP1-201	0.613713	5.19431	18.3668	3.49581e-05	0.00136625
ZNF205-206	0.613375	3.96451	7.68693	0.00637084	0.0634424
STYX-201	0.613275	3.67541	6.54772	0.0116349	0.0971264
MARS-201	-0.612476	7.27875	49.9105	8.44811e-11	1.72721e-08
RDH14-201	0.612324	4.15434	8.33778	0.00454172	0.0508936
MAP7-201	-0.611887	5.28329	18.3612	3.50496e-05	0.00136625
WDR34-201	-0.611871	4.96228	14.4775	0.000216462	0.00561792
NDUFA3-214	-0.611659	3.88502	6.90105	0.00963834	0.0854486
SARS-201	-0.611569	7.47749	51.8876	4.08789e-11	8.7133e-09
ZNF649-201	0.61012	3.83266	7.01285	0.00908358	0.0825765
PCGF2-204	0.610023	4.46241	10.7553	0.0013311	0.0218606
MBD4-201	0.609393	4.66265	12.5007	0.000562413	0.0118866
PAIP2-202	-0.608928	5.11586	14.746	0.00019043	0.0050603
SHMT2-201	-0.608787	6.86518	38.0008	8.08216e-09	1.07956e-06
DSE-213	-0.608693	4.70716	11.8644	0.000768323	0.0147453
FIBP-202	-0.607259	4.19381	7.34952	0.00760438	0.0723463
CPE-201	-0.607197	5.73349	22.263	5.99625e-06	0.000319583
HIC2-203	0.606765	3.94615	7.24253	0.00804526	0.0753951
SRF-201	0.606721	4.99486	16.5894	7.97509e-05	0.00250453
NPTX1-201	0.606698	4.13193	9.08801	0.00308857	0.0392622
PPARGC1B-201	0.606551	4.97244	15.8065	0.000115193	0.00344478
BUD13-201	0.606113	4.96048	15.2317	0.000151164	0.00426579
ZNF746-205	0.605587	4.09892	8.21269	0.00484553	0.052821
PSMC3IP-202	0.603789	5.06983	17.5427	5.1156e-05	0.00177329
PHF23-201	0.603391	4.75129	13.2445	0.000391711	0.00906273
NR3C1-202	0.603361	4.74433	12.5657	0.000544847	0.011713
COX7B-203	-0.602982	4.58966	10.2964	0.0016749	0.0258514
POLR2I-201	-0.602834	4.71013	9.83016	0.00211827	0.0305335
NKAPD1-202	0.601077	5.38929	20.2131	1.505e-05	0.000673083
ANKRD36-201	0.600915	4.13797	7.84472	0.00586691	0.0604057
PELO-201	0.600819	4.03392	7.74455	0.00618183	0.0620905
CLGN-201	-0.600588	4.58455	8.91603	0.00337264	0.0418675
SDCBP-201	-0.599798	5.00872	13.1863	0.000402922	0.00924919
ANK2-202	-0.599592	5.44985	15.3001	0.000146343	0.00416949
ATG16L1-203	0.599295	4.17817	8.65639	0.00385351	0.0457399
PIAS4-201	0.599117	3.88307	7.19729	0.0082396	0.0767854
TOB2-201	0.598652	5.25503	18.728	2.96129e-05	0.00118192
BSN-201	0.597331	4.84096	13.6187	0.000326912	0.00787615
ERCC-00157	-0.597262	6.18769	32.0658	8.96343e-08	8.89065e-06
CIC-204	0.596457	5.9001	28.1429	4.64565e-07	3.60776e-05
ALDOA-202	-0.595925	4.44831	9.61279	0.00236465	0.0327649
PABPC4L-201	0.595489	4.23385	8.06951	0.00521917	0.0552119
RSL24D1-201	-0.595318	5.75419	19.2616	2.31959e-05	0.000956283
SERF2-203	-0.59335	4.91187	10.9561	0.00120434	0.0204492
LANCL1-205	-0.593104	4.64151	9.87691	0.00206883	0.0299607

## Sheet: Supplementary file_5
# species: Homo sapiens
# support: EXP, IMP, ISS, ISM, TAS, IEA, HMP, HEP, IDA, IGI, ISO, IGC, NAS, HGI, IPI, IEP, ISA, RCA, IC, HDA
# associations retrieved on: 2021-06-07 10:57:17-04
# gofunc built on: 2018-02-21 10:04:34.764444-05
# gene associations file: ftp://ftp.geneontology.org/pub/go/gene-associations/goa_human.gaf.gz
# revision: 2018-02-02 $
# downloaded on: 2018-02-14 09:47:26-05
# GO DAG files from: http://archive.geneontology.org/latest-full/go_201512-termdb-tables.tar.gz
# downloaded on: 2015-12-22 05:43:21-05
# translation required: yes
# translation info:
# authority: ensembl
# synergizer db built on: 2015-11-17 14:24:21.26681-05
# synergizer db built from: Ensembl Genes 82 / Metazoa Mart / Plant Mart
# namespace: hgnc_symbol
# coverage: 99.8%
# size of "genespace": 9939
# number of attributes: 17128
# NOTE: these associations have been restricted to the genes included
# in the user-supplied gene space.
# NOTE: the last record consists of all the entities in the
# "genespace" that are not associated with any attribute (for
# the requested support).
# Original number of entities in query: 407
# Number of entities in query: 407
# Total number of entities: 9939
# Total number of attributes: 17128
# Original total number of attributes: 20270
# Translation required: yes
# Translation coverage: 0.997782
# Mode: unordered
# Number of simulations: 1000
# Adjusted P-value cutoff: 0.05
# Over/under: over
# Evidence codes: EXP, IMP, ISS, ISM, TAS, IEA, HMP, HEP, IDA, IGI, ISO, IGC, NAS, HGI, IPI, IEP, ISA, RCA, IC, HDA
OVERREPRESENTED ATTRIBUTES FOR GENES. WITH HIGH RNA EXPRESSION
N	X	LOD	P	P_adj	attrib ID	attrib name
5	7	1.71677	2.20489e-06	0.003	GO:0042800	histone methyltransferase activity (H3-K4 specific)
7	14	1.37629	4.90672e-07	<0.001	GO:0000380	alternative mRNA splicing, via spliceosome
9	29	1.04384	1.43042e-06	0.001	GO:0051568	histone H3-K4 methylation
9	32	0.984385	3.59187e-06	0.006	GO:0018024	histone-lysine N-methyltransferase activity
9	37	0.90038	1.32764e-05	0.028	GO:0016278	lysine N-methyltransferase activity
9	37	0.90038	1.32764e-05	0.028	GO:0016279	protein-lysine N-methyltransferase activity
10	42	0.887715	5.38491e-06	0.009	GO:0042054	histone methyltransferase activity
13	57	0.863124	3.56106e-07	<0.001	GO:0034968	histone lysine methylation
13	61	0.825559	8.22512e-07	<0.001	GO:0018022	peptidyl-lysine methylation
13	70	0.751221	4.2511e-06	0.007	GO:0016571	histone methylation
15	103	0.624728	1.77275e-05	0.041	GO:0006479	protein methylation
15	103	0.624728	1.77275e-05	0.041	GO:0008213	protein alkylation
28	233	0.532587	2.82251e-07	<0.001	GO:0018205	peptidyl-lysine modification
203	2629	0.464547	5.95799e-25	<0.001	GO:0003676	nucleic acid binding
29	277	0.464188	3.06588e-06	0.006	GO:0016570	histone modification
36	351	0.457948	3.14815e-07	<0.001	GO:0006397	mRNA processing
187	2370	0.456697	1.81431e-23	<0.001	GO:0016070	RNA metabolic process
38	375	0.453148	1.9865e-07	<0.001	GO:0016569	covalent chromatin modification
33	329	0.445076	1.64645e-06	0.001	GO:0003682	chromatin binding
204	2735	0.443942	4.51695e-23	<0.001	GO:0090304	nucleic acid metabolic process
135	1588	0.441542	1.6115e-18	<0.001	GO:0006351	transcription, DNA-templated
135	1588	0.441542	1.6115e-18	<0.001	GO:0097659	nucleic acid-templated transcription
30	307	0.43052	8.37464e-06	0.016	GO:0008380	RNA splicing
53	561	0.42787	7.37987e-09	<0.001	GO:0043565	sequence-specific DNA binding
148	1851	0.419981	4.92344e-18	<0.001	GO:0032774	RNA biosynthetic process
122	1476	0.413425	1.45087e-15	<0.001	GO:0003677	DNA binding
53	597	0.396427	6.08307e-08	<0.001	GO:0001071	nucleic acid binding transcription factor activity
53	597	0.396427	6.08307e-08	<0.001	GO:0003700	transcription factor activity, sequence-specific DNA binding
39	433	0.394988	2.74348e-06	0.003	GO:0016568	chromatin modification
206	2994	0.394224	8.8096e-19	<0.001	GO:0006139	nucleobase-containing compound metabolic process
153	2034	0.389663	3.22595e-16	<0.001	GO:0034654	nucleobase-containing compound biosynthetic process
47	533	0.389186	4.48129e-07	<0.001	GO:0000122	negative regulation of transcription from RNA polymerase II promoter
207	3067	0.38275	7.37278e-18	<0.001	GO:0006725	cellular aromatic compound metabolic process
153	2065	0.380803	1.31341e-15	<0.001	GO:0019438	aromatic compound biosynthetic process
148	1983	0.380184	2.77439e-15	<0.001	GO:0034645	cellular macromolecule biosynthetic process
207	3079	0.380151	1.19878e-17	<0.001	GO:0046483	heterocycle metabolic process
153	2074	0.37825	1.95915e-15	<0.001	GO:0018130	heterocycle biosynthetic process
44	513	0.373516	2.26968e-06	0.003	GO:0016071	mRNA metabolic process
159	2207	0.370161	3.42086e-15	<0.001	GO:0009059	macromolecule biosynthetic process
42	492	0.370012	4.41874e-06	0.008	GO:0006325	chromatin organization
36	420	0.368788	2.0217e-05	0.046	GO:1990837	sequence-specific double-stranded DNA binding
208	3174	0.364253	2.11216e-16	<0.001	GO:1901360	organic cyclic compound metabolic process
153	2131	0.36229	2.28004e-14	<0.001	GO:1901362	organic cyclic compound biosynthetic process
100	1290	0.359888	6.45806e-11	<0.001	GO:0003723	RNA binding
67	840	0.351206	6.2502e-08	<0.001	GO:0051253	negative regulation of RNA metabolic process
40	488	0.348736	1.9767e-05	0.044	GO:0001067	regulatory region nucleic acid binding
54	671	0.347516	1.08584e-06	0.001	GO:0006396	RNA processing
153	2185	0.34748	2.06633e-13	<0.001	GO:0044271	cellular nitrogen compound biosynthetic process
208	3263	0.345488	5.74708e-15	<0.001	GO:0034641	cellular nitrogen compound metabolic process
76	977	0.344298	1.98749e-08	<0.001	GO:0010629	negative regulation of gene expression
157	2271	0.343581	2.444e-13	<0.001	GO:0051252	regulation of RNA metabolic process
230	3779	0.340261	9.39434e-15	<0.001	GO:0097159	organic cyclic compound binding
229	3756	0.340227	9.4822e-15	<0.001	GO:1901363	heterocyclic compound binding
62	803	0.331384	6.61231e-07	<0.001	GO:1902679	negative regulation of RNA biosynthetic process
176	2677	0.331041	3.3135e-13	<0.001	GO:0051171	regulation of nitrogen compound metabolic process
162	2420	0.328785	1.35789e-12	<0.001	GO:2000112	regulation of cellular macromolecule biosynthetic process
165	2479	0.328076	1.1779e-12	<0.001	GO:0010556	regulation of macromolecule biosynthetic process
61	797	0.326309	1.11009e-06	0.001	GO:1903507	negative regulation of nucleic acid-templated transcription
59	771	0.325023	1.71937e-06	0.001	GO:0045892	negative regulation of transcription, DNA-templated
165	2503	0.322149	2.79326e-12	<0.001	GO:0019219	regulation of nucleobase-containing compound metabolic process
76	1020	0.321893	1.23006e-07	<0.001	GO:0051172	negative regulation of nitrogen compound metabolic process
146	2157	0.32115	1.65914e-11	<0.001	GO:1903506	regulation of nucleic acid-templated transcription
146	2171	0.317329	2.75631e-11	<0.001	GO:2001141	regulation of RNA biosynthetic process
144	2138	0.316538	3.69139e-11	<0.001	GO:0006355	regulation of transcription, DNA-templated
69	929	0.31582	5.96718e-07	<0.001	GO:0045934	negative regulation of nucleobase-containing compound metabolic process
210	3463	0.313259	1.11265e-12	<0.001	GO:0006807	nitrogen compound metabolic process
167	2586	0.311257	1.14746e-11	<0.001	GO:0010468	regulation of gene expression
164	2543	0.3077	2.33119e-11	<0.001	GO:0031326	regulation of cellular biosynthetic process
69	945	0.307017	1.1191e-06	0.001	GO:0010558	negative regulation of macromolecule biosynthetic process
166	2586	0.306614	2.36008e-11	<0.001	GO:0009889	regulation of biosynthetic process
247	4374	0.305249	3.82957e-12	<0.001	GO:0044260	cellular macromolecule metabolic process
66	904	0.305172	2.00807e-06	0.001	GO:2000113	negative regulation of cellular macromolecule biosynthetic process
61	839	0.300145	5.96883e-06	0.009	GO:0044451	nucleoplasm part
255	4634	0.294799	2.40092e-11	<0.001	GO:0043170	macromolecule metabolic process
69	969	0.294079	2.75829e-06	0.003	GO:0031327	negative regulation of cellular biosynthetic process
69	982	0.2872	4.40782e-06	0.008	GO:0009890	negative regulation of biosynthetic process
192	3251	0.276472	4.28935e-10	<0.001	GO:0044428	nuclear part
154	2495	0.272276	4.50043e-09	<0.001	GO:0005654	nucleoplasm
165	2719	0.270542	2.96775e-09	<0.001	GO:0044249	cellular biosynthetic process
79	1189	0.263754	6.70327e-06	0.012	GO:0006357	regulation of transcription from RNA polymerase II promoter
183	3153	0.256659	7.86084e-09	<0.001	GO:0005634	nucleus
167	2828	0.254825	1.84862e-08	<0.001	GO:0009058	biosynthetic process
165	2791	0.253967	2.24222e-08	<0.001	GO:1901576	organic substance biosynthetic process
192	3468	0.231905	1.26298e-07	<0.001	GO:0080090	regulation of primary metabolic process
194	3530	0.228377	1.83428e-07	<0.001	GO:0031323	regulation of cellular metabolic process
191	3469	0.227228	2.22391e-07	<0.001	GO:0060255	regulation of macromolecule metabolic process
262	5286	0.209206	2.04635e-06	0.001	GO:0044238	primary metabolic process
131	2322	0.202274	2.08292e-05	0.046	GO:0046872	metal ion binding
132	2349	0.200475	2.32684e-05	0.05	GO:0043169	cation binding
205	3954	0.194604	6.4804e-06	0.012	GO:0019222	regulation of metabolic process
# species: Homo sapiens
# support: EXP, IMP, ISS, ISM, TAS, IEA, HMP, HEP, IDA, IGI, ISO, IGC, NAS, HGI, IPI, IEP, ISA, RCA, IC, HDA
# associations retrieved on: 2021-06-07 10:58:25-04
# gofunc built on: 2018-02-21 10:04:34.764444-05
# gene associations file: ftp://ftp.geneontology.org/pub/go/gene-associations/goa_human.gaf.gz
# revision: 2018-02-02 $
# downloaded on: 2018-02-14 09:47:26-05
# GO DAG files from: http://archive.geneontology.org/latest-full/go_201512-termdb-tables.tar.gz
# downloaded on: 2015-12-22 05:43:21-05
# translation required: yes
# translation info:
# authority: ensembl
# synergizer db built on: 2015-11-17 14:24:21.26681-05
# synergizer db built from: Ensembl Genes 82 / Metazoa Mart / Plant Mart
# namespace: hgnc_symbol
# coverage: 99.8%
# size of "genespace": 9939
# number of attributes: 17128
# NOTE: these associations have been restricted to the genes included
# in the user-supplied gene space.
# NOTE: the last record consists of all the entities in the
# "genespace" that are not associated with any attribute (for
# the requested support).
# Original number of entities in query: 432
# Number of entities in query: 432
# Total number of entities: 9939
# Total number of attributes: 17128
# Original total number of attributes: 20270
# Translation required: yes
# Translation coverage: 0.997782
# Mode: unordered
# Number of simulations: 1000
# Adjusted P-value cutoff: 0.05
# Over/under: over
# Evidence codes: EXP, IMP, ISS, ISM, TAS, IEA, HMP, HEP, IDA, IGI, ISO, IGC, NAS, HGI, IPI, IEP, ISA, RCA, IC, HDA
OVERREPRESENTED ATTRIBUTES FOR GENES. WITH LOW RNA EXPRESSION
N	X	LOD	P	P_adj	attrib ID	attrib name
24	30	1.94285	5.16853e-28	<0.001	GO:0022627	cytosolic small ribosomal subunit
55	84	1.67429	3.90395e-55	<0.001	GO:0006614	SRP-dependent cotranslational protein targeting to membrane
55	87	1.63209	7.43753e-54	<0.001	GO:0045047	protein targeting to ER
55	88	1.61889	1.90883e-53	<0.001	GO:0006613	cotranslational protein targeting to membrane
30	47	1.61378	7.20674e-30	<0.001	GO:0022625	cytosolic large ribosomal subunit
13	20	1.61029	9.7265e-14	<0.001	GO:0002181	cytoplasmic translation
56	91	1.60252	7.39897e-54	<0.001	GO:0072599	establishment of protein localization to endoplasmic reticulum
57	93	1.59918	1.13327e-54	<0.001	GO:0070972	protein localization to endoplasmic reticulum
56	106	1.44877	1.201e-48	<0.001	GO:0006612	protein targeting to membrane
54	108	1.39753	3.28246e-45	<0.001	GO:0019083	viral transcription
54	110	1.38178	1.18322e-44	<0.001	GO:0000184	nuclear-transcribed mRNA catabolic process, nonsense-mediated decay
62	129	1.37278	1.54823e-50	<0.001	GO:0006413	translational initiation
13	26	1.35474	1.02686e-11	<0.001	GO:0042788	polysomal ribosome
6	12	1.34787	4.81509e-06	0.012	GO:0042274	ribosomal small subunit biogenesis
58	125	1.3394	3.7908e-46	<0.001	GO:0044445	cytosolic part
25	56	1.27475	7.29183e-20	<0.001	GO:0015935	small ribosomal subunit
8	18	1.25796	3.55926e-07	<0.001	GO:0006735	NADH regeneration
8	18	1.25796	3.55926e-07	<0.001	GO:0061621	canonical glycolysis
8	18	1.25796	3.55926e-07	<0.001	GO:0061718	glucose catabolic process to pyruvate
8	19	1.21841	5.91534e-07	<0.001	GO:0061615	glycolytic process through fructose-6-phosphate
8	19	1.21841	5.91534e-07	<0.001	GO:0061620	glycolytic process through glucose-6-phosphate
10	24	1.21142	2.46097e-08	<0.001	GO:0006734	NADH metabolic process
41	103	1.20466	1.8211e-29	<0.001	GO:0003735	structural constituent of ribosome
59	158	1.17792	2.77936e-40	<0.001	GO:0090150	establishment of protein localization to membrane
57	153	1.17419	7.43841e-39	<0.001	GO:0006412	translation
55	149	1.1657	3.00918e-37	<0.001	GO:0044391	ribosomal subunit
8	21	1.14868	1.47448e-06	0.002	GO:0006007	glucose catabolic process
59	166	1.14397	7.57003e-39	<0.001	GO:0043043	peptide biosynthetic process
8	22	1.1176	2.22949e-06	0.002	GO:0048027	mRNA 5'-UTR binding
9	25	1.11072	5.59255e-07	<0.001	GO:0006096	glycolytic process
10	28	1.10543	1.40727e-07	<0.001	GO:0006094	gluconeogenesis
57	172	1.09526	1.29433e-35	<0.001	GO:0000956	nuclear-transcribed mRNA catabolic process
8	23	1.08859	3.28944e-06	0.009	GO:0070059	intrinsic apoptotic signaling pathway in response to endoplasmic reticulum stress
9	26	1.08512	8.22675e-07	0.001	GO:0006757	ATP generation from ADP
62	195	1.07356	1.62091e-37	<0.001	GO:0043604	amide biosynthetic process
62	196	1.07027	2.28243e-37	<0.001	GO:0006605	protein targeting
12	36	1.06095	1.89086e-08	<0.001	GO:0004812	aminoacyl-tRNA ligase activity
12	36	1.06095	1.89086e-08	<0.001	GO:0016875	ligase activity, forming carbon-oxygen bonds
12	36	1.06095	1.89086e-08	<0.001	GO:0016876	ligase activity, forming aminoacyl-tRNA and related compounds
57	184	1.05177	8.27377e-34	<0.001	GO:0006402	mRNA catabolic process
63	206	1.04979	5.56362e-37	<0.001	GO:0006518	peptide metabolic process
28	87	1.04877	1.45727e-17	<0.001	GO:0005840	ribosome
30	94	1.04511	1.28764e-18	<0.001	GO:0015934	large ribosomal subunit
10	31	1.04003	4.22777e-07	<0.001	GO:0019319	hexose biosynthetic process
11	35	1.0237	1.49384e-07	<0.001	GO:0019674	NAD metabolic process
9	29	1.01627	2.34636e-06	0.002	GO:0046031	ADP metabolic process
12	39	1.01064	5.24494e-08	<0.001	GO:0006090	pyruvate metabolic process
58	202	1.00527	2.22324e-32	<0.001	GO:0006401	RNA catabolic process
55	191	1.00405	8.59167e-31	<0.001	GO:0006364	rRNA processing
10	33	1.00131	8.16121e-07	0.001	GO:0006165	nucleoside diphosphate phosphorylation
10	33	1.00131	8.16121e-07	0.001	GO:0019843	rRNA binding
55	197	0.985092	5.00689e-30	<0.001	GO:0016072	rRNA metabolic process
12	41	0.980062	9.78549e-08	<0.001	GO:0006418	tRNA aminoacylation for protein translation
64	238	0.971371	7.71256e-34	<0.001	GO:0072594	establishment of protein localization to organelle
11	39	0.957841	5.12524e-07	<0.001	GO:0046939	nucleotide phosphorylation
12	43	0.951481	1.75543e-07	<0.001	GO:0043039	tRNA aminoacylation
10	36	0.948994	1.99281e-06	0.002	GO:0046364	monosaccharide biosynthetic process
12	44	0.937863	2.31993e-07	<0.001	GO:0043038	amino acid activation
64	252	0.937203	3.11339e-32	<0.001	GO:0072657	protein localization to membrane
70	284	0.925633	2.31436e-34	<0.001	GO:0043603	cellular amide metabolic process
11	43	0.900619	1.50244e-06	0.002	GO:0051287	NAD binding
10	40	0.887757	5.68309e-06	0.014	GO:0009135	purine nucleoside diphosphate metabolic process
10	40	0.887757	5.68309e-06	0.014	GO:0009179	purine ribonucleoside diphosphate metabolic process
13	52	0.887286	2.22447e-07	<0.001	GO:0038061	NIK/NF-kappaB signaling
26	108	0.872036	4.75204e-13	<0.001	GO:0043209	myelin sheath
60	266	0.864262	3.39008e-27	<0.001	GO:0034655	nucleobase-containing compound catabolic process
10	42	0.860081	9.12345e-06	0.024	GO:0009185	ribonucleoside diphosphate metabolic process
68	313	0.85067	9.46273e-30	<0.001	GO:0005198	structural molecule activity
62	284	0.847567	2.96685e-27	<0.001	GO:0019439	aromatic compound catabolic process
61	279	0.847457	7.4225e-27	<0.001	GO:0046700	heterocycle catabolic process
61	281	0.843407	1.12251e-26	<0.001	GO:0044270	cellular nitrogen compound catabolic process
62	292	0.831852	1.51277e-26	<0.001	GO:1901361	organic cyclic compound catabolic process
11	50	0.815584	7.40756e-06	0.016	GO:0009132	nucleoside diphosphate metabolic process
14	64	0.812158	4.53717e-07	<0.001	GO:0072524	pyridine-containing compound metabolic process
13	60	0.806822	1.31682e-06	0.002	GO:0019362	pyridine nucleotide metabolic process
13	60	0.806822	1.31682e-06	0.002	GO:0046034	ATP metabolic process
13	60	0.806822	1.31682e-06	0.002	GO:0046496	nicotinamide nucleotide metabolic process
19	91	0.787986	9.02727e-09	<0.001	GO:0043618	regulation of transcription from RNA polymerase II promoter in response to stress
59	301	0.784383	2.23712e-23	<0.001	GO:0034470	ncRNA processing
60	308	0.78189	1.27921e-23	<0.001	GO:0005924	cell-substrate adherens junction
60	308	0.78189	1.27921e-23	<0.001	GO:0005925	focal adhesion
12	58	0.781651	5.6363e-06	0.013	GO:0031146	SCF-dependent proteasomal ubiquitin-dependent protein catabolic process
60	309	0.780099	1.52736e-23	<0.001	GO:0030055	cell-substrate junction
15	73	0.777928	4.19396e-07	<0.001	GO:0006006	glucose metabolic process
15	74	0.770521	5.05407e-07	<0.001	GO:0016051	carbohydrate biosynthetic process
37	189	0.764682	5.9305e-15	<0.001	GO:0031012	extracellular matrix
13	65	0.763127	3.43237e-06	0.009	GO:0061418	regulation of transcription from RNA polymerase II promoter in response to hypoxia
19	96	0.758792	2.28324e-08	<0.001	GO:0043620	regulation of DNA-templated transcription in response to stress
12	62	0.745629	1.16611e-05	0.031	GO:0002576	platelet degranulation
66	366	0.745045	5.80445e-24	<0.001	GO:0033365	protein localization to organelle
74	423	0.736044	5.2242e-26	<0.001	GO:0006886	intracellular protein transport
81	481	0.722029	2.48747e-27	<0.001	GO:1901566	organonitrogen compound biosynthetic process
14	76	0.719017	4.04049e-06	0.011	GO:0042470	melanosome
14	76	0.719017	4.04049e-06	0.011	GO:0048770	pigment granule
13	71	0.715855	9.57304e-06	0.026	GO:0006733	oxidoreduction coenzyme metabolic process
63	368	0.714054	1.23917e-21	<0.001	GO:0005912	adherens junction
64	377	0.710413	9.07205e-22	<0.001	GO:0070161	anchoring junction
70	420	0.70597	2.60515e-23	<0.001	GO:0034660	ncRNA metabolic process
13	73	0.701163	1.31303e-05	0.034	GO:0070498	interleukin-1-mediated signaling pathway
14	80	0.691892	7.56178e-06	0.016	GO:0002220	innate immune response activating cell surface receptor signaling pathway
14	80	0.691892	7.56178e-06	0.016	GO:0002223	stimulatory C-type lectin receptor signaling pathway
189	1593	0.652261	1.24007e-44	<0.001	GO:0065010	extracellular membrane-bounded organelle
189	1593	0.652261	1.24007e-44	<0.001	GO:0070062	extracellular exosome
189	1599	0.650088	2.21495e-44	<0.001	GO:0043230	extracellular organelle
189	1599	0.650088	2.21495e-44	<0.001	GO:1903561	extracellular vesicle
71	477	0.64625	1.0693e-20	<0.001	GO:0044802	single-organism membrane organization
76	515	0.646178	6.36636e-22	<0.001	GO:1902580	single-organism cellular localization
80	549	0.643098	9.9788e-23	<0.001	GO:0044265	cellular macromolecule catabolic process
15	95	0.638276	1.32233e-05	0.037	GO:0038095	Fc-epsilon receptor signaling pathway
15	96	0.632868	1.50595e-05	0.041	GO:0019318	hexose metabolic process
17	109	0.632169	4.19721e-06	0.011	GO:0005996	monosaccharide metabolic process
115	867	0.626613	2.19583e-29	<0.001	GO:1901564	organonitrogen compound metabolic process
198	1789	0.624344	1.63255e-42	<0.001	GO:0031988	membrane-bounded vesicle
78	556	0.621035	4.18679e-21	<0.001	GO:0030529	intracellular ribonucleoprotein complex
78	559	0.618177	5.8726e-21	<0.001	GO:1990904	ribonucleoprotein complex
201	1851	0.617393	4.96288e-42	<0.001	GO:0044421	extracellular region part
75	549	0.604291	1.3489e-19	<0.001	GO:0034613	cellular protein localization
19	129	0.603209	2.77466e-06	0.003	GO:0002218	activation of innate immune response
200	1886	0.601995	3.91708e-40	<0.001	GO:0031982	vesicle
85	636	0.601604	1.35259e-21	<0.001	GO:0009057	macromolecule catabolic process
75	553	0.600453	2.07879e-19	<0.001	GO:0070727	cellular macromolecule localization
31	215	0.598208	3.28045e-09	<0.001	GO:0006091	generation of precursor metabolites and energy
17	118	0.591429	1.25305e-05	0.031	GO:0002758	innate immune response-activating signal transduction
79	603	0.585678	1.63837e-19	<0.001	GO:0061024	membrane organization
26	184	0.584944	9.53084e-08	<0.001	GO:0060205	cytoplasmic membrane-bounded vesicle lumen
18	127	0.583292	8.80911e-06	0.022	GO:0016874	ligase activity
26	185	0.582167	1.06503e-07	<0.001	GO:0031983	vesicle lumen
21	149	0.581345	1.73339e-06	0.002	GO:0045089	positive regulation of innate immune response
25	178	0.581325	1.90406e-07	<0.001	GO:0034774	secretory granule lumen
28	202	0.576175	4.62102e-08	<0.001	GO:0006520	cellular amino acid metabolic process
67	513	0.573795	1.67987e-16	<0.001	GO:0016071	mRNA metabolic process
100	835	0.556915	7.59821e-22	<0.001	GO:0044248	cellular catabolic process
20	149	0.556194	6.54711e-06	0.016	GO:0034976	response to endoplasmic reticulum stress
42	321	0.555517	1.1136e-10	<0.001	GO:0005615	extracellular space
110	945	0.55103	3.83371e-23	<0.001	GO:1901575	organic substance catabolic process
114	1002	0.542521	3.34882e-23	<0.001	GO:0009056	catabolic process
33	256	0.542009	1.76905e-08	<0.001	GO:0045296	cadherin binding
79	657	0.540501	2.92508e-17	<0.001	GO:0016482	cytoplasmic transport
87	739	0.536193	1.98578e-18	<0.001	GO:0051641	cellular localization
21	166	0.526597	9.9012e-06	0.026	GO:0098602	single organism cell adhesion
23	186	0.515852	5.52613e-06	0.012	GO:0031349	positive regulation of defense response
56	472	0.515304	3.88379e-12	<0.001	GO:0019752	carboxylic acid metabolic process
94	849	0.509771	4.13096e-18	<0.001	GO:1902582	single-organism intracellular transport
38	316	0.509767	9.90358e-09	<0.001	GO:0050839	cell adhesion molecule binding
39	328	0.504664	8.62453e-09	<0.001	GO:0010608	posttranscriptional regulation of gene expression
22	185	0.495908	1.65574e-05	0.049	GO:0045088	regulation of innate immune response
130	1290	0.491796	8.45155e-22	<0.001	GO:0003723	RNA binding
82	756	0.488917	3.03431e-15	<0.001	GO:0015031	protein transport
41	360	0.48409	1.23922e-08	<0.001	GO:0016491	oxidoreductase activity
56	504	0.481625	5.40612e-11	<0.001	GO:0055114	oxidation-reduction process
86	811	0.480294	2.13835e-15	<0.001	GO:0045184	establishment of protein localization
29	256	0.474568	2.04602e-06	0.002	GO:0001817	regulation of cytokine production
58	536	0.469486	6.84642e-11	<0.001	GO:0006082	organic acid metabolic process
72	682	0.467015	7.92648e-13	<0.001	GO:0030054	cell junction
101	1002	0.465843	1.31593e-16	<0.001	GO:0046907	intracellular transport
57	532	0.463715	1.50568e-10	<0.001	GO:0043436	oxoacid metabolic process
136	1445	0.459737	3.89645e-20	<0.001	GO:0051649	establishment of localization in cell
70	671	0.459353	3.08959e-12	<0.001	GO:0006396	RNA processing
67	644	0.45574	1.10584e-11	<0.001	GO:0043233	organelle lumen
28	259	0.450759	7.6211e-06	0.018	GO:0044283	small molecule biosynthetic process
71	698	0.447021	7.0747e-12	<0.001	GO:0031974	membrane-enclosed lumen
152	1763	0.425541	4.97813e-19	<0.001	GO:0044765	single-organism transport
49	489	0.424381	3.00158e-08	<0.001	GO:0005576	extracellular region
398	8153	0.416657	7.68718e-10	<0.001	GO:0044424	intracellular part
38	384	0.411677	1.60974e-06	0.002	GO:0006887	exocytosis
332	5681	0.410249	1.78089e-18	<0.001	GO:0044444	cytoplasmic part
241	3393	0.405243	3.77044e-21	<0.001	GO:0005829	cytosol
157	1908	0.403415	9.60353e-18	<0.001	GO:1902578	single-organism localization
346	6191	0.399643	2.61369e-16	<0.001	GO:0044699	single-organism process
96	1074	0.397905	1.7411e-12	<0.001	GO:0033036	macromolecule localization
51	540	0.395694	1.05243e-07	<0.001	GO:0070013	intracellular organelle lumen
350	6361	0.392885	2.1649e-15	<0.001	GO:0043226	organelle
94	1062	0.391206	5.6337e-12	<0.001	GO:0008104	protein localization
328	5683	0.386929	7.77414e-17	<0.001	GO:0043227	membrane-bounded organelle
53	577	0.382842	1.43598e-07	<0.001	GO:0044433	cytoplasmic vesicle part
46	497	0.382606	8.32948e-07	0.001	GO:0043066	negative regulation of apoptotic process
163	2110	0.372032	7.95263e-16	<0.001	GO:0006810	transport
46	508	0.371624	1.53691e-06	0.002	GO:0043069	negative regulation of programmed cell death
315	5401	0.368112	4.01663e-16	<0.001	GO:0044763	single-organism cellular process
93	1104	0.364246	1.20962e-10	<0.001	GO:0071702	organic substance transport
403	8540	0.36241	7.3684e-07	<0.001	GO:0044464	cell part
166	2198	0.361327	3.22095e-15	<0.001	GO:0051234	establishment of localization
380	7618	0.356477	9.06064e-10	<0.001	GO:0009987	cellular process
49	560	0.356068	1.84945e-06	0.002	GO:0060548	negative regulation of cell death
402	8533	0.349072	1.41402e-06	0.002	GO:0008150	biological_process
76	914	0.346093	1.57826e-08	<0.001	GO:0002376	immune system process
174	2468	0.326793	3.56785e-13	<0.001	GO:0051179	localization
104	1347	0.325152	1.17076e-09	<0.001	GO:0042221	response to chemical
403	8642	0.323411	1.14884e-05	0.031	GO:0003674	molecular_function
50	618	0.317243	1.3185e-05	0.034	GO:0009719	response to endogenous stimulus
75	975	0.305064	4.93791e-07	<0.001	GO:0044281	small molecule metabolic process
66	852	0.30364	2.12512e-06	0.002	GO:0043067	regulation of programmed cell death
65	839	0.303151	2.56083e-06	0.002	GO:0042981	regulation of apoptotic process
54	692	0.301069	1.63578e-05	0.043	GO:0044429	mitochondrial part
81	1075	0.297736	3.714e-07	<0.001	GO:0010033	response to organic substance
69	921	0.288078	3.94656e-06	0.011	GO:0010941	regulation of cell death
199	3108	0.287283	3.31059e-11	<0.001	GO:0032991	macromolecular complex
161	2405	0.284429	3.98244e-10	<0.001	GO:0050896	response to stimulus
339	6646	0.265389	3.98885e-08	<0.001	GO:0005515	protein binding
382	8031	0.26487	9.5116e-06	0.026	GO:0005488	binding
225	3779	0.260122	9.0734e-10	<0.001	GO:0097159	organic cyclic compound binding
225	3797	0.256614	1.48893e-09	<0.001	GO:0016020	membrane
167	2629	0.256486	9.72509e-09	<0.001	GO:0003676	nucleic acid binding
223	3756	0.25619	1.6176e-09	<0.001	GO:1901363	heterocyclic compound binding
101	1496	0.250407	1.9928e-06	0.002	GO:0006950	response to stress
308	5850	0.248678	2.86455e-08	<0.001	GO:0044422	organelle part
304	5769	0.243704	4.31029e-08	<0.001	GO:0044446	intracellular organelle part
302	5728	0.241415	5.18917e-08	<0.001	GO:0008152	metabolic process
184	3046	0.236452	5.46854e-08	<0.001	GO:0016043	cellular component organization
153	2454	0.23544	2.31116e-07	<0.001	GO:0019538	protein metabolic process
184	3065	0.232336	8.97171e-08	<0.001	GO:0071840	cellular component organization or biogenesis
285	5368	0.226515	1.65324e-07	<0.001	GO:0044237	cellular metabolic process
152	2493	0.22115	1.1029e-06	0.002	GO:0044710	single-organism metabolic process
169	2828	0.219185	6.76455e-07	<0.001	GO:0009058	biosynthetic process
134	2185	0.214241	5.19116e-06	0.012	GO:0044271	cellular nitrogen compound biosynthetic process
132	2158	0.211613	7.3132e-06	0.016	GO:0044267	cellular protein metabolic process
296	5738	0.210208	1.6042e-06	0.002	GO:0043229	intracellular organelle
164	2791	0.205299	3.46642e-06	0.009	GO:1901576	organic substance biosynthetic process
187	3263	0.203205	2.23993e-06	0.002	GO:0034641	cellular nitrogen compound metabolic process
194	3463	0.19203	6.3175e-06	0.015	GO:0006807	nitrogen compound metabolic process
260	4987	0.18386	1.22877e-05	0.031	GO:0043231	intracellular membrane-bounded organelle

## Sheet: Supplementary file_6
genes	logFC	logCPM	F	PValue	FDR
FAXDC2-201	-3.95733	1.17314	13.2349	0.000586401	0.041796
SGPP2-201	-2.77751	1.95738	12.3439	0.000865654	0.0566147
ELOVL7-205	-2.31744	4.21179	14.1553	0.000394758	0.0297393
MALT1-202	2.31663	5.28818	19.9571	3.73033e-05	0.0037629
VASH1-201	2.01983	2.61212	25.6069	4.52828e-06	0.000550001
D2HGDH-201	1.91692	4.03901	24.4147	6.97068e-06	0.000821505
ZNF571-201	-1.78628	3.03972	11.9763	0.00101846	0.0651761
MICU3-201	-1.77485	2.90513	10.7437	0.00177208	0.0943704
NUDT17-201	1.76817	2.15543	10.6049	0.00188777	0.0981229
SLC7A8-201	1.70843	4.15862	13.2362	0.000586059	0.041796
MAOA-201	1.70006	3.72085	10.985	0.00158826	0.0864102
IQSEC2-201	1.56355	2.84395	11.1622	0.00146609	0.0843035
KCNK5-201	1.46315	3.30768	11.1097	0.00150125	0.0850921
P2RY1-201	-1.46255	3.57996	12.714	0.000735767	0.0496137
ZNF782-205	-1.32214	2.92935	12.6393	0.000760222	0.0508367
ZBTB21-201	-1.28749	6.02814	19.6895	4.13981e-05	0.00400619
CTSD-201	1.2813	5.46897	20.7708	2.72445e-05	0.00281992
GREB1-204	1.21886	4.24766	18.8472	5.76196e-05	0.00548677
RPS12-201	1.21385	8.33651	140.728	3.90384e-17	4.64674e-13
AMPH-202	1.19937	4.16676	11.6789	0.00116265	0.0720785
RPS19-206	1.13421	9.21467	116.424	1.75708e-15	1.04573e-11
SLC25A6-201	1.07682	7.74501	84.3446	6.70335e-13	7.25364e-10
SLC25A15-201	1.07666	4.02009	14.6559	0.000319163	0.0245096
EEF1A1-202	1.07069	12.6738	87.6275	3.43756e-13	5.11465e-10
RPS10-206	1.0511	5.3886	26.4688	3.329e-06	0.000408505
RPS18-230	1.04911	9.8297	80.7616	1.41493e-12	1.203e-09
RPL13A-201	1.03603	10.6844	100.663	2.79739e-14	5.54956e-11
NDUFB6-203	-1.02881	7.20001	16.738	0.000134398	0.0120281
RPS25-202	1.0171	8.45783	81.3716	1.24422e-12	1.13922e-09
RPS27-201	1.01634	8.53624	101.104	2.57933e-14	5.54956e-11
RPLP2-201	1.01121	9.43155	108.114	7.3131e-15	2.90159e-11
TOMM22-201	1.00651	5.62846	26.6319	3.14199e-06	0.000393674
EEF2-201	1.00194	12.341	91.7712	1.51185e-13	2.5708e-10
STYX-201	-0.988107	4.31079	14.2783	0.0003746	0.0284004
RPL27A-201	0.96732	9.1847	67.7095	2.56788e-11	1.22262e-08
HELZ2-204	0.948275	4.46792	12.4887	0.000812186	0.0537081
RPL34-203	0.944295	8.65659	72.5743	8.42149e-12	5.27584e-09
RPL3-201	0.94249	10.9901	74.4095	5.59131e-12	4.15959e-09
RPS5-202	0.933246	8.97676	71.3288	1.11574e-11	6.64033e-09
RPL37A-210	0.926547	8.79266	75.4443	4.44963e-12	3.53093e-09
RPL10-204	0.922341	9.85452	56.0406	4.50994e-10	1.41268e-07
PABPC1-201	0.913894	9.4013	103.361	1.70865e-14	5.08453e-11
RPL12-201	0.912846	8.96273	86.3177	4.47878e-13	5.86932e-10
PSMC3IP-202	-0.907438	4.57906	21.0816	2.41871e-05	0.00257053
RPL18A-201	0.886679	9.50126	73.8624	6.31363e-12	4.42065e-09
RPS3A-201	0.880159	10.5755	53.9588	7.76185e-10	2.2534e-07
TMEM109-201	0.874	6.06314	15.2427	0.00024936	0.0201929
RPS20-208	0.862551	7.87273	62.8047	8.27186e-11	3.17613e-08
SHANK3-201	0.85888	4.49655	14.7412	0.000307864	0.0238845
RPS2-201	0.85769	11.1252	85.8446	4.93096e-13	5.86932e-10
RPS9-201	0.84428	8.47471	44.1609	1.16023e-08	2.60571e-06
RPL37-201	0.838969	8.94307	67.8838	2.46546e-11	1.22262e-08
RPL17-205	0.836034	5.88705	18.538	6.51242e-05	0.00610373
RPS21-201	0.830724	7.5253	42.4122	1.93423e-08	3.77428e-06
RPS27A-201	0.830503	8.6329	56.12	4.41838e-10	1.41268e-07
GTF2E1-201	0.829697	5.01547	11.0881	0.00151591	0.0851125
TMEM147-201	0.825934	5.56458	11.3249	0.00136248	0.0802849
RPL26-209	0.822649	8.53589	34.7661	2.02936e-07	3.13708e-05
RPL32-204	0.818287	9.21145	36.5346	1.15748e-07	1.94049e-05
SHQ1-201	0.814915	5.89323	11.0298	0.00155642	0.0864102
NOP53-201	0.814127	6.61765	35.9329	1.39938e-07	2.28175e-05
UBA52-202	0.812474	8.54655	61.2737	1.20374e-10	4.34186e-08
RPS13-202	0.807731	9.07883	57.6154	3.01118e-10	9.95612e-08
RPS29-205	0.802645	7.23122	31.4867	5.92869e-07	8.50231e-05
RPS16-201	0.800339	8.77259	70.5808	1.3229e-11	7.15751e-09
RPS28-203	0.797706	7.55776	43.9917	1.21856e-08	2.68602e-06
RPS6-204	0.795997	10.6421	72.6046	8.3643e-12	5.27584e-09
RPS3-217	0.794164	10.2832	67.1238	2.94553e-11	1.34849e-08
EIF3L-214	0.785625	8.80053	63.4307	7.10546e-11	2.81921e-08
RACK1-227	0.783061	11.4985	65.3897	4.43885e-11	1.88699e-08
POLR2I-201	0.77607	5.23428	10.673	0.00183006	0.0959613
RPL31-201	0.770691	9.35024	50.9413	1.73754e-09	4.49606e-07
RPSA-201	0.757828	10.0442	81.5457	1.19953e-12	1.13922e-09
RPS11-201	0.753406	9.4694	58.1157	2.65166e-10	9.01793e-08
RPL28-201	0.751167	8.59802	52.7239	1.07645e-09	2.97978e-07
RPL7A-202	0.744337	10.7577	64.3137	5.74227e-11	2.35691e-08
POLR2F-205	0.742839	5.04755	11.4215	0.00130461	0.0776437
RPL35A-206	0.740249	9.00296	53.821	8.04885e-10	2.28108e-07
CCNG1-201	0.740095	7.30812	35.0481	1.85414e-07	2.90393e-05
RPL18-208	0.73672	9.4049	68.5814	2.09602e-11	1.08473e-08
RPS8-202	0.735125	10.6071	65.4458	4.37989e-11	1.88699e-08
RPL29-202	0.732724	9.17263	55.2439	5.54471e-10	1.69227e-07
RPL11-206	0.721241	9.80676	70.7617	1.2694e-11	7.15751e-09
RPS14-202	0.716031	9.18375	51.1084	1.66069e-09	4.39272e-07
RPS15A-201	0.710003	9.74282	37.2326	9.30278e-08	1.6048e-05
RPL9-214	0.708939	9.8308	43.8586	1.26657e-08	2.74109e-06
RPL8-201	0.702162	10.4	60.7005	1.38704e-10	4.85587e-08
RPL30-209	0.701299	7.71376	19.8119	3.94705e-05	0.00388279
AHCY-201	0.697457	8.08757	35.1912	1.77135e-07	2.81126e-05
FTL-201	0.695816	5.70785	13.5103	0.000520544	0.0382471
EIF3F-208	0.690888	7.71213	29.5585	1.136e-06	0.000153657
SHOC2-202	-0.688445	5.91159	12.8169	0.00070339	0.0486771
PPP1R12C-201	0.685087	4.34191	11.1102	0.0015009	0.0850921
RPL15-201	0.677373	10.2579	62.2339	9.50819e-11	3.53675e-08
RPL36-203	0.675533	9.30106	47.2883	4.75687e-09	1.11022e-06
RPL21-202	0.675532	9.15944	30.683	7.76014e-07	0.000109963
WDR34-201	0.672363	5.41537	13.4934	0.000524356	0.0382909
RPL5-208	0.671725	11.8036	48.6195	3.28191e-09	7.97237e-07
HNRNPLL-209	-0.671537	6.24516	10.6537	0.00184619	0.0963825
ZBTB7A-201	0.670025	4.40613	11.9137	0.0010472	0.0666571
EEF1A2-201	0.668337	7.36228	29.7926	1.04888e-06	0.00014688
RPS24-202	0.663469	9.49135	42.6982	1.778e-08	3.62555e-06
NCAPH2-205	0.662633	6.17071	20.6025	2.90651e-05	0.00295693
RPL13-201	0.661651	10.3158	52.636	1.10195e-09	2.98104e-07
NOA1-201	0.661598	5.73644	15.9944	0.000182413	0.0159652
RPL22-201	0.661244	8.05957	42.8766	1.68718e-08	3.52326e-06
AZIN1-201	-0.660765	6.03949	10.97	0.00159909	0.0865179
RPLP0-219	0.658875	10.0426	54.4502	6.82184e-10	2.03001e-07
EEF1D-205	0.640711	8.46207	49.3764	2.66322e-09	6.60422e-07
FTH1-201	0.637777	7.89321	23.8391	8.60619e-06	0.00096641
NOB1-201	0.633687	6.68587	24.1985	7.54336e-06	0.000868085
EIF4B-201	0.632683	9.55016	42.5037	1.88272e-08	3.73501e-06
DVL1-202	0.63245	4.83268	11.0902	0.00151448	0.0851125
RPLP1-201	0.630416	9.51948	47.9149	3.99193e-09	9.50319e-07
NDUFB11-202	0.62847	6.62983	14.5772	0.00032997	0.0251771
KIAA1671-201	0.627853	5.60133	13.9332	0.000434038	0.0323568
RPS4X-201	0.623368	11.4919	42.6619	1.79709e-08	3.62555e-06
EIF3H-209	0.623129	8.31406	38.289	6.70454e-08	1.17359e-05
EEF1B2-203	0.617125	9.09864	49.4743	2.59253e-09	6.56573e-07
RPS23-201	0.610968	9.54839	40.9774	2.96257e-08	5.34295e-06
NAP1L1-227	0.610622	10.0212	41.3396	2.65867e-08	4.86863e-06
TPT1-212	0.605464	8.74109	32.9113	3.70244e-07	5.37441e-05
QARS-201	0.601987	7.72724	29.7278	1.07227e-06	0.00014841
GSPT2-201	0.601329	5.16498	11.2467	0.00141127	0.0827504
RPL27-206	0.598344	9.95066	41.698	2.3896e-08	4.51483e-06
ARF5-201	0.591947	6.08261	11.0181	0.00156468	0.0864102
ATP5F1D-201	0.591552	6.67064	15.8872	0.000190682	0.0164471
RPL10A-201	0.591467	9.51855	24.7743	6.1156e-06	0.00072794
MAN1A2-201	-0.586093	6.51234	21.4489	2.10277e-05	0.00225489
DNAH14-208	-0.578554	6.01325	11.2185	0.0014293	0.0829899
RPS15-209	0.578309	11.126	46.8956	5.3123e-09	1.216e-06
CPSF1-212	0.576326	7.47601	22.4842	1.4228e-05	0.00156811
RPL38-201	0.568815	8.83214	28.227	1.79623e-06	0.000237562
AP2A1-201	0.568643	6.82781	19.8922	3.82568e-05	0.00379476
RPL14-201	0.568269	10.194	34.1343	2.487e-07	3.74718e-05
RPL22L1-201	0.560567	6.14419	10.8898	0.00165832	0.0889144
ILF3-219	0.55322	9.43495	41.5389	2.50542e-08	4.65968e-06
RPL7-201	0.551156	10.059	24.2462	7.41294e-06	0.000865061
YBX1-201	0.550413	10.6398	43.6825	1.33313e-08	2.83362e-06
H1F0-201	-0.545119	6.79478	15.4283	0.000230751	0.0190738
INTS13-201	0.544883	7.13077	22.266	1.54413e-05	0.00167089
RPL24-201	0.541621	9.58976	36.3944	1.20968e-07	1.99984e-05
GAPDH-201	0.539356	11.2936	42.1447	2.09325e-08	4.01871e-06
RPL6-202	0.538015	11.0138	40.6774	3.2415e-08	5.75873e-06
EIF3G-201	0.531501	7.85738	27.0312	2.72861e-06	0.000345517
OAZ1-211	0.531486	6.75315	22.3917	1.47299e-05	0.00160854
ELOB-203	0.530807	6.33214	15.4615	0.000227574	0.0190738
NAA10-208	0.528163	7.40411	22.5749	1.3753e-05	0.00152992
FASN-201	0.520901	10.372	29.5929	1.12274e-06	0.000153609
RPL19-201	0.517046	10.9197	35.6668	1.5225e-07	2.44896e-05
PCBP2-207	0.514334	9.73673	36.7018	1.0983e-07	1.86758e-05
ARF1-214	0.514108	7.7913	17.3946	0.00010294	0.00935342
RPS7-205	0.512918	9.97682	33.5816	2.97491e-07	4.37165e-05
RPL35-201	0.512772	9.62848	34.3202	2.34223e-07	3.57431e-05
ACTG1-210	0.50899	11.2258	33.928	2.65863e-07	3.95571e-05
IBTK-201	-0.507188	6.58141	11.7763	0.00111323	0.069741
PFKM-203	0.496778	7.26111	11.4508	0.0012876	0.0770168
HNRNPA1-203	0.488865	7.67795	18.2289	7.36446e-05	0.00684837
VIM-209	0.488696	9.72856	28.1175	1.86583e-06	0.000241401
RPL4-201	0.487961	11.375	28.0863	1.8862e-06	0.000241414
IPO5-202	0.484966	9.48101	28.1247	1.86118e-06	0.000241401
NHP2-201	0.484458	7.57248	15.1657	0.000257533	0.0206017
EIF3E-201	0.478601	9.5022	26.4967	3.29629e-06	0.000408505
SNRPD2-201	0.477016	8.14189	11.4802	0.00127074	0.0763918
UBE2S-201	0.475129	7.31206	15.5926	0.000215487	0.018321
EIF2A-203	0.474603	7.22644	13.1962	0.000596321	0.0420001
SF3A2-201	0.473875	6.62026	15.5261	0.000221533	0.0187015
FN1-205	0.465947	7.39201	10.5596	0.00192718	0.0993041
CLTB-201	0.464082	6.31336	11.0086	0.00157144	0.0864102
BAG6-234	0.460091	8.26211	20.7792	2.71575e-05	0.00281992
CRTAP-201	0.457488	6.77338	11.7329	0.00113495	0.0707296
CSDE1-203	0.455396	9.79883	28.6648	1.54374e-06	0.000206462
TOMM40-203	0.454478	6.74958	15.2425	0.000249379	0.0201929
IMPDH2-201	0.453836	9.03981	24.1199	7.76349e-06	0.000880084
STAU1-207	0.450623	7.56189	16.4936	0.00014853	0.0131936
TRIR-201	0.450487	6.33113	10.9895	0.00158503	0.0864102
THOC5-216	0.446626	7.27899	15.1624	0.000257889	0.0206017
SRSF2-203	0.443202	7.06246	11.574	0.00121844	0.0747582
CDC20-202	0.440908	7.71767	15.2501	0.000248588	0.0201929
SLC25A3-203	0.435217	9.18001	17.0967	0.000116137	0.0104726
DDOST-202	0.431651	8.32632	13.2157	0.00059129	0.0418936
BOP1-205	0.431183	7.32932	13.6943	0.000480902	0.0355539
NPM1-201	0.429495	11.6284	24.1836	7.58471e-06	0.000868085
PSMB5-202	0.42768	7.46677	11.5616	0.00122525	0.0747903
RPL23A-204	0.426117	10.7337	24.832	5.98895e-06	0.000720066
IREB2-201	-0.425619	7.6292	12.6048	0.000771823	0.0513241
TKT-208	0.416673	9.16767	20.9155	2.57746e-05	0.002715
MARS-201	0.414119	8.77997	17.6533	9.27411e-05	0.00849152
CDT1-201	0.413857	6.83933	10.7291	0.00178387	0.0943704
HDGFL2-208	0.413535	7.36258	14.7352	0.000308646	0.0238845
OLA1-201	0.41159	8.27757	16.0029	0.00018177	0.0159652
RPL23-206	0.410504	10.044	19.4642	4.52074e-05	0.00433955
SLC25A5-201	0.404495	9.87252	18.7956	5.88069e-05	0.00555538
INTS1-201	0.403996	7.50075	11.5084	0.00125478	0.0758157
PTPRS-205	0.402421	7.30866	12.7078	0.000737765	0.0496137
ATF4-201	-0.398973	8.71539	15.4367	0.000229947	0.0190738
PRPS1-204	0.398494	8.00097	12.02	0.000998929	0.0642716
PSMC4-201	0.397518	7.55205	12.7409	0.000727154	0.0496137
CAPRIN1-201	0.395759	9.60034	19.7628	4.0232e-05	0.00392525
NONO-201	0.393654	10.1507	20.6411	2.8637e-05	0.0029385
CS-201	0.393445	8.51267	12.7919	0.000711107	0.0489266
IRAK1-203	0.389617	6.69146	11.2072	0.0014366	0.0830087
SEC13-202	0.389224	7.0185	10.9828	0.00158984	0.0864102
PRRC2B-202	0.38241	8.40958	19.9195	3.78517e-05	0.00378612
SPTBN2-209	0.381213	6.80388	10.6928	0.00181364	0.0955209
DHX30-205	0.378441	8.08503	15.0364	0.000271882	0.0215747
BTF3-201	0.376922	8.97553	13.9284	0.000434939	0.0323568
RBM12-203	0.372358	7.65707	10.9386	0.00162201	0.0873613
HSPA8-224	0.369186	11.3167	15.9466	0.000186052	0.0161648
RAC1-202	0.368258	7.7432	11.5311	0.00124207	0.0754306
IPO7-201	0.36768	9.21408	12.8467	0.000694289	0.0483282
PRKCSH-209	0.366756	8.66159	14.9829	0.000278067	0.0219194
NOL7-202	0.365137	7.20726	11.219	0.001429	0.0829899
UBAP2L-207	0.358945	9.12368	17.8845	8.45167e-05	0.00779847
FBL-201	0.357272	8.59584	11.8934	0.0010567	0.0669038
FXR1-202	0.35697	8.27637	12.7301	0.000730575	0.0496137
FLII-201	0.354269	7.57147	11.5803	0.00121501	0.0747582
TUFM-201	0.348204	9.109	14.7324	0.000309015	0.0238845
NSA2-205	0.342401	7.76736	11.407	0.00131314	0.0777625
HDLBP-203	0.339406	9.88235	15.7519	0.000201681	0.0172706
HNRNPDL-208	0.336083	9.25496	10.731	0.00178233	0.0943704
SND1-201	0.326254	9.07605	12.2014	0.000921828	0.0596332
SF3A1-201	0.325156	8.69143	12.2791	0.00089072	0.0579357
HSP90AB1-202	0.321083	12.1183	13.4483	0.000534661	0.0388053
MYH9-201	0.319948	9.83697	13.2403	0.000585033	0.041796
FLNA-202	0.310236	9.72833	12.4714	0.000818396	0.0538197
GPI-220	0.307544	9.3913	11.0434	0.00154687	0.0864102
CSE1L-201	0.298395	10.2296	11.1244	0.00149129	0.0850921
NACA-201	0.297792	10.0718	13.0079	0.000647163	0.0453128
SF3B2-201	0.293203	9.72479	11.8673	0.00106903	0.067326
PRRC2A-202	0.27386	9.40775	10.5888	0.00190172	0.098418

## Sheet: Supplementary file_7
# species: Homo sapiens
# support: EXP, IMP, ISS, ISM, TAS, IEA, HMP, HEP, IDA, IGI, ISO, IGC, NAS, HGI, IPI, IEP, ISA, RCA, IC, HDA
# associations retrieved on: 2021-06-07 10:48:50-04
# gofunc built on: 2018-02-21 10:04:34.764444-05
# gene associations file: ftp://ftp.geneontology.org/pub/go/gene-associations/goa_human.gaf.gz
# revision: 2018-02-02 $
# downloaded on: 2018-02-14 09:47:26-05
# GO DAG files from: http://archive.geneontology.org/latest-full/go_201512-termdb-tables.tar.gz
# downloaded on: 2015-12-22 05:43:21-05
# translation required: yes
# translation info:
# authority: ensembl
# synergizer db built on: 2015-11-17 14:24:21.26681-05
# synergizer db built from: Ensembl Genes 82 / Metazoa Mart / Plant Mart
# namespace: hgnc_symbol
# coverage: 99.8%
# size of "genespace": 11880
# number of attributes: 17999
# NOTE: these associations have been restricted to the genes included
# in the user-supplied gene space.
# NOTE: the last record consists of all the entities in the
# "genespace" that are not associated with any attribute (for
# the requested support).
# Original number of entities in query: 166
# Number of entities in query: 166
# Total number of entities: 11880
# Total number of attributes: 17999
# Original total number of attributes: 20270
# Translation required: yes
# Translation coverage: 0.997782
# Mode: unordered
# Number of simulations: 1000
# Adjusted P-value cutoff: 0.05
# Over/under: over
# Evidence codes: EXP, IMP, ISS, ISM, TAS, IEA, HMP, HEP, IDA, IGI, ISO, IGC, NAS, HGI, IPI, IEP, ISA, RCA, IC, HDA
OVERREPRESENTED ATTRIBUTES
N	X	LOD	P	P_adj	attrib ID	attrib name
29	30	3.22411	3.73036e-54	<0.001	GO:0022627	cytosolic small ribosomal subunit
44	48	2.97559	9.42068e-80	<0.001	GO:0022625	cytosolic large ribosomal subunit
73	85	2.86684	4.02082e-130	<0.001	GO:0006614	SRP-dependent cotranslational protein targeting to membrane
4	4	2.81211	3.67771e-08	<0.001	GO:0005853	eukaryotic translation elongation factor 1 complex
73	89	2.74612	5.22824e-127	<0.001	GO:0006613	cotranslational protein targeting to membrane
73	89	2.74612	5.22824e-127	<0.001	GO:0045047	protein targeting to ER
73	93	2.6517	3.05376e-124	<0.001	GO:0072599	establishment of protein localization to endoplasmic reticulum
73	95	2.6112	5.81107e-123	<0.001	GO:0070972	protein localization to endoplasmic reticulum
17	20	2.59294	1.40627e-29	<0.001	GO:0002181	cytoplasmic translation
75	110	2.43372	9.76573e-120	<0.001	GO:0000184	nuclear-transcribed mRNA catabolic process, nonsense-mediated decay
73	108	2.41267	7.32232e-116	<0.001	GO:0019083	viral transcription
73	109	2.40057	2.19976e-115	<0.001	GO:0006612	protein targeting to membrane
82	130	2.3708	2.05632e-127	<0.001	GO:0006413	translational initiation
19	27	2.26025	4.04586e-30	<0.001	GO:0042788	polysomal ribosome
3	4	2.22315	1.06087e-05	0.03	GO:0098556	cytoplasmic side of rough endoplasmic reticulum membrane
74	134	2.19075	1.2032e-107	<0.001	GO:0044445	cytosolic part
57	104	2.11054	2.48343e-81	<0.001	GO:0003735	structural constituent of ribosome
73	151	2.06643	3.10666e-100	<0.001	GO:0044391	ribosomal subunit
73	156	2.03942	7.42438e-99	<0.001	GO:0006412	translation
75	166	2.02044	2.75285e-100	<0.001	GO:0090150	establishment of protein localization to membrane
77	173	2.0181	1.51141e-102	<0.001	GO:0000956	nuclear-transcribed mRNA catabolic process
7	12	2.00048	6.84307e-11	<0.001	GO:0042274	ribosomal small subunit biogenesis
73	170	1.97158	2.64997e-95	<0.001	GO:0043043	peptide biosynthetic process
4	7	1.9669	1.24548e-06	0.001	GO:0000027	ribosomal large subunit assembly
77	185	1.96675	1.15397e-99	<0.001	GO:0006402	mRNA catabolic process
29	56	1.95991	6.85431e-40	<0.001	GO:0015935	small ribosomal subunit
76	196	1.91028	2.572e-95	<0.001	GO:0006364	rRNA processing
44	96	1.90686	1.37559e-57	<0.001	GO:0015934	large ribosomal subunit
77	203	1.89942	8.87038e-96	<0.001	GO:0006401	RNA catabolic process
76	202	1.88895	4.36712e-94	<0.001	GO:0016072	rRNA metabolic process
77	208	1.88239	8.87178e-95	<0.001	GO:0006605	protein targeting
74	205	1.85093	9.27873e-90	<0.001	GO:0043604	amide biosynthetic process
73	217	1.79896	9.50201e-86	<0.001	GO:0006518	peptide metabolic process
5	11	1.78778	2.1648e-07	0.001	GO:0003746	translation elongation factor activity
36	89	1.78508	1.74584e-44	<0.001	GO:0005840	ribosome
78	249	1.776	2.3532e-89	<0.001	GO:0072594	establishment of protein localization to organelle
6	14	1.74645	1.86102e-08	<0.001	GO:0042273	ribosomal large subunit biogenesis
78	278	1.70706	4.94561e-85	<0.001	GO:0034655	nucleobase-containing compound catabolic process
4	10	1.69795	7.2302e-06	0.022	GO:0008097	5S rRNA binding
78	294	1.67311	7.09697e-83	<0.001	GO:0046700	heterocycle catabolic process
78	295	1.67107	9.57564e-83	<0.001	GO:0044270	cellular nitrogen compound catabolic process
78	299	1.663	3.13556e-82	<0.001	GO:0019439	aromatic compound catabolic process
74	277	1.65858	1.95558e-78	<0.001	GO:0072657	protein localization to membrane
12	33	1.64349	1.02143e-14	<0.001	GO:0019843	rRNA binding
78	312	1.63774	1.30425e-80	<0.001	GO:1901361	organic cyclic compound catabolic process
4	11	1.63576	1.12372e-05	0.03	GO:2000059	negative regulation of protein ubiquitination involved in ubiquitin-dependent protein catabolic process
77	310	1.62919	3.21526e-79	<0.001	GO:0034470	ncRNA processing
5	14	1.62286	9.06813e-07	0.001	GO:0005852	eukaryotic translation initiation factor 3 complex
14	40	1.62261	1.05284e-16	<0.001	GO:0022613	ribonucleoprotein complex biogenesis
75	311	1.60258	7.21012e-76	<0.001	GO:0043603	cellular amide metabolic process
79	383	1.53208	1.64735e-74	<0.001	GO:0033365	protein localization to organelle
79	436	1.46037	9.53062e-70	<0.001	GO:0034660	ncRNA metabolic process
81	456	1.45918	5.1205e-71	<0.001	GO:0006886	intracellular protein transport
6	22	1.45808	4.21505e-07	0.001	GO:0048027	mRNA 5'-UTR binding
90	577	1.4353	7.27156e-75	<0.001	GO:0030529	intracellular ribonucleoprotein complex
85	519	1.43515	6.76954e-72	<0.001	GO:0016071	mRNA metabolic process
90	580	1.43252	1.18318e-74	<0.001	GO:1990904	ribonucleoprotein complex
83	566	1.36604	8.30457e-66	<0.001	GO:0044265	cellular macromolecule catabolic process
59	350	1.33627	1.19249e-48	<0.001	GO:0005198	structural molecule activity
79	560	1.32628	8.33886e-61	<0.001	GO:1902580	single-organism cellular localization
75	525	1.31454	9.95207e-58	<0.001	GO:0044802	single-organism membrane organization
77	556	1.30728	2.0317e-58	<0.001	GO:1901566	organonitrogen compound biosynthetic process
6	29	1.30424	2.4745e-06	0.005	GO:1904666	regulation of ubiquitin protein ligase activity
79	590	1.29887	5.57349e-59	<0.001	GO:0034613	cellular protein localization
116	1338	1.29666	3.80797e-72	<0.001	GO:0003723	RNA binding
79	594	1.29533	9.58219e-59	<0.001	GO:0070727	cellular macromolecule localization
85	687	1.28666	2.9652e-61	<0.001	GO:0006396	RNA processing
85	688	1.2859	3.35901e-61	<0.001	GO:0016482	cytoplasmic transport
83	664	1.28208	6.15041e-60	<0.001	GO:0009057	macromolecule catabolic process
79	663	1.23809	6.00612e-55	<0.001	GO:0061024	membrane organization
9	52	1.20908	3.59254e-08	<0.001	GO:0008135	translation factor activity, RNA binding
47	337	1.19402	2.48102e-34	<0.001	GO:0005925	focal adhesion
47	338	1.19249	2.8527e-34	<0.001	GO:0005924	cell-substrate adherens junction
47	339	1.19096	3.27849e-34	<0.001	GO:0030055	cell-substrate junction
84	846	1.16768	1.95546e-52	<0.001	GO:0015031	protein transport
80	796	1.1549	6.58747e-50	<0.001	GO:0051641	cellular localization
85	910	1.1411	5.55276e-51	<0.001	GO:0045184	establishment of protein localization
84	898	1.13696	2.57959e-50	<0.001	GO:0044248	cellular catabolic process
48	404	1.11528	8.78266e-32	<0.001	GO:0005912	adherens junction
82	912	1.10707	1.57167e-47	<0.001	GO:1902582	single-organism intracellular transport
48	414	1.10289	2.76204e-31	<0.001	GO:0070161	anchoring junction
31	247	1.09155	3.78655e-21	<0.001	GO:0031012	extracellular matrix
85	1006	1.08948	2.05848e-47	<0.001	GO:1901564	organonitrogen compound metabolic process
88	1078	1.0866	3.38187e-48	<0.001	GO:0046907	intracellular transport
85	1037	1.07386	2.417e-46	<0.001	GO:1901575	organic substance catabolic process
15	117	1.06412	7.3619e-11	<0.001	GO:0044085	cellular component biogenesis
86	1105	1.05203	3.6169e-45	<0.001	GO:0009056	catabolic process
91	1263	1.0373	1.49444e-45	<0.001	GO:0071702	organic substance transport
86	1186	1.01553	1.10729e-42	<0.001	GO:0008104	protein localization
86	1198	1.01033	2.48737e-42	<0.001	GO:0033036	macromolecule localization
98	1594	0.992056	9.39516e-44	<0.001	GO:0051649	establishment of localization in cell
14	129	0.979955	3.02916e-09	<0.001	GO:0003729	mRNA binding
14	129	0.979955	3.02916e-09	<0.001	GO:0044822	poly(A) RNA binding
130	3409	0.963621	1.73082e-40	<0.001	GO:0032991	macromolecular complex
8	81	0.929111	1.66018e-05	0.036	GO:0045727	positive regulation of translation
11	122	0.886282	1.04759e-06	0.001	GO:0022618	ribonucleoprotein complex assembly
117	2916	0.878498	4.85859e-36	<0.001	GO:0003676	nucleic acid binding
21	246	0.87673	2.82402e-11	<0.001	GO:0006417	regulation of translation
10	117	0.860005	5.33632e-06	0.016	GO:0051340	regulation of ligase activity
10	117	0.860005	5.33632e-06	0.016	GO:0051438	regulation of ubiquitin-protein transferase activity
11	130	0.855889	1.97066e-06	0.003	GO:0071826	ribonucleoprotein complex subunit organization
98	2061	0.853786	7.15944e-34	<0.001	GO:0044765	single-organism transport
106	2450	0.847307	5.79969e-34	<0.001	GO:0006810	transport
107	2548	0.836478	3.20599e-33	<0.001	GO:0051234	establishment of localization
11	136	0.834388	3.07189e-06	0.01	GO:0035770	ribonucleoprotein granule
21	273	0.826593	1.99505e-10	<0.001	GO:0034248	regulation of cellular amide metabolic process
99	2218	0.824353	5.76707e-32	<0.001	GO:1902578	single-organism localization
26	350	0.820898	2.46776e-12	<0.001	GO:0010608	posttranscriptional regulation of gene expression
123	3754	0.800691	1.27902e-29	<0.001	GO:0005829	cytosol
50	802	0.800369	3.34054e-20	<0.001	GO:0030054	cell junction
108	2837	0.785733	1.04756e-29	<0.001	GO:0051179	localization
19	267	0.785347	5.65538e-09	<0.001	GO:0045296	cadherin binding
84	1804	0.774509	5.20412e-27	<0.001	GO:0065010	extracellular membrane-bounded organelle
84	1804	0.774509	5.20412e-27	<0.001	GO:0070062	extracellular exosome
84	1811	0.772441	6.86331e-27	<0.001	GO:0043230	extracellular organelle
84	1811	0.772441	6.86331e-27	<0.001	GO:1903561	extracellular vesicle
124	4230	0.734608	5.48042e-25	<0.001	GO:1901363	heterocyclic compound binding
144	6493	0.734556	4.97383e-19	<0.001	GO:0044444	cytoplasmic part
91	2243	0.731102	2.46415e-25	<0.001	GO:0034645	cellular macromolecule biosynthetic process
124	4257	0.730218	1.05395e-24	<0.001	GO:0097159	organic cyclic compound binding
86	2049	0.727261	1.45173e-24	<0.001	GO:0031988	membrane-bounded vesicle
38	668	0.721589	5.50914e-14	<0.001	GO:0005730	nucleolus
88	2156	0.720788	2.00485e-24	<0.001	GO:0044421	extracellular region part
92	2388	0.706901	5.3093e-24	<0.001	GO:0044267	cellular protein metabolic process
85	2105	0.701875	5.05776e-23	<0.001	GO:0032774	RNA biosynthetic process
86	2174	0.694854	9.56216e-23	<0.001	GO:0031982	vesicle
96	2643	0.692475	1.97552e-23	<0.001	GO:0016070	RNA metabolic process
93	2497	0.692472	3.06359e-23	<0.001	GO:0009059	macromolecule biosynthetic process
19	340	0.670719	2.68454e-07	0.001	GO:0050839	cell adhesion molecule binding
13	229	0.669409	1.9244e-05	0.041	GO:0031396	regulation of protein ubiquitination
95	2738	0.661197	1.42492e-21	<0.001	GO:0019538	protein metabolic process
86	2314	0.660314	7.22442e-21	<0.001	GO:0034654	nucleobase-containing compound biosynthetic process
89	2488	0.651607	1.17779e-20	<0.001	GO:0044271	cellular nitrogen compound biosynthetic process
86	2355	0.650515	2.39871e-20	<0.001	GO:0019438	aromatic compound biosynthetic process
86	2362	0.648856	2.93556e-20	<0.001	GO:0018130	heterocycle biosynthetic process
100	3098	0.642782	1.04464e-20	<0.001	GO:0044249	cellular biosynthetic process
154	8804	0.641337	5.17621e-10	<0.001	GO:0009987	cellular process
101	3182	0.637649	1.96058e-20	<0.001	GO:1901576	organic substance biosynthetic process
86	2432	0.63247	2.11571e-19	<0.001	GO:1901362	organic cyclic compound biosynthetic process
98	3043	0.631561	4.96948e-20	<0.001	GO:0090304	nucleic acid metabolic process
103	3341	0.630039	5.08619e-20	<0.001	GO:0006139	nucleobase-containing compound metabolic process
101	3226	0.629273	5.79802e-20	<0.001	GO:0009058	biosynthetic process
75	2015	0.618707	1.33689e-17	<0.001	GO:0043228	non-membrane-bounded organelle
75	2015	0.618707	1.33689e-17	<0.001	GO:0043232	intracellular non-membrane-bounded organelle
107	3661	0.61783	2.71239e-19	<0.001	GO:0034641	cellular nitrogen compound metabolic process
103	3438	0.612224	4.99013e-19	<0.001	GO:0006725	cellular aromatic compound metabolic process
103	3445	0.61095	5.86258e-19	<0.001	GO:0046483	heterocycle metabolic process
156	9374	0.605996	5.69665e-08	<0.001	GO:0044424	intracellular part
137	6436	0.602813	9.27602e-15	<0.001	GO:0044446	intracellular organelle part
104	3566	0.600432	2.22283e-18	<0.001	GO:1901360	organic cyclic compound metabolic process
137	6539	0.58743	4.84997e-14	<0.001	GO:0044422	organelle part
108	3912	0.58618	1.553e-17	<0.001	GO:0006807	nitrogen compound metabolic process
99	3405	0.573869	5.80539e-17	<0.001	GO:0016043	cellular component organization
99	3425	0.570216	8.94497e-17	<0.001	GO:0071840	cellular component organization or biogenesis
131	6067	0.556982	7.87675e-14	<0.001	GO:0044237	cellular metabolic process
135	6518	0.555419	4.99658e-13	<0.001	GO:0008152	metabolic process
117	4900	0.536514	1.66629e-14	<0.001	GO:0044260	cellular macromolecule metabolic process
154	9341	0.531512	5.4805e-07	0.001	GO:0005488	binding
130	6235	0.516521	3.63135e-12	<0.001	GO:0071704	organic substance metabolic process
119	5226	0.512503	3.32248e-13	<0.001	GO:0043170	macromolecule metabolic process
109	4476	0.505653	1.84085e-13	<0.001	GO:0016020	membrane
124	5999	0.464111	1.16627e-10	<0.001	GO:0044238	primary metabolic process
136	7250	0.461493	4.02616e-09	<0.001	GO:0043226	organelle
138	7633	0.437065	5.23285e-08	<0.001	GO:0005515	protein binding
124	6251	0.426715	3.336e-09	<0.001	GO:0044763	single-organism cellular process
133	7205	0.417615	5.14641e-08	<0.001	GO:0044699	single-organism process
125	6494	0.404479	2.53653e-08	<0.001	GO:0043227	membrane-bounded organelle
123	6496	0.376463	1.63184e-07	0.001	GO:0043229	intracellular organelle
80	3510	0.351689	2.74675e-07	0.001	GO:0044428	nuclear part

## Sheet: Supplementary file_8
Feature	Location	Kruskal_Wallis_chi_squared	KW_df	KW_p-value	Geneset_comparison	Dunn's_Z	P.unadj	P.adj_BH	Significant
Min_free_energy	5' UTR terminal 60 nts	8.9543	2	0.0114	High_TE:Low_TE	-0.274391	0.783784	0.783784	FALSE
.	.	NA	NA	NA	High_TE:Non_DE	2.81538	0.00487201	0.014616	TRUE
.	.	NA	NA	NA	Low_TE:Non_DE	1.02422	0.305733	0.458599	FALSE
Min_free_energy	TIS/Kozak (-30 to +30)	11.73	2	0.00284	High_TE:Low_TE	-0.227845	0.819767	0.819767	FALSE
.	.	NA	NA	NA	High_TE:Non_DE	2.68923	0.00716161	0.0214848	TRUE
.	.	NA	NA	NA	Low_TE:Non_DE	0.942947	0.345708	0.518562	FALSE
log10 length	5' UTR	7.1695	2	0.02774	High_TE:Low_TE	-2.49097	0.0127396	0.0382189	TRUE
.	.	NA	NA	NA	High_TE:Non_DE	-1.57455	0.115359	0.115359	FALSE
.	.	NA	NA	NA	Low_TE:Non_DE	2.15993	0.0307779	0.0461668	TRUE
log10 length	CDS	66.936	2	2.92e-15	High_TE:Low_TE	-0.182765	0.855	0.855	FALSE
.	.	NA	NA	NA	High_TE:Non_DE	-7.9701	1.59e-15	4.76e-15	TRUE
.	.	NA	NA	NA	Low_TE:Non_DE	-1.87656	0.0606	0.0909	FALSE
log10 length	3' UTR	73.952	2	2.2e-16	High_TE:Low_TE	-3.66413	0.000248	0.000372	TRUE
.	.	NA	NA	NA	High_TE:Non_DE	-8.44475	3.05e-17	9.14e-17	TRUE
.	.	NA	NA	NA	Low_TE:Non_DE	1.59362	0.111	0.111	FALSE
GC content	5' UTR	21.691	2	1.95e-05	High_TE:Low_TE	0.329234	0.742	0.742	FALSE
.	.	NA	NA	NA	High_TE:Non_DE	-4.41522	1.01e-05	3.03e-05	TRUE
.	.	NA	NA	NA	Low_TE:Non_DE	-1.49811	0.134	0.201	FALSE
GC content	CDS	7.4953	2	0.02357	High_TE:Low_TE	2.35789	0.0184	0.0551	FALSE
.	.	NA	NA	NA	High_TE:Non_DE	1.93167	0.0534	0.0534	FALSE
.	.	NA	NA	NA	Low_TE:Non_DE	-1.93309	0.0532	0.0798	FALSE
GC content	3' UTR	4.0915	2	0.1293	High_TE:Low_TE	1.73394	0.0829	0.124	FALSE
.	.	NA	NA	NA	High_TE:Non_DE	-0.579976	0.562	0.562	FALSE
.	.	NA	NA	NA	Low_TE:Non_DE	-1.93991	0.0524	0.157	FALSE
TC content	5' UTR	50.271	2	1.21e-11	High_TE:Low_TE	1.89109	0.0586	0.0879	FALSE
.	.	NA	NA	NA	High_TE:Non_DE	7.08917	1.35e-12	4.05e-12	TRUE
.	.	NA	NA	NA	Low_TE:Non_DE	-0.093924	0.925	0.925	FALSE
TC content	CDS	19.905	2	4.76e-05	High_TE:Low_TE	-0.903176	0.366433	0.55	FALSE
.	.	NA	NA	NA	High_TE:Non_DE	-4.39142	1.13e-05	3.38e-05	TRUE
.	.	NA	NA	NA	Low_TE:Non_DE	-0.232623	0.816054	0.816	FALSE
TC content	3' UTR	5.2646	2	0.07191	High_TE:Low_TE	1.23162	0.218	0.218	FALSE
.	.	NA	NA	NA	High_TE:Non_DE	-1.57076	0.116	0.174	FALSE
.	.	NA	NA	NA	Low_TE:Non_DE	-1.67819	0.0933	0.28	FALSE

## Sheet: Supplementary file_9
Feature	Location	Matched_on	Welch_t_statistic	df	t_p-value	Mean_NonDE	Mean_High_TE	95CI_lower	95CI_upper	Wilcoxon_W	W_p-value	W_difference	W_95CI_min	W_95CI_max
TC content	5' UTR	CDS, 3' UTR TC content; 5' UTR, CDS, 3' UTR GC content and lengths; TIS MFE	-5.932	317.75	7.81e-09	0.482284	0.536708	-0.0724743	-0.0363732	8191	2.56e-08	-0.0482531	-0.0659285	-0.0310733
log10 length	CDS	5', 3' UTR lengths; 5' UTR, CDS, 3' UTR GC content; 5' UTR TC content; TIS MFE	6.3816	316.21	6.23e-10	3.17797	2.94336	0.162281	0.306947	17946	5.06e-10	0.255208	0.175438	0.331327
log10 length	3' UTR	5' UTR, CDS lengths; 5' UTR, CDS, 3' UTR GC content; 5' UTR TC content; TIS MFE	5.521	289.7	7.49e-08	2.91924	2.54352	0.241775	0.509652	16896	7.46e-07	0.402514	0.24369	0.558415
Min free energy	8	5' UTR, CDS, 3' UTR lengths and GC content; 5' UTR TC content	-2.6396	302.17	0.008732	-18.1544	-16.4838	-2.91611	-0.425142	10642	0.009143	-1.70008	-3.00002	-0.400057

## Sheet: Supplementary file_10
Region	RBP_name	Annotation	Num_sites
UTR5	B52	High TE	14
UTR5	B52	Non DE 1	12
UTR5	B52	Non DE 2	13
UTR5	B52	Non DE 3	16
UTR5	B52	Non DE 4	24
UTR5	B52	Non DE 5	24
UTR5	B52	Non DE 6	16
UTR5	BRUNOL6	High TE	15
UTR5	BRUNOL6	Non DE 1	18
UTR5	BRUNOL6	Non DE 2	16
UTR5	BRUNOL6	Non DE 3	13
UTR5	BRUNOL6	Non DE 4	14
UTR5	BRUNOL6	Non DE 5	15
UTR5	BRUNOL6	Non DE 6	14
UTR5	CNOT4 (3)	High TE	10
UTR5	CNOT4 (3)	Non DE 1	8
UTR5	CNOT4 (3)	Non DE 2	7
UTR5	CNOT4 (3)	Non DE 3	21
UTR5	CNOT4 (3)	Non DE 4	8
UTR5	CNOT4 (3)	Non DE 5	7
UTR5	CNOT4 (3)	Non DE 6	6
UTR5	CPEB1	High TE	7
UTR5	CPEB1	Non DE 1	7
UTR5	CPEB1	Non DE 2	6
UTR5	CPEB1	Non DE 3	8
UTR5	CPEB1	Non DE 4	11
UTR5	CPEB1	Non DE 5	14
UTR5	CPEB1	Non DE 6	4
UTR5	CPEB2	High TE	12
UTR5	CPEB2	Non DE 1	20
UTR5	CPEB2	Non DE 2	8
UTR5	CPEB2	Non DE 3	13
UTR5	CPEB2	Non DE 4	3
UTR5	CPEB2	Non DE 5	8
UTR5	CPEB2	Non DE 6	7
UTR5	CPEB4	High TE	12
UTR5	CPEB4	Non DE 1	20
UTR5	CPEB4	Non DE 2	8
UTR5	CPEB4	Non DE 3	13
UTR5	CPEB4	Non DE 4	3
UTR5	CPEB4	Non DE 5	8
UTR5	CPEB4	Non DE 6	7
UTR5	EIF4B (2)	High TE	11
UTR5	EIF4B (2)	Non DE 1	10
UTR5	EIF4B (2)	Non DE 2	4
UTR5	EIF4B (2)	Non DE 3	11
UTR5	EIF4B (2)	Non DE 4	11
UTR5	EIF4B (2)	Non DE 5	5
UTR5	EIF4B (2)	Non DE 6	6
UTR5	EIF4G2 (4)	High TE	14
UTR5	EIF4G2 (4)	Non DE 1	15
UTR5	EIF4G2 (4)	Non DE 2	25
UTR5	EIF4G2 (4)	Non DE 3	25
UTR5	EIF4G2 (4)	Non DE 4	23
UTR5	EIF4G2 (4)	Non DE 5	20
UTR5	EIF4G2 (4)	Non DE 6	29
UTR5	ELAVL1 (2)	High TE	5
UTR5	ELAVL1 (2)	Non DE 1	9
UTR5	ELAVL1 (2)	Non DE 2	15
UTR5	ELAVL1 (2)	Non DE 3	9
UTR5	ELAVL1 (2)	Non DE 4	11
UTR5	ELAVL1 (2)	Non DE 5	8
UTR5	ELAVL1 (2)	Non DE 6	10
UTR5	ELAVL1 (3)	High TE	5
UTR5	ELAVL1 (3)	Non DE 1	9
UTR5	ELAVL1 (3)	Non DE 2	15
UTR5	ELAVL1 (3)	Non DE 3	9
UTR5	ELAVL1 (3)	Non DE 4	11
UTR5	ELAVL1 (3)	Non DE 5	8
UTR5	ELAVL1 (3)	Non DE 6	10
UTR5	ELAVL1 (5)	High TE	33
UTR5	ELAVL1 (5)	Non DE 1	54
UTR5	ELAVL1 (5)	Non DE 2	45
UTR5	ELAVL1 (5)	Non DE 3	78
UTR5	ELAVL1 (5)	Non DE 4	33
UTR5	ELAVL1 (5)	Non DE 5	32
UTR5	ELAVL1 (5)	Non DE 6	19
UTR5	ELAVL4 (1)	High TE	7
UTR5	ELAVL4 (1)	Non DE 1	7
UTR5	ELAVL4 (1)	Non DE 2	7
UTR5	ELAVL4 (1)	Non DE 3	6
UTR5	ELAVL4 (1)	Non DE 4	11
UTR5	ELAVL4 (1)	Non DE 5	15
UTR5	ELAVL4 (1)	Non DE 6	7
UTR5	ENSDARG00000058818	High TE	8
UTR5	ENSDARG00000058818	Non DE 1	26
UTR5	ENSDARG00000058818	Non DE 2	3
UTR5	ENSDARG00000058818	Non DE 3	7
UTR5	ENSDARG00000058818	Non DE 4	4
UTR5	ENSDARG00000058818	Non DE 5	6
UTR5	ENSDARG00000058818	Non DE 6	3
UTR5	ESRP1 (1)	High TE	12
UTR5	ESRP1 (1)	Non DE 1	11
UTR5	ESRP1 (1)	Non DE 2	6
UTR5	ESRP1 (1)	Non DE 3	8
UTR5	ESRP1 (1)	Non DE 4	10
UTR5	ESRP1 (1)	Non DE 5	24
UTR5	ESRP1 (1)	Non DE 6	6
UTR5	ESRP1 (3)	High TE	10
UTR5	ESRP1 (3)	Non DE 1	6
UTR5	ESRP1 (3)	Non DE 2	8
UTR5	ESRP1 (3)	Non DE 3	5
UTR5	ESRP1 (3)	Non DE 4	9
UTR5	ESRP1 (3)	Non DE 5	12
UTR5	ESRP1 (3)	Non DE 6	4
UTR5	EWSR1 (1)	High TE	32
UTR5	EWSR1 (1)	Non DE 1	33
UTR5	EWSR1 (1)	Non DE 2	27
UTR5	EWSR1 (1)	Non DE 3	35
UTR5	EWSR1 (1)	Non DE 4	38
UTR5	EWSR1 (1)	Non DE 5	51
UTR5	EWSR1 (1)	Non DE 6	30
UTR5	EWSR1 (3)	High TE	14
UTR5	EWSR1 (3)	Non DE 1	12
UTR5	EWSR1 (3)	Non DE 2	10
UTR5	EWSR1 (3)	Non DE 3	13
UTR5	EWSR1 (3)	Non DE 4	11
UTR5	EWSR1 (3)	Non DE 5	25
UTR5	EWSR1 (3)	Non DE 6	14
UTR5	EWSR1 (4)	High TE	10
UTR5	EWSR1 (4)	Non DE 1	16
UTR5	EWSR1 (4)	Non DE 2	7
UTR5	EWSR1 (4)	Non DE 3	7
UTR5	EWSR1 (4)	Non DE 4	5
UTR5	EWSR1 (4)	Non DE 5	15
UTR5	EWSR1 (4)	Non DE 6	9
UTR5	FUBP1 (1)	High TE	7
UTR5	FUBP1 (1)	Non DE 1	7
UTR5	FUBP1 (1)	Non DE 2	7
UTR5	FUBP1 (1)	Non DE 3	6
UTR5	FUBP1 (1)	Non DE 4	11
UTR5	FUBP1 (1)	Non DE 5	15
UTR5	FUBP1 (1)	Non DE 6	7
UTR5	FUS (1)	High TE	10
UTR5	FUS (1)	Non DE 1	17
UTR5	FUS (1)	Non DE 2	10
UTR5	FUS (1)	Non DE 3	7
UTR5	FUS (1)	Non DE 4	7
UTR5	FUS (1)	Non DE 5	12
UTR5	FUS (1)	Non DE 6	10
UTR5	HNRNPA2B1 (1)	High TE	16
UTR5	HNRNPA2B1 (1)	Non DE 1	15
UTR5	HNRNPA2B1 (1)	Non DE 2	18
UTR5	HNRNPA2B1 (1)	Non DE 3	16
UTR5	HNRNPA2B1 (1)	Non DE 4	25
UTR5	HNRNPA2B1 (1)	Non DE 5	24
UTR5	HNRNPA2B1 (1)	Non DE 6	12
UTR5	HNRNPC (1)	High TE	33
UTR5	HNRNPC (1)	Non DE 1	54
UTR5	HNRNPC (1)	Non DE 2	45
UTR5	HNRNPC (1)	Non DE 3	78
UTR5	HNRNPC (1)	Non DE 4	33
UTR5	HNRNPC (1)	Non DE 5	32
UTR5	HNRNPC (1)	Non DE 6	19
UTR5	HNRNPCL1 (1)	High TE	33
UTR5	HNRNPCL1 (1)	Non DE 1	54
UTR5	HNRNPCL1 (1)	Non DE 2	45
UTR5	HNRNPCL1 (1)	Non DE 3	78
UTR5	HNRNPCL1 (1)	Non DE 4	33
UTR5	HNRNPCL1 (1)	Non DE 5	32
UTR5	HNRNPCL1 (1)	Non DE 6	19
UTR5	HNRNPF (1)	High TE	16
UTR5	HNRNPF (1)	Non DE 1	21
UTR5	HNRNPF (1)	Non DE 2	16
UTR5	HNRNPF (1)	Non DE 3	21
UTR5	HNRNPF (1)	Non DE 4	25
UTR5	HNRNPF (1)	Non DE 5	31
UTR5	HNRNPF (1)	Non DE 6	16
UTR5	HNRNPF (2)	High TE	8
UTR5	HNRNPF (2)	Non DE 1	12
UTR5	HNRNPF (2)	Non DE 2	7
UTR5	HNRNPF (2)	Non DE 3	12
UTR5	HNRNPF (2)	Non DE 4	19
UTR5	HNRNPF (2)	Non DE 5	11
UTR5	HNRNPF (2)	Non DE 6	17
UTR5	HNRNPH2 (1)	High TE	23
UTR5	HNRNPH2 (1)	Non DE 1	17
UTR5	HNRNPH2 (1)	Non DE 2	17
UTR5	HNRNPH2 (1)	Non DE 3	20
UTR5	HNRNPH2 (1)	Non DE 4	19
UTR5	HNRNPH2 (1)	Non DE 5	27
UTR5	HNRNPH2 (1)	Non DE 6	22
UTR5	HNRNPH2 (2)	High TE	8
UTR5	HNRNPH2 (2)	Non DE 1	6
UTR5	HNRNPH2 (2)	Non DE 2	6
UTR5	HNRNPH2 (2)	Non DE 3	6
UTR5	HNRNPH2 (2)	Non DE 4	8
UTR5	HNRNPH2 (2)	Non DE 5	14
UTR5	HNRNPH2 (2)	Non DE 6	11
UTR5	HNRNPH2 (3)	High TE	16
UTR5	HNRNPH2 (3)	Non DE 1	21
UTR5	HNRNPH2 (3)	Non DE 2	16
UTR5	HNRNPH2 (3)	Non DE 3	21
UTR5	HNRNPH2 (3)	Non DE 4	25
UTR5	HNRNPH2 (3)	Non DE 5	31
UTR5	HNRNPH2 (3)	Non DE 6	16
UTR5	HNRNPK (4)	High TE	20
UTR5	HNRNPK (4)	Non DE 1	7
UTR5	HNRNPK (4)	Non DE 2	9
UTR5	HNRNPK (4)	Non DE 3	12
UTR5	HNRNPK (4)	Non DE 4	15
UTR5	HNRNPK (4)	Non DE 5	13
UTR5	HNRNPK (4)	Non DE 6	11
UTR5	IGF2BP2 (3)	High TE	10
UTR5	IGF2BP2 (3)	Non DE 1	4
UTR5	IGF2BP2 (3)	Non DE 2	13
UTR5	IGF2BP2 (3)	Non DE 3	3
UTR5	IGF2BP2 (3)	Non DE 4	8
UTR5	IGF2BP2 (3)	Non DE 5	8
UTR5	IGF2BP2 (3)	Non DE 6	8
UTR5	ILF2 (1)	High TE	32
UTR5	ILF2 (1)	Non DE 1	33
UTR5	ILF2 (1)	Non DE 2	27
UTR5	ILF2 (1)	Non DE 3	35
UTR5	ILF2 (1)	Non DE 4	38
UTR5	ILF2 (1)	Non DE 5	51
UTR5	ILF2 (1)	Non DE 6	30
UTR5	KHDRBS3 (3)	High TE	9
UTR5	KHDRBS3 (3)	Non DE 1	17
UTR5	KHDRBS3 (3)	Non DE 2	18
UTR5	KHDRBS3 (3)	Non DE 3	10
UTR5	KHDRBS3 (3)	Non DE 4	16
UTR5	KHDRBS3 (3)	Non DE 5	16
UTR5	KHDRBS3 (3)	Non DE 6	19
UTR5	LIN28A (2)	High TE	4
UTR5	LIN28A (2)	Non DE 1	8
UTR5	LIN28A (2)	Non DE 2	16
UTR5	LIN28A (2)	Non DE 3	6
UTR5	LIN28A (2)	Non DE 4	9
UTR5	LIN28A (2)	Non DE 5	12
UTR5	LIN28A (2)	Non DE 6	8
UTR5	MBNL1 (2)	High TE	9
UTR5	MBNL1 (2)	Non DE 1	8
UTR5	MBNL1 (2)	Non DE 2	9
UTR5	MBNL1 (2)	Non DE 3	13
UTR5	MBNL1 (2)	Non DE 4	3
UTR5	MBNL1 (2)	Non DE 5	3
UTR5	MBNL1 (2)	Non DE 6	5
UTR5	NCU02404	High TE	5
UTR5	NCU02404	Non DE 1	17
UTR5	NCU02404	Non DE 2	16
UTR5	NCU02404	Non DE 3	12
UTR5	NCU02404	Non DE 4	11
UTR5	NCU02404	Non DE 5	9
UTR5	NCU02404	Non DE 6	10
UTR5	NUPL2 (7)	High TE	3
UTR5	NUPL2 (7)	Non DE 1	6
UTR5	NUPL2 (7)	Non DE 2	7
UTR5	NUPL2 (7)	Non DE 3	8
UTR5	NUPL2 (7)	Non DE 4	18
UTR5	NUPL2 (7)	Non DE 5	13
UTR5	NUPL2 (7)	Non DE 6	6
UTR5	PABPC1 (1)	High TE	4
UTR5	PABPC1 (1)	Non DE 1	20
UTR5	PABPC1 (1)	Non DE 2	9
UTR5	PABPC1 (1)	Non DE 3	7
UTR5	PABPC1 (1)	Non DE 4	4
UTR5	PABPC1 (1)	Non DE 5	9
UTR5	PABPC1 (1)	Non DE 6	8
UTR5	PABPC4	High TE	28
UTR5	PABPC4	Non DE 1	75
UTR5	PABPC4	Non DE 2	19
UTR5	PABPC4	Non DE 3	4
UTR5	PABPC4	Non DE 4	13
UTR5	PABPC4	Non DE 5	47
UTR5	PABPC4	Non DE 6	23
UTR5	PCBP1 (1)	High TE	30
UTR5	PCBP1 (1)	Non DE 1	21
UTR5	PCBP1 (1)	Non DE 2	23
UTR5	PCBP1 (1)	Non DE 3	35
UTR5	PCBP1 (1)	Non DE 4	39
UTR5	PCBP1 (1)	Non DE 5	24
UTR5	PCBP1 (1)	Non DE 6	30
UTR5	PCBP1 (3)	High TE	11
UTR5	PCBP1 (3)	Non DE 1	10
UTR5	PCBP1 (3)	Non DE 2	10
UTR5	PCBP1 (3)	Non DE 3	7
UTR5	PCBP1 (3)	Non DE 4	19
UTR5	PCBP1 (3)	Non DE 5	11
UTR5	PCBP1 (3)	Non DE 6	6
UTR5	PCBP1 (5)	High TE	19
UTR5	PCBP1 (5)	Non DE 1	14
UTR5	PCBP1 (5)	Non DE 2	10
UTR5	PCBP1 (5)	Non DE 3	12
UTR5	PCBP1 (5)	Non DE 4	11
UTR5	PCBP1 (5)	Non DE 5	9
UTR5	PCBP1 (5)	Non DE 6	10
UTR5	PCBP2 (1)	High TE	54
UTR5	PCBP2 (1)	Non DE 1	38
UTR5	PCBP2 (1)	Non DE 2	42
UTR5	PCBP2 (1)	Non DE 3	57
UTR5	PCBP2 (1)	Non DE 4	57
UTR5	PCBP2 (1)	Non DE 5	49
UTR5	PCBP2 (1)	Non DE 6	53
UTR5	PCBP2 (2)	High TE	11
UTR5	PCBP2 (2)	Non DE 1	16
UTR5	PCBP2 (2)	Non DE 2	12
UTR5	PCBP2 (2)	Non DE 3	8
UTR5	PCBP2 (2)	Non DE 4	20
UTR5	PCBP2 (2)	Non DE 5	13
UTR5	PCBP2 (2)	Non DE 6	5
UTR5	PCBP2 (6)	High TE	11
UTR5	PCBP2 (6)	Non DE 1	16
UTR5	PCBP2 (6)	Non DE 2	12
UTR5	PCBP2 (6)	Non DE 3	8
UTR5	PCBP2 (6)	Non DE 4	20
UTR5	PCBP2 (6)	Non DE 5	13
UTR5	PCBP2 (6)	Non DE 6	5
UTR5	PCBP2 (7)	High TE	13
UTR5	PCBP2 (7)	Non DE 1	7
UTR5	PCBP2 (7)	Non DE 2	8
UTR5	PCBP2 (7)	Non DE 3	5
UTR5	PCBP2 (7)	Non DE 4	9
UTR5	PCBP2 (7)	Non DE 5	14
UTR5	PCBP2 (7)	Non DE 6	5
UTR5	PCBP4 (1)	High TE	11
UTR5	PCBP4 (1)	Non DE 1	16
UTR5	PCBP4 (1)	Non DE 2	12
UTR5	PCBP4 (1)	Non DE 3	8
UTR5	PCBP4 (1)	Non DE 4	20
UTR5	PCBP4 (1)	Non DE 5	13
UTR5	PCBP4 (1)	Non DE 6	5
UTR5	PPRC1	High TE	9
UTR5	PPRC1	Non DE 1	17
UTR5	PPRC1	Non DE 2	18
UTR5	PPRC1	Non DE 3	10
UTR5	PPRC1	Non DE 4	16
UTR5	PPRC1	Non DE 5	16
UTR5	PPRC1	Non DE 6	19
UTR5	PUF60 (1)	High TE	33
UTR5	PUF60 (1)	Non DE 1	54
UTR5	PUF60 (1)	Non DE 2	45
UTR5	PUF60 (1)	Non DE 3	78
UTR5	PUF60 (1)	Non DE 4	33
UTR5	PUF60 (1)	Non DE 5	32
UTR5	PUF60 (1)	Non DE 6	19
UTR5	PUF60 (2)	High TE	11
UTR5	PUF60 (2)	Non DE 1	6
UTR5	PUF60 (2)	Non DE 2	6
UTR5	PUF60 (2)	Non DE 3	4
UTR5	PUF60 (2)	Non DE 4	5
UTR5	PUF60 (2)	Non DE 5	12
UTR5	PUF60 (2)	Non DE 6	4
UTR5	PUM1 (2)	High TE	16
UTR5	PUM1 (2)	Non DE 1	12
UTR5	PUM1 (2)	Non DE 2	11
UTR5	PUM1 (2)	Non DE 3	14
UTR5	PUM1 (2)	Non DE 4	13
UTR5	PUM1 (2)	Non DE 5	20
UTR5	PUM1 (2)	Non DE 6	14
UTR5	RALYL (1)	High TE	10
UTR5	RALYL (1)	Non DE 1	21
UTR5	RALYL (1)	Non DE 2	8
UTR5	RALYL (1)	Non DE 3	10
UTR5	RALYL (1)	Non DE 4	6
UTR5	RALYL (1)	Non DE 5	8
UTR5	RALYL (1)	Non DE 6	9
UTR5	RBM15B (1)	High TE	7
UTR5	RBM15B (1)	Non DE 1	7
UTR5	RBM15B (1)	Non DE 2	7
UTR5	RBM15B (1)	Non DE 3	6
UTR5	RBM15B (1)	Non DE 4	11
UTR5	RBM15B (1)	Non DE 5	15
UTR5	RBM15B (1)	Non DE 6	7
UTR5	RBM23 (1)	High TE	20
UTR5	RBM23 (1)	Non DE 1	14
UTR5	RBM23 (1)	Non DE 2	13
UTR5	RBM23 (1)	Non DE 3	17
UTR5	RBM23 (1)	Non DE 4	22
UTR5	RBM23 (1)	Non DE 5	35
UTR5	RBM23 (1)	Non DE 6	20
UTR5	RBM24 (2)	High TE	8
UTR5	RBM24 (2)	Non DE 1	26
UTR5	RBM24 (2)	Non DE 2	3
UTR5	RBM24 (2)	Non DE 3	7
UTR5	RBM24 (2)	Non DE 4	4
UTR5	RBM24 (2)	Non DE 5	6
UTR5	RBM24 (2)	Non DE 6	3
UTR5	RBM25 (1)	High TE	28
UTR5	RBM25 (1)	Non DE 1	26
UTR5	RBM25 (1)	Non DE 2	24
UTR5	RBM25 (1)	Non DE 3	24
UTR5	RBM25 (1)	Non DE 4	35
UTR5	RBM25 (1)	Non DE 5	48
UTR5	RBM25 (1)	Non DE 6	18
UTR5	RBM25 (3)	High TE	10
UTR5	RBM25 (3)	Non DE 1	16
UTR5	RBM25 (3)	Non DE 2	20
UTR5	RBM25 (3)	Non DE 3	19
UTR5	RBM25 (3)	Non DE 4	14
UTR5	RBM25 (3)	Non DE 5	12
UTR5	RBM25 (3)	Non DE 6	17
UTR5	RBM4 (4)	High TE	17
UTR5	RBM4 (4)	Non DE 1	17
UTR5	RBM4 (4)	Non DE 2	16
UTR5	RBM4 (4)	Non DE 3	19
UTR5	RBM4 (4)	Non DE 4	28
UTR5	RBM4 (4)	Non DE 5	19
UTR5	RBM4 (4)	Non DE 6	17
UTR5	RBM4 (5)	High TE	17
UTR5	RBM4 (5)	Non DE 1	17
UTR5	RBM4 (5)	Non DE 2	16
UTR5	RBM4 (5)	Non DE 3	19
UTR5	RBM4 (5)	Non DE 4	28
UTR5	RBM4 (5)	Non DE 5	19
UTR5	RBM4 (5)	Non DE 6	17
UTR5	RBM4B (1)	High TE	9
UTR5	RBM4B (1)	Non DE 1	17
UTR5	RBM4B (1)	Non DE 2	18
UTR5	RBM4B (1)	Non DE 3	10
UTR5	RBM4B (1)	Non DE 4	16
UTR5	RBM4B (1)	Non DE 5	16
UTR5	RBM4B (1)	Non DE 6	19
UTR5	RBM4B (2)	High TE	6
UTR5	RBM4B (2)	Non DE 1	5
UTR5	RBM4B (2)	Non DE 2	8
UTR5	RBM4B (2)	Non DE 3	8
UTR5	RBM4B (2)	Non DE 4	14
UTR5	RBM4B (2)	Non DE 5	2
UTR5	RBM4B (2)	Non DE 6	2
UTR5	RBM4B (3)	High TE	12
UTR5	RBM4B (3)	Non DE 1	7
UTR5	RBM4B (3)	Non DE 2	12
UTR5	RBM4B (3)	Non DE 3	18
UTR5	RBM4B (3)	Non DE 4	14
UTR5	RBM4B (3)	Non DE 5	15
UTR5	RBM4B (3)	Non DE 6	7
UTR5	RBM6 (4)	High TE	11
UTR5	RBM6 (4)	Non DE 1	8
UTR5	RBM6 (4)	Non DE 2	3
UTR5	RBM6 (4)	Non DE 3	5
UTR5	RBM6 (4)	Non DE 4	7
UTR5	RBM6 (4)	Non DE 5	10
UTR5	RBM6 (4)	Non DE 6	11
UTR5	RBM8A	High TE	9
UTR5	RBM8A	Non DE 1	17
UTR5	RBM8A	Non DE 2	18
UTR5	RBM8A	Non DE 3	10
UTR5	RBM8A	Non DE 4	16
UTR5	RBM8A	Non DE 5	16
UTR5	RBM8A	Non DE 6	19
UTR5	RC3H1 (3)	High TE	6
UTR5	RC3H1 (3)	Non DE 1	9
UTR5	RC3H1 (3)	Non DE 2	6
UTR5	RC3H1 (3)	Non DE 3	9
UTR5	RC3H1 (3)	Non DE 4	15
UTR5	RC3H1 (3)	Non DE 5	6
UTR5	RC3H1 (3)	Non DE 6	11
UTR5	SAMD4A	High TE	16
UTR5	SAMD4A	Non DE 1	14
UTR5	SAMD4A	Non DE 2	14
UTR5	SAMD4A	Non DE 3	13
UTR5	SAMD4A	Non DE 4	10
UTR5	SAMD4A	Non DE 5	16
UTR5	SAMD4A	Non DE 6	9
UTR5	SART3	High TE	4
UTR5	SART3	Non DE 1	20
UTR5	SART3	Non DE 2	9
UTR5	SART3	Non DE 3	7
UTR5	SART3	Non DE 4	4
UTR5	SART3	Non DE 5	9
UTR5	SART3	Non DE 6	8
UTR5	SF2	High TE	8
UTR5	SF2	Non DE 1	24
UTR5	SF2	Non DE 2	13
UTR5	SF2	Non DE 3	12
UTR5	SF2	Non DE 4	16
UTR5	SF2	Non DE 5	15
UTR5	SF2	Non DE 6	15
UTR5	SFPQ (4)	High TE	14
UTR5	SFPQ (4)	Non DE 1	22
UTR5	SFPQ (4)	Non DE 2	16
UTR5	SFPQ (4)	Non DE 3	23
UTR5	SFPQ (4)	Non DE 4	22
UTR5	SFPQ (4)	Non DE 5	21
UTR5	SFPQ (4)	Non DE 6	16
UTR5	SFPQ (5)	High TE	23
UTR5	SFPQ (5)	Non DE 1	12
UTR5	SFPQ (5)	Non DE 2	21
UTR5	SFPQ (5)	Non DE 3	15
UTR5	SFPQ (5)	Non DE 4	19
UTR5	SFPQ (5)	Non DE 5	25
UTR5	SFPQ (5)	Non DE 6	20
UTR5	SRSF1 (2)	High TE	9
UTR5	SRSF1 (2)	Non DE 1	24
UTR5	SRSF1 (2)	Non DE 2	28
UTR5	SRSF1 (2)	Non DE 3	19
UTR5	SRSF1 (2)	Non DE 4	16
UTR5	SRSF1 (2)	Non DE 5	17
UTR5	SRSF1 (2)	Non DE 6	17
UTR5	SRSF1 (3)	High TE	23
UTR5	SRSF1 (3)	Non DE 1	47
UTR5	SRSF1 (3)	Non DE 2	36
UTR5	SRSF1 (3)	Non DE 3	28
UTR5	SRSF1 (3)	Non DE 4	38
UTR5	SRSF1 (3)	Non DE 5	35
UTR5	SRSF1 (3)	Non DE 6	30
UTR5	SRSF1 (4)	High TE	5
UTR5	SRSF1 (4)	Non DE 1	17
UTR5	SRSF1 (4)	Non DE 2	16
UTR5	SRSF1 (4)	Non DE 3	12
UTR5	SRSF1 (4)	Non DE 4	11
UTR5	SRSF1 (4)	Non DE 5	9
UTR5	SRSF1 (4)	Non DE 6	10
UTR5	SRSF1 (5)	High TE	18
UTR5	SRSF1 (5)	Non DE 1	30
UTR5	SRSF1 (5)	Non DE 2	20
UTR5	SRSF1 (5)	Non DE 3	16
UTR5	SRSF1 (5)	Non DE 4	27
UTR5	SRSF1 (5)	Non DE 5	26
UTR5	SRSF1 (5)	Non DE 6	20
UTR5	SRSF2 (3)	High TE	16
UTR5	SRSF2 (3)	Non DE 1	12
UTR5	SRSF2 (3)	Non DE 2	5
UTR5	SRSF2 (3)	Non DE 3	12
UTR5	SRSF2 (3)	Non DE 4	14
UTR5	SRSF2 (3)	Non DE 5	17
UTR5	SRSF2 (3)	Non DE 6	14
UTR5	SRSF2 (4)	High TE	13
UTR5	SRSF2 (4)	Non DE 1	20
UTR5	SRSF2 (4)	Non DE 2	16
UTR5	SRSF2 (4)	Non DE 3	14
UTR5	SRSF2 (4)	Non DE 4	25
UTR5	SRSF2 (4)	Non DE 5	22
UTR5	SRSF2 (4)	Non DE 6	11
UTR5	SRSF4 (2)	High TE	6
UTR5	SRSF4 (2)	Non DE 1	7
UTR5	SRSF4 (2)	Non DE 2	4
UTR5	SRSF4 (2)	Non DE 3	6
UTR5	SRSF4 (2)	Non DE 4	8
UTR5	SRSF4 (2)	Non DE 5	14
UTR5	SRSF4 (2)	Non DE 6	11
UTR5	SRSF5 (2)	High TE	15
UTR5	SRSF5 (2)	Non DE 1	5
UTR5	SRSF5 (2)	Non DE 2	9
UTR5	SRSF5 (2)	Non DE 3	8
UTR5	SRSF5 (2)	Non DE 4	10
UTR5	SRSF5 (2)	Non DE 5	7
UTR5	SRSF5 (2)	Non DE 6	10
UTR5	SRSF5 (3)	High TE	7
UTR5	SRSF5 (3)	Non DE 1	13
UTR5	SRSF5 (3)	Non DE 2	7
UTR5	SRSF5 (3)	Non DE 3	15
UTR5	SRSF5 (3)	Non DE 4	12
UTR5	SRSF5 (3)	Non DE 5	15
UTR5	SRSF5 (3)	Non DE 6	13
UTR5	SRSF5 (4)	High TE	19
UTR5	SRSF5 (4)	Non DE 1	14
UTR5	SRSF5 (4)	Non DE 2	18
UTR5	SRSF5 (4)	Non DE 3	12
UTR5	SRSF5 (4)	Non DE 4	26
UTR5	SRSF5 (4)	Non DE 5	23
UTR5	SRSF5 (4)	Non DE 6	25
UTR5	SRSF5 (5)	High TE	39
UTR5	SRSF5 (5)	Non DE 1	24
UTR5	SRSF5 (5)	Non DE 2	17
UTR5	SRSF5 (5)	Non DE 3	19
UTR5	SRSF5 (5)	Non DE 4	29
UTR5	SRSF5 (5)	Non DE 5	28
UTR5	SRSF5 (5)	Non DE 6	32
UTR5	SRSF8 (1)	High TE	11
UTR5	SRSF8 (1)	Non DE 1	13
UTR5	SRSF8 (1)	Non DE 2	16
UTR5	SRSF8 (1)	Non DE 3	6
UTR5	SRSF8 (1)	Non DE 4	15
UTR5	SRSF8 (1)	Non DE 5	11
UTR5	SRSF8 (1)	Non DE 6	16
UTR5	SRSF8 (2)	High TE	14
UTR5	SRSF8 (2)	Non DE 1	12
UTR5	SRSF8 (2)	Non DE 2	12
UTR5	SRSF8 (2)	Non DE 3	15
UTR5	SRSF8 (2)	Non DE 4	12
UTR5	SRSF8 (2)	Non DE 5	13
UTR5	SRSF8 (2)	Non DE 6	13
UTR5	SRSF9 (4)	High TE	10
UTR5	SRSF9 (4)	Non DE 1	6
UTR5	SRSF9 (4)	Non DE 2	11
UTR5	SRSF9 (4)	Non DE 3	8
UTR5	SRSF9 (4)	Non DE 4	9
UTR5	SRSF9 (4)	Non DE 5	13
UTR5	SRSF9 (4)	Non DE 6	7
UTR5	TAF15 (2)	High TE	9
UTR5	TAF15 (2)	Non DE 1	5
UTR5	TAF15 (2)	Non DE 2	6
UTR5	TAF15 (2)	Non DE 3	6
UTR5	TAF15 (2)	Non DE 4	12
UTR5	TAF15 (2)	Non DE 5	11
UTR5	TAF15 (2)	Non DE 6	6
UTR5	TAF15 (3)	High TE	17
UTR5	TAF15 (3)	Non DE 1	20
UTR5	TAF15 (3)	Non DE 2	16
UTR5	TAF15 (3)	Non DE 3	18
UTR5	TAF15 (3)	Non DE 4	19
UTR5	TAF15 (3)	Non DE 5	21
UTR5	TAF15 (3)	Non DE 6	18
UTR5	TARDBP (2)	High TE	7
UTR5	TARDBP (2)	Non DE 1	9
UTR5	TARDBP (2)	Non DE 2	15
UTR5	TARDBP (2)	Non DE 3	16
UTR5	TARDBP (2)	Non DE 4	13
UTR5	TARDBP (2)	Non DE 5	10
UTR5	TARDBP (2)	Non DE 6	10
UTR5	TIA1 (1)	High TE	7
UTR5	TIA1 (1)	Non DE 1	7
UTR5	TIA1 (1)	Non DE 2	7
UTR5	TIA1 (1)	Non DE 3	6
UTR5	TIA1 (1)	Non DE 4	11
UTR5	TIA1 (1)	Non DE 5	15
UTR5	TIA1 (1)	Non DE 6	7
UTR5	TIA1 (4)	High TE	12
UTR5	TIA1 (4)	Non DE 1	12
UTR5	TIA1 (4)	Non DE 2	10
UTR5	TIA1 (4)	Non DE 3	15
UTR5	TIA1 (4)	Non DE 4	4
UTR5	TIA1 (4)	Non DE 5	7
UTR5	TIA1 (4)	Non DE 6	13
UTR5	TRA2A (2)	High TE	7
UTR5	TRA2A (2)	Non DE 1	14
UTR5	TRA2A (2)	Non DE 2	6
UTR5	TRA2A (2)	Non DE 3	8
UTR5	TRA2A (2)	Non DE 4	12
UTR5	TRA2A (2)	Non DE 5	5
UTR5	TRA2A (2)	Non DE 6	8
UTR5	TVAG002940	High TE	4
UTR5	TVAG002940	Non DE 1	20
UTR5	TVAG002940	Non DE 2	9
UTR5	TVAG002940	Non DE 3	7
UTR5	TVAG002940	Non DE 4	4
UTR5	TVAG002940	Non DE 5	9
UTR5	TVAG002940	Non DE 6	8
UTR5	TVAG514790	High TE	33
UTR5	TVAG514790	Non DE 1	54
UTR5	TVAG514790	Non DE 2	45
UTR5	TVAG514790	Non DE 3	78
UTR5	TVAG514790	Non DE 4	33
UTR5	TVAG514790	Non DE 5	32
UTR5	TVAG514790	Non DE 6	19
UTR5	U2AF2	High TE	12
UTR5	U2AF2	Non DE 1	12
UTR5	U2AF2	Non DE 2	10
UTR5	U2AF2	Non DE 3	15
UTR5	U2AF2	Non DE 4	4
UTR5	U2AF2	Non DE 5	7
UTR5	U2AF2	Non DE 6	13
UTR5	ZC3H10	High TE	13
UTR5	ZC3H10	Non DE 1	7
UTR5	ZC3H10	Non DE 2	12
UTR5	ZC3H10	Non DE 3	13
UTR5	ZC3H10	Non DE 4	9
UTR5	ZC3H10	Non DE 5	12
UTR5	ZC3H10	Non DE 6	8
UTR5	ZC3H14CONSTRUCT	High TE	5
UTR5	ZC3H14CONSTRUCT	Non DE 1	9
UTR5	ZC3H14CONSTRUCT	Non DE 2	15
UTR5	ZC3H14CONSTRUCT	Non DE 3	9
UTR5	ZC3H14CONSTRUCT	Non DE 4	11
UTR5	ZC3H14CONSTRUCT	Non DE 5	8
UTR5	ZC3H14CONSTRUCT	Non DE 6	10
CDS	A1CF (2)	High TE	58
CDS	A1CF (2)	Non DE 1	85
CDS	A1CF (2)	Non DE 2	64
CDS	A1CF (2)	Non DE 3	74
CDS	A1CF (2)	Non DE 4	73
CDS	A1CF (2)	Non DE 5	78
CDS	A1CF (2)	Non DE 6	74
CDS	A1CF (3)	High TE	8
CDS	A1CF (3)	Non DE 1	10
CDS	A1CF (3)	Non DE 2	5
CDS	A1CF (3)	Non DE 3	8
CDS	A1CF (3)	Non DE 4	4
CDS	A1CF (3)	Non DE 5	14
CDS	A1CF (3)	Non DE 6	6
CDS	A1CF (4)	High TE	16
CDS	A1CF (4)	Non DE 1	4
CDS	A1CF (4)	Non DE 2	6
CDS	A1CF (4)	Non DE 3	8
CDS	A1CF (4)	Non DE 4	2
CDS	A1CF (4)	Non DE 5	8
CDS	A1CF (4)	Non DE 6	11
CDS	A1CF (6)	High TE	4
CDS	A1CF (6)	Non DE 1	19
CDS	A1CF (6)	Non DE 2	6
CDS	A1CF (6)	Non DE 3	8
CDS	A1CF (6)	Non DE 4	14
CDS	A1CF (6)	Non DE 5	10
CDS	A1CF (6)	Non DE 6	21
CDS	A2BP1	High TE	9
CDS	A2BP1	Non DE 1	13
CDS	A2BP1	Non DE 2	12
CDS	A2BP1	Non DE 3	13
CDS	A2BP1	Non DE 4	8
CDS	A2BP1	Non DE 5	6
CDS	A2BP1	Non DE 6	8
CDS	AT1G76460TAIRG	High TE	8
CDS	AT1G76460TAIRG	Non DE 1	27
CDS	AT1G76460TAIRG	Non DE 2	23
CDS	AT1G76460TAIRG	Non DE 3	12
CDS	AT1G76460TAIRG	Non DE 4	12
CDS	AT1G76460TAIRG	Non DE 5	26
CDS	AT1G76460TAIRG	Non DE 6	16
CDS	B52	High TE	27
CDS	B52	Non DE 1	21
CDS	B52	Non DE 2	24
CDS	B52	Non DE 3	25
CDS	B52	Non DE 4	11
CDS	B52	Non DE 5	33
CDS	B52	Non DE 6	22
CDS	BOLL (4)	High TE	7
CDS	BOLL (4)	Non DE 1	16
CDS	BOLL (4)	Non DE 2	6
CDS	BOLL (4)	Non DE 3	6
CDS	BOLL (4)	Non DE 4	13
CDS	BOLL (4)	Non DE 5	14
CDS	BOLL (4)	Non DE 6	19
CDS	BRUNOL4	High TE	18
CDS	BRUNOL4	Non DE 1	14
CDS	BRUNOL4	Non DE 2	12
CDS	BRUNOL4	Non DE 3	17
CDS	BRUNOL4	Non DE 4	13
CDS	BRUNOL4	Non DE 5	18
CDS	BRUNOL4	Non DE 6	16
CDS	BRUNOL5	High TE	18
CDS	BRUNOL5	Non DE 1	14
CDS	BRUNOL5	Non DE 2	12
CDS	BRUNOL5	Non DE 3	17
CDS	BRUNOL5	Non DE 4	13
CDS	BRUNOL5	Non DE 5	18
CDS	BRUNOL5	Non DE 6	16
CDS	BRUNOL6	High TE	101
CDS	BRUNOL6	Non DE 1	80
CDS	BRUNOL6	Non DE 2	94
CDS	BRUNOL6	Non DE 3	82
CDS	BRUNOL6	Non DE 4	71
CDS	BRUNOL6	Non DE 5	102
CDS	BRUNOL6	Non DE 6	102
CDS	CELF1 (3)	High TE	8
CDS	CELF1 (3)	Non DE 1	14
CDS	CELF1 (3)	Non DE 2	18
CDS	CELF1 (3)	Non DE 3	12
CDS	CELF1 (3)	Non DE 4	11
CDS	CELF1 (3)	Non DE 5	6
CDS	CELF1 (3)	Non DE 6	11
CDS	CG17838	High TE	14
CDS	CG17838	Non DE 1	20
CDS	CG17838	Non DE 2	15
CDS	CG17838	Non DE 3	19
CDS	CG17838	Non DE 4	16
CDS	CG17838	Non DE 5	16
CDS	CG17838	Non DE 6	24
CDS	CG2950	High TE	14
CDS	CG2950	Non DE 1	6
CDS	CG2950	Non DE 2	3
CDS	CG2950	Non DE 3	3
CDS	CG2950	Non DE 4	6
CDS	CG2950	Non DE 5	4
CDS	CG2950	Non DE 6	9
CDS	CG33714	High TE	18
CDS	CG33714	Non DE 1	17
CDS	CG33714	Non DE 2	11
CDS	CG33714	Non DE 3	13
CDS	CG33714	Non DE 4	12
CDS	CG33714	Non DE 5	19
CDS	CG33714	Non DE 6	12
CDS	CG7804	High TE	30
CDS	CG7804	Non DE 1	32
CDS	CG7804	Non DE 2	33
CDS	CG7804	Non DE 3	33
CDS	CG7804	Non DE 4	31
CDS	CG7804	Non DE 5	32
CDS	CG7804	Non DE 6	25
CDS	CG7903	High TE	10
CDS	CG7903	Non DE 1	11
CDS	CG7903	Non DE 2	12
CDS	CG7903	Non DE 3	6
CDS	CG7903	Non DE 4	7
CDS	CG7903	Non DE 5	15
CDS	CG7903	Non DE 6	6
CDS	CNOT4 (1)	High TE	11
CDS	CNOT4 (1)	Non DE 1	17
CDS	CNOT4 (1)	Non DE 2	9
CDS	CNOT4 (1)	Non DE 3	9
CDS	CNOT4 (1)	Non DE 4	14
CDS	CNOT4 (1)	Non DE 5	15
CDS	CNOT4 (1)	Non DE 6	7
CDS	CNOT4 (3)	High TE	16
CDS	CNOT4 (3)	Non DE 1	11
CDS	CNOT4 (3)	Non DE 2	12
CDS	CNOT4 (3)	Non DE 3	17
CDS	CNOT4 (3)	Non DE 4	12
CDS	CNOT4 (3)	Non DE 5	15
CDS	CNOT4 (3)	Non DE 6	17
CDS	CNOT4 (4)	High TE	7
CDS	CNOT4 (4)	Non DE 1	21
CDS	CNOT4 (4)	Non DE 2	7
CDS	CNOT4 (4)	Non DE 3	5
CDS	CNOT4 (4)	Non DE 4	20
CDS	CNOT4 (4)	Non DE 5	13
CDS	CNOT4 (4)	Non DE 6	14
CDS	CNOT4 (6)	High TE	39
CDS	CNOT4 (6)	Non DE 1	42
CDS	CNOT4 (6)	Non DE 2	43
CDS	CNOT4 (6)	Non DE 3	37
CDS	CNOT4 (6)	Non DE 4	50
CDS	CNOT4 (6)	Non DE 5	40
CDS	CNOT4 (6)	Non DE 6	40
CDS	CPEB2	High TE	6
CDS	CPEB2	Non DE 1	10
CDS	CPEB2	Non DE 2	7
CDS	CPEB2	Non DE 3	7
CDS	CPEB2	Non DE 4	5
CDS	CPEB2	Non DE 5	8
CDS	CPEB2	Non DE 6	16
CDS	CPEB4	High TE	6
CDS	CPEB4	Non DE 1	10
CDS	CPEB4	Non DE 2	7
CDS	CPEB4	Non DE 3	7
CDS	CPEB4	Non DE 4	5
CDS	CPEB4	Non DE 5	8
CDS	CPEB4	Non DE 6	16
CDS	DAZ3 (1)	High TE	14
CDS	DAZ3 (1)	Non DE 1	14
CDS	DAZ3 (1)	Non DE 2	17
CDS	DAZ3 (1)	Non DE 3	12
CDS	DAZ3 (1)	Non DE 4	10
CDS	DAZ3 (1)	Non DE 5	14
CDS	DAZ3 (1)	Non DE 6	14
CDS	DAZ3 (4)	High TE	6
CDS	DAZ3 (4)	Non DE 1	14
CDS	DAZ3 (4)	Non DE 2	9
CDS	DAZ3 (4)	Non DE 3	8
CDS	DAZ3 (4)	Non DE 4	9
CDS	DAZ3 (4)	Non DE 5	6
CDS	DAZ3 (4)	Non DE 6	9
CDS	EIF4B (1)	High TE	18
CDS	EIF4B (1)	Non DE 1	19
CDS	EIF4B (1)	Non DE 2	10
CDS	EIF4B (1)	Non DE 3	19
CDS	EIF4B (1)	Non DE 4	24
CDS	EIF4B (1)	Non DE 5	17
CDS	EIF4B (1)	Non DE 6	20
CDS	EIF4B (2)	High TE	16
CDS	EIF4B (2)	Non DE 1	12
CDS	EIF4B (2)	Non DE 2	24
CDS	EIF4B (2)	Non DE 3	12
CDS	EIF4B (2)	Non DE 4	12
CDS	EIF4B (2)	Non DE 5	5
CDS	EIF4B (2)	Non DE 6	9
CDS	EIF4G2 (2)	High TE	13
CDS	EIF4G2 (2)	Non DE 1	13
CDS	EIF4G2 (2)	Non DE 2	11
CDS	EIF4G2 (2)	Non DE 3	9
CDS	EIF4G2 (2)	Non DE 4	14
CDS	EIF4G2 (2)	Non DE 5	12
CDS	EIF4G2 (2)	Non DE 6	6
CDS	EIF4G2 (3)	High TE	11
CDS	EIF4G2 (3)	Non DE 1	10
CDS	EIF4G2 (3)	Non DE 2	8
CDS	EIF4G2 (3)	Non DE 3	8
CDS	EIF4G2 (3)	Non DE 4	12
CDS	EIF4G2 (3)	Non DE 5	9
CDS	EIF4G2 (3)	Non DE 6	10
CDS	EIF4G2 (4)	High TE	17
CDS	EIF4G2 (4)	Non DE 1	26
CDS	EIF4G2 (4)	Non DE 2	29
CDS	EIF4G2 (4)	Non DE 3	18
CDS	EIF4G2 (4)	Non DE 4	14
CDS	EIF4G2 (4)	Non DE 5	16
CDS	EIF4G2 (4)	Non DE 6	20
CDS	ELAVL1 (4)	High TE	13
CDS	ELAVL1 (4)	Non DE 1	15
CDS	ELAVL1 (4)	Non DE 2	11
CDS	ELAVL1 (4)	Non DE 3	12
CDS	ELAVL1 (4)	Non DE 4	12
CDS	ELAVL1 (4)	Non DE 5	12
CDS	ELAVL1 (4)	Non DE 6	14
CDS	ELAVL4 (1)	High TE	8
CDS	ELAVL4 (1)	Non DE 1	4
CDS	ELAVL4 (1)	Non DE 2	10
CDS	ELAVL4 (1)	Non DE 3	9
CDS	ELAVL4 (1)	Non DE 4	10
CDS	ELAVL4 (1)	Non DE 5	15
CDS	ELAVL4 (1)	Non DE 6	10
CDS	ENOX1	High TE	25
CDS	ENOX1	Non DE 1	24
CDS	ENOX1	Non DE 2	30
CDS	ENOX1	Non DE 3	21
CDS	ENOX1	Non DE 4	26
CDS	ENOX1	Non DE 5	25
CDS	ENOX1	Non DE 6	29
CDS	ENSDARG00000058818	High TE	20
CDS	ENSDARG00000058818	Non DE 1	17
CDS	ENSDARG00000058818	Non DE 2	19
CDS	ENSDARG00000058818	Non DE 3	28
CDS	ENSDARG00000058818	Non DE 4	16
CDS	ENSDARG00000058818	Non DE 5	23
CDS	ENSDARG00000058818	Non DE 6	22
CDS	ENSGALG00000000814	High TE	12
CDS	ENSGALG00000000814	Non DE 1	11
CDS	ENSGALG00000000814	Non DE 2	10
CDS	ENSGALG00000000814	Non DE 3	9
CDS	ENSGALG00000000814	Non DE 4	9
CDS	ENSGALG00000000814	Non DE 5	12
CDS	ENSGALG00000000814	Non DE 6	11
CDS	ENSGALG00000014267	High TE	114
CDS	ENSGALG00000014267	Non DE 1	94
CDS	ENSGALG00000014267	Non DE 2	67
CDS	ENSGALG00000014267	Non DE 3	88
CDS	ENSGALG00000014267	Non DE 4	63
CDS	ENSGALG00000014267	Non DE 5	88
CDS	ENSGALG00000014267	Non DE 6	85
CDS	ENSXETG00000007102	High TE	28
CDS	ENSXETG00000007102	Non DE 1	41
CDS	ENSXETG00000007102	Non DE 2	29
CDS	ENSXETG00000007102	Non DE 3	37
CDS	ENSXETG00000007102	Non DE 4	35
CDS	ENSXETG00000007102	Non DE 5	41
CDS	ENSXETG00000007102	Non DE 6	50
CDS	ENSXETG00000012802	High TE	16
CDS	ENSXETG00000012802	Non DE 1	14
CDS	ENSXETG00000012802	Non DE 2	12
CDS	ENSXETG00000012802	Non DE 3	14
CDS	ENSXETG00000012802	Non DE 4	15
CDS	ENSXETG00000012802	Non DE 5	18
CDS	ENSXETG00000012802	Non DE 6	18
CDS	ENSXETG00000018075	High TE	29
CDS	ENSXETG00000018075	Non DE 1	39
CDS	ENSXETG00000018075	Non DE 2	25
CDS	ENSXETG00000018075	Non DE 3	36
CDS	ENSXETG00000018075	Non DE 4	40
CDS	ENSXETG00000018075	Non DE 5	29
CDS	ENSXETG00000018075	Non DE 6	31
CDS	ESRP1 (1)	High TE	14
CDS	ESRP1 (1)	Non DE 1	18
CDS	ESRP1 (1)	Non DE 2	26
CDS	ESRP1 (1)	Non DE 3	11
CDS	ESRP1 (1)	Non DE 4	16
CDS	ESRP1 (1)	Non DE 5	16
CDS	ESRP1 (1)	Non DE 6	6
CDS	ESRP1 (2)	High TE	58
CDS	ESRP1 (2)	Non DE 1	31
CDS	ESRP1 (2)	Non DE 2	60
CDS	ESRP1 (2)	Non DE 3	24
CDS	ESRP1 (2)	Non DE 4	43
CDS	ESRP1 (2)	Non DE 5	35
CDS	ESRP1 (2)	Non DE 6	46
CDS	ESRP1 (3)	High TE	9
CDS	ESRP1 (3)	Non DE 1	8
CDS	ESRP1 (3)	Non DE 2	8
CDS	ESRP1 (3)	Non DE 3	7
CDS	ESRP1 (3)	Non DE 4	12
CDS	ESRP1 (3)	Non DE 5	17
CDS	ESRP1 (3)	Non DE 6	13
CDS	ESRP2	High TE	12
CDS	ESRP2	Non DE 1	20
CDS	ESRP2	Non DE 2	11
CDS	ESRP2	Non DE 3	22
CDS	ESRP2	Non DE 4	11
CDS	ESRP2	Non DE 5	21
CDS	ESRP2	Non DE 6	19
CDS	EWSR1 (1)	High TE	28
CDS	EWSR1 (1)	Non DE 1	26
CDS	EWSR1 (1)	Non DE 2	37
CDS	EWSR1 (1)	Non DE 3	33
CDS	EWSR1 (1)	Non DE 4	21
CDS	EWSR1 (1)	Non DE 5	35
CDS	EWSR1 (1)	Non DE 6	26
CDS	EWSR1 (3)	High TE	28
CDS	EWSR1 (3)	Non DE 1	29
CDS	EWSR1 (3)	Non DE 2	44
CDS	EWSR1 (3)	Non DE 3	28
CDS	EWSR1 (3)	Non DE 4	28
CDS	EWSR1 (3)	Non DE 5	42
CDS	EWSR1 (3)	Non DE 6	23
CDS	EWSR1 (4)	High TE	15
CDS	EWSR1 (4)	Non DE 1	27
CDS	EWSR1 (4)	Non DE 2	25
CDS	EWSR1 (4)	Non DE 3	17
CDS	EWSR1 (4)	Non DE 4	18
CDS	EWSR1 (4)	Non DE 5	18
CDS	EWSR1 (4)	Non DE 6	24
CDS	FUBP1 (1)	High TE	8
CDS	FUBP1 (1)	Non DE 1	4
CDS	FUBP1 (1)	Non DE 2	10
CDS	FUBP1 (1)	Non DE 3	9
CDS	FUBP1 (1)	Non DE 4	10
CDS	FUBP1 (1)	Non DE 5	15
CDS	FUBP1 (1)	Non DE 6	10
CDS	FUBP1 (4)	High TE	12
CDS	FUBP1 (4)	Non DE 1	10
CDS	FUBP1 (4)	Non DE 2	9
CDS	FUBP1 (4)	Non DE 3	12
CDS	FUBP1 (4)	Non DE 4	17
CDS	FUBP1 (4)	Non DE 5	15
CDS	FUBP1 (4)	Non DE 6	13
CDS	FUS (1)	High TE	17
CDS	FUS (1)	Non DE 1	16
CDS	FUS (1)	Non DE 2	26
CDS	FUS (1)	Non DE 3	14
CDS	FUS (1)	Non DE 4	14
CDS	FUS (1)	Non DE 5	11
CDS	FUS (1)	Non DE 6	19
CDS	FUS (2)	High TE	8
CDS	FUS (2)	Non DE 1	8
CDS	FUS (2)	Non DE 2	8
CDS	FUS (2)	Non DE 3	6
CDS	FUS (2)	Non DE 4	17
CDS	FUS (2)	Non DE 5	5
CDS	FUS (2)	Non DE 6	10
CDS	FXR2	High TE	49
CDS	FXR2	Non DE 1	22
CDS	FXR2	Non DE 2	33
CDS	FXR2	Non DE 3	39
CDS	FXR2	Non DE 4	32
CDS	FXR2	Non DE 5	43
CDS	FXR2	Non DE 6	30
CDS	G3BP2	High TE	45
CDS	G3BP2	Non DE 1	49
CDS	G3BP2	Non DE 2	37
CDS	G3BP2	Non DE 3	36
CDS	G3BP2	Non DE 4	37
CDS	G3BP2	Non DE 5	40
CDS	G3BP2	Non DE 6	50
CDS	HNRNPA2B1 (1)	High TE	23
CDS	HNRNPA2B1 (1)	Non DE 1	25
CDS	HNRNPA2B1 (1)	Non DE 2	37
CDS	HNRNPA2B1 (1)	Non DE 3	20
CDS	HNRNPA2B1 (1)	Non DE 4	26
CDS	HNRNPA2B1 (1)	Non DE 5	29
CDS	HNRNPA2B1 (1)	Non DE 6	32
CDS	HNRNPA2B1 (3)	High TE	5
CDS	HNRNPA2B1 (3)	Non DE 1	11
CDS	HNRNPA2B1 (3)	Non DE 2	11
CDS	HNRNPA2B1 (3)	Non DE 3	7
CDS	HNRNPA2B1 (3)	Non DE 4	13
CDS	HNRNPA2B1 (3)	Non DE 5	14
CDS	HNRNPA2B1 (3)	Non DE 6	15
CDS	HNRNPC (2)	High TE	7
CDS	HNRNPC (2)	Non DE 1	15
CDS	HNRNPC (2)	Non DE 2	8
CDS	HNRNPC (2)	Non DE 3	7
CDS	HNRNPC (2)	Non DE 4	13
CDS	HNRNPC (2)	Non DE 5	16
CDS	HNRNPC (2)	Non DE 6	13
CDS	HNRNPC (3)	High TE	7
CDS	HNRNPC (3)	Non DE 1	16
CDS	HNRNPC (3)	Non DE 2	6
CDS	HNRNPC (3)	Non DE 3	6
CDS	HNRNPC (3)	Non DE 4	13
CDS	HNRNPC (3)	Non DE 5	14
CDS	HNRNPC (3)	Non DE 6	19
CDS	HNRNPCL1 (3)	High TE	7
CDS	HNRNPCL1 (3)	Non DE 1	16
CDS	HNRNPCL1 (3)	Non DE 2	6
CDS	HNRNPCL1 (3)	Non DE 3	6
CDS	HNRNPCL1 (3)	Non DE 4	13
CDS	HNRNPCL1 (3)	Non DE 5	14
CDS	HNRNPCL1 (3)	Non DE 6	19
CDS	HNRNPD (3)	High TE	5
CDS	HNRNPD (3)	Non DE 1	18
CDS	HNRNPD (3)	Non DE 2	15
CDS	HNRNPD (3)	Non DE 3	11
CDS	HNRNPD (3)	Non DE 4	5
CDS	HNRNPD (3)	Non DE 5	13
CDS	HNRNPD (3)	Non DE 6	18
CDS	HNRNPF (1)	High TE	14
CDS	HNRNPF (1)	Non DE 1	16
CDS	HNRNPF (1)	Non DE 2	25
CDS	HNRNPF (1)	Non DE 3	11
CDS	HNRNPF (1)	Non DE 4	13
CDS	HNRNPF (1)	Non DE 5	16
CDS	HNRNPF (1)	Non DE 6	18
CDS	HNRNPF (2)	High TE	14
CDS	HNRNPF (2)	Non DE 1	20
CDS	HNRNPF (2)	Non DE 2	21
CDS	HNRNPF (2)	Non DE 3	14
CDS	HNRNPF (2)	Non DE 4	19
CDS	HNRNPF (2)	Non DE 5	18
CDS	HNRNPF (2)	Non DE 6	12
CDS	HNRNPH2 (1)	High TE	24
CDS	HNRNPH2 (1)	Non DE 1	29
CDS	HNRNPH2 (1)	Non DE 2	41
CDS	HNRNPH2 (1)	Non DE 3	44
CDS	HNRNPH2 (1)	Non DE 4	28
CDS	HNRNPH2 (1)	Non DE 5	44
CDS	HNRNPH2 (1)	Non DE 6	34
CDS	HNRNPH2 (2)	High TE	12
CDS	HNRNPH2 (2)	Non DE 1	19
CDS	HNRNPH2 (2)	Non DE 2	30
CDS	HNRNPH2 (2)	Non DE 3	25
CDS	HNRNPH2 (2)	Non DE 4	13
CDS	HNRNPH2 (2)	Non DE 5	27
CDS	HNRNPH2 (2)	Non DE 6	14
CDS	HNRNPH2 (3)	High TE	14
CDS	HNRNPH2 (3)	Non DE 1	16
CDS	HNRNPH2 (3)	Non DE 2	25
CDS	HNRNPH2 (3)	Non DE 3	11
CDS	HNRNPH2 (3)	Non DE 4	13
CDS	HNRNPH2 (3)	Non DE 5	16
CDS	HNRNPH2 (3)	Non DE 6	18
CDS	HNRNPK (1)	High TE	38
CDS	HNRNPK (1)	Non DE 1	31
CDS	HNRNPK (1)	Non DE 2	36
CDS	HNRNPK (1)	Non DE 3	50
CDS	HNRNPK (1)	Non DE 4	37
CDS	HNRNPK (1)	Non DE 5	44
CDS	HNRNPK (1)	Non DE 6	47
CDS	HNRNPK (3)	High TE	13
CDS	HNRNPK (3)	Non DE 1	8
CDS	HNRNPK (3)	Non DE 2	9
CDS	HNRNPK (3)	Non DE 3	6
CDS	HNRNPK (3)	Non DE 4	7
CDS	HNRNPK (3)	Non DE 5	9
CDS	HNRNPK (3)	Non DE 6	5
CDS	HNRNPK (4)	High TE	66
CDS	HNRNPK (4)	Non DE 1	71
CDS	HNRNPK (4)	Non DE 2	66
CDS	HNRNPK (4)	Non DE 3	67
CDS	HNRNPK (4)	Non DE 4	65
CDS	HNRNPK (4)	Non DE 5	78
CDS	HNRNPK (4)	Non DE 6	62
CDS	HNRNPK (5)	High TE	21
CDS	HNRNPK (5)	Non DE 1	29
CDS	HNRNPK (5)	Non DE 2	14
CDS	HNRNPK (5)	Non DE 3	18
CDS	HNRNPK (5)	Non DE 4	21
CDS	HNRNPK (5)	Non DE 5	21
CDS	HNRNPK (5)	Non DE 6	16
CDS	HNRNPL (3)	High TE	11
CDS	HNRNPL (3)	Non DE 1	17
CDS	HNRNPL (3)	Non DE 2	9
CDS	HNRNPL (3)	Non DE 3	9
CDS	HNRNPL (3)	Non DE 4	14
CDS	HNRNPL (3)	Non DE 5	15
CDS	HNRNPL (3)	Non DE 6	7
CDS	HNRNPL (4)	High TE	5
CDS	HNRNPL (4)	Non DE 1	23
CDS	HNRNPL (4)	Non DE 2	15
CDS	HNRNPL (4)	Non DE 3	19
CDS	HNRNPL (4)	Non DE 4	12
CDS	HNRNPL (4)	Non DE 5	14
CDS	HNRNPL (4)	Non DE 6	8
CDS	IGF2BP1 (2)	High TE	11
CDS	IGF2BP1 (2)	Non DE 1	17
CDS	IGF2BP1 (2)	Non DE 2	9
CDS	IGF2BP1 (2)	Non DE 3	3
CDS	IGF2BP1 (2)	Non DE 4	8
CDS	IGF2BP1 (2)	Non DE 5	18
CDS	IGF2BP1 (2)	Non DE 6	10
CDS	IGF2BP1 (3)	High TE	43
CDS	IGF2BP1 (3)	Non DE 1	50
CDS	IGF2BP1 (3)	Non DE 2	40
CDS	IGF2BP1 (3)	Non DE 3	47
CDS	IGF2BP1 (3)	Non DE 4	42
CDS	IGF2BP1 (3)	Non DE 5	36
CDS	IGF2BP1 (3)	Non DE 6	33
CDS	IGF2BP2 (2)	High TE	11
CDS	IGF2BP2 (2)	Non DE 1	25
CDS	IGF2BP2 (2)	Non DE 2	14
CDS	IGF2BP2 (2)	Non DE 3	14
CDS	IGF2BP2 (2)	Non DE 4	16
CDS	IGF2BP2 (2)	Non DE 5	11
CDS	IGF2BP2 (2)	Non DE 6	16
CDS	IGF2BP2 (3)	High TE	19
CDS	IGF2BP2 (3)	Non DE 1	30
CDS	IGF2BP2 (3)	Non DE 2	32
CDS	IGF2BP2 (3)	Non DE 3	12
CDS	IGF2BP2 (3)	Non DE 4	21
CDS	IGF2BP2 (3)	Non DE 5	33
CDS	IGF2BP2 (3)	Non DE 6	27
CDS	IGF2BP2 (4)	High TE	22
CDS	IGF2BP2 (4)	Non DE 1	14
CDS	IGF2BP2 (4)	Non DE 2	18
CDS	IGF2BP2 (4)	Non DE 3	18
CDS	IGF2BP2 (4)	Non DE 4	21
CDS	IGF2BP2 (4)	Non DE 5	11
CDS	IGF2BP2 (4)	Non DE 6	14
CDS	IGF2BP2 (5)	High TE	11
CDS	IGF2BP2 (5)	Non DE 1	25
CDS	IGF2BP2 (5)	Non DE 2	14
CDS	IGF2BP2 (5)	Non DE 3	14
CDS	IGF2BP2 (5)	Non DE 4	16
CDS	IGF2BP2 (5)	Non DE 5	11
CDS	IGF2BP2 (5)	Non DE 6	16
CDS	IGF2BP3	High TE	11
CDS	IGF2BP3	Non DE 1	25
CDS	IGF2BP3	Non DE 2	14
CDS	IGF2BP3	Non DE 3	14
CDS	IGF2BP3	Non DE 4	16
CDS	IGF2BP3	Non DE 5	11
CDS	IGF2BP3	Non DE 6	16
CDS	ILF2 (1)	High TE	28
CDS	ILF2 (1)	Non DE 1	26
CDS	ILF2 (1)	Non DE 2	37
CDS	ILF2 (1)	Non DE 3	33
CDS	ILF2 (1)	Non DE 4	21
CDS	ILF2 (1)	Non DE 5	35
CDS	ILF2 (1)	Non DE 6	26
CDS	ILF2 (3)	High TE	39
CDS	ILF2 (3)	Non DE 1	26
CDS	ILF2 (3)	Non DE 2	29
CDS	ILF2 (3)	Non DE 3	33
CDS	ILF2 (3)	Non DE 4	24
CDS	ILF2 (3)	Non DE 5	38
CDS	ILF2 (3)	Non DE 6	36
CDS	KHDRBS2 (1)	High TE	7
CDS	KHDRBS2 (1)	Non DE 1	21
CDS	KHDRBS2 (1)	Non DE 2	14
CDS	KHDRBS2 (1)	Non DE 3	20
CDS	KHDRBS2 (1)	Non DE 4	16
CDS	KHDRBS2 (1)	Non DE 5	15
CDS	KHDRBS2 (1)	Non DE 6	18
CDS	KHDRBS2 (4)	High TE	9
CDS	KHDRBS2 (4)	Non DE 1	13
CDS	KHDRBS2 (4)	Non DE 2	17
CDS	KHDRBS2 (4)	Non DE 3	15
CDS	KHDRBS2 (4)	Non DE 4	19
CDS	KHDRBS2 (4)	Non DE 5	15
CDS	KHDRBS2 (4)	Non DE 6	9
CDS	KHDRBS3 (2)	High TE	13
CDS	KHDRBS3 (2)	Non DE 1	20
CDS	KHDRBS3 (2)	Non DE 2	22
CDS	KHDRBS3 (2)	Non DE 3	16
CDS	KHDRBS3 (2)	Non DE 4	20
CDS	KHDRBS3 (2)	Non DE 5	15
CDS	KHDRBS3 (2)	Non DE 6	44
CDS	LIN28A (1)	High TE	20
CDS	LIN28A (1)	Non DE 1	17
CDS	LIN28A (1)	Non DE 2	9
CDS	LIN28A (1)	Non DE 3	16
CDS	LIN28A (1)	Non DE 4	13
CDS	LIN28A (1)	Non DE 5	18
CDS	LIN28A (1)	Non DE 6	11
CDS	LIN28A (2)	High TE	24
CDS	LIN28A (2)	Non DE 1	26
CDS	LIN28A (2)	Non DE 2	22
CDS	LIN28A (2)	Non DE 3	24
CDS	LIN28A (2)	Non DE 4	23
CDS	LIN28A (2)	Non DE 5	21
CDS	LIN28A (2)	Non DE 6	29
CDS	MATR3	High TE	10
CDS	MATR3	Non DE 1	15
CDS	MATR3	Non DE 2	7
CDS	MATR3	Non DE 3	4
CDS	MATR3	Non DE 4	11
CDS	MATR3	Non DE 5	18
CDS	MATR3	Non DE 6	5
CDS	MBNL1 (1)	High TE	13
CDS	MBNL1 (1)	Non DE 1	12
CDS	MBNL1 (1)	Non DE 2	17
CDS	MBNL1 (1)	Non DE 3	9
CDS	MBNL1 (1)	Non DE 4	12
CDS	MBNL1 (1)	Non DE 5	19
CDS	MBNL1 (1)	Non DE 6	12
CDS	MBNL1 (2)	High TE	22
CDS	MBNL1 (2)	Non DE 1	28
CDS	MBNL1 (2)	Non DE 2	16
CDS	MBNL1 (2)	Non DE 3	32
CDS	MBNL1 (2)	Non DE 4	19
CDS	MBNL1 (2)	Non DE 5	21
CDS	MBNL1 (2)	Non DE 6	24
CDS	MBNL1 (5)	High TE	13
CDS	MBNL1 (5)	Non DE 1	13
CDS	MBNL1 (5)	Non DE 2	15
CDS	MBNL1 (5)	Non DE 3	4
CDS	MBNL1 (5)	Non DE 4	6
CDS	MBNL1 (5)	Non DE 5	15
CDS	MBNL1 (5)	Non DE 6	13
CDS	NAB2CONSTRUCT	High TE	28
CDS	NAB2CONSTRUCT	Non DE 1	41
CDS	NAB2CONSTRUCT	Non DE 2	29
CDS	NAB2CONSTRUCT	Non DE 3	37
CDS	NAB2CONSTRUCT	Non DE 4	35
CDS	NAB2CONSTRUCT	Non DE 5	41
CDS	NAB2CONSTRUCT	Non DE 6	50
CDS	NCU02404	High TE	43
CDS	NCU02404	Non DE 1	73
CDS	NCU02404	Non DE 2	48
CDS	NCU02404	Non DE 3	53
CDS	NCU02404	Non DE 4	58
CDS	NCU02404	Non DE 5	54
CDS	NCU02404	Non DE 6	65
CDS	NOVA1 (4)	High TE	33
CDS	NOVA1 (4)	Non DE 1	24
CDS	NOVA1 (4)	Non DE 2	25
CDS	NOVA1 (4)	Non DE 3	31
CDS	NOVA1 (4)	Non DE 4	18
CDS	NOVA1 (4)	Non DE 5	23
CDS	NOVA1 (4)	Non DE 6	21
CDS	NUPL2 (1)	High TE	11
CDS	NUPL2 (1)	Non DE 1	35
CDS	NUPL2 (1)	Non DE 2	20
CDS	NUPL2 (1)	Non DE 3	26
CDS	NUPL2 (1)	Non DE 4	30
CDS	NUPL2 (1)	Non DE 5	20
CDS	NUPL2 (1)	Non DE 6	35
CDS	NUPL2 (2)	High TE	42
CDS	NUPL2 (2)	Non DE 1	56
CDS	NUPL2 (2)	Non DE 2	34
CDS	NUPL2 (2)	Non DE 3	54
CDS	NUPL2 (2)	Non DE 4	46
CDS	NUPL2 (2)	Non DE 5	52
CDS	NUPL2 (2)	Non DE 6	33
CDS	NUPL2 (3)	High TE	18
CDS	NUPL2 (3)	Non DE 1	6
CDS	NUPL2 (3)	Non DE 2	11
CDS	NUPL2 (3)	Non DE 3	9
CDS	NUPL2 (3)	Non DE 4	8
CDS	NUPL2 (3)	Non DE 5	18
CDS	NUPL2 (3)	Non DE 6	14
CDS	NUPL2 (4)	High TE	31
CDS	NUPL2 (4)	Non DE 1	47
CDS	NUPL2 (4)	Non DE 2	37
CDS	NUPL2 (4)	Non DE 3	40
CDS	NUPL2 (4)	Non DE 4	55
CDS	NUPL2 (4)	Non DE 5	50
CDS	NUPL2 (4)	Non DE 6	52
CDS	NUPL2 (5)	High TE	17
CDS	NUPL2 (5)	Non DE 1	14
CDS	NUPL2 (5)	Non DE 2	5
CDS	NUPL2 (5)	Non DE 3	14
CDS	NUPL2 (5)	Non DE 4	14
CDS	NUPL2 (5)	Non DE 5	17
CDS	NUPL2 (5)	Non DE 6	12
CDS	NUPL2 (6)	High TE	26
CDS	NUPL2 (6)	Non DE 1	33
CDS	NUPL2 (6)	Non DE 2	32
CDS	NUPL2 (6)	Non DE 3	24
CDS	NUPL2 (6)	Non DE 4	33
CDS	NUPL2 (6)	Non DE 5	25
CDS	NUPL2 (6)	Non DE 6	40
CDS	NUPL2 (7)	High TE	62
CDS	NUPL2 (7)	Non DE 1	75
CDS	NUPL2 (7)	Non DE 2	57
CDS	NUPL2 (7)	Non DE 3	60
CDS	NUPL2 (7)	Non DE 4	55
CDS	NUPL2 (7)	Non DE 5	55
CDS	NUPL2 (7)	Non DE 6	50
CDS	PABPC1 (1)	High TE	59
CDS	PABPC1 (1)	Non DE 1	105
CDS	PABPC1 (1)	Non DE 2	58
CDS	PABPC1 (1)	Non DE 3	65
CDS	PABPC1 (1)	Non DE 4	82
CDS	PABPC1 (1)	Non DE 5	66
CDS	PABPC1 (1)	Non DE 6	87
CDS	PABPC3	High TE	14
CDS	PABPC3	Non DE 1	28
CDS	PABPC3	Non DE 2	13
CDS	PABPC3	Non DE 3	28
CDS	PABPC3	Non DE 4	27
CDS	PABPC3	Non DE 5	20
CDS	PABPC3	Non DE 6	23
CDS	PABPC4	High TE	20
CDS	PABPC4	Non DE 1	39
CDS	PABPC4	Non DE 2	17
CDS	PABPC4	Non DE 3	23
CDS	PABPC4	Non DE 4	46
CDS	PABPC4	Non DE 5	37
CDS	PABPC4	Non DE 6	49
CDS	PABPC5	High TE	34
CDS	PABPC5	Non DE 1	70
CDS	PABPC5	Non DE 2	62
CDS	PABPC5	Non DE 3	53
CDS	PABPC5	Non DE 4	60
CDS	PABPC5	Non DE 5	60
CDS	PABPC5	Non DE 6	52
CDS	PABPN1	High TE	34
CDS	PABPN1	Non DE 1	32
CDS	PABPN1	Non DE 2	34
CDS	PABPN1	Non DE 3	30
CDS	PABPN1	Non DE 4	44
CDS	PABPN1	Non DE 5	35
CDS	PABPN1	Non DE 6	33
CDS	PABPN1L (1)	High TE	11
CDS	PABPN1L (1)	Non DE 1	35
CDS	PABPN1L (1)	Non DE 2	20
CDS	PABPN1L (1)	Non DE 3	26
CDS	PABPN1L (1)	Non DE 4	30
CDS	PABPN1L (1)	Non DE 5	20
CDS	PABPN1L (1)	Non DE 6	35
CDS	PABPN1L (2)	High TE	10
CDS	PABPN1L (2)	Non DE 1	30
CDS	PABPN1L (2)	Non DE 2	15
CDS	PABPN1L (2)	Non DE 3	22
CDS	PABPN1L (2)	Non DE 4	26
CDS	PABPN1L (2)	Non DE 5	18
CDS	PABPN1L (2)	Non DE 6	15
CDS	PCBP1 (1)	High TE	21
CDS	PCBP1 (1)	Non DE 1	20
CDS	PCBP1 (1)	Non DE 2	26
CDS	PCBP1 (1)	Non DE 3	24
CDS	PCBP1 (1)	Non DE 4	15
CDS	PCBP1 (1)	Non DE 5	32
CDS	PCBP1 (1)	Non DE 6	16
CDS	PCBP1 (3)	High TE	24
CDS	PCBP1 (3)	Non DE 1	22
CDS	PCBP1 (3)	Non DE 2	19
CDS	PCBP1 (3)	Non DE 3	23
CDS	PCBP1 (3)	Non DE 4	22
CDS	PCBP1 (3)	Non DE 5	22
CDS	PCBP1 (3)	Non DE 6	23
CDS	PCBP1 (4)	High TE	38
CDS	PCBP1 (4)	Non DE 1	37
CDS	PCBP1 (4)	Non DE 2	21
CDS	PCBP1 (4)	Non DE 3	29
CDS	PCBP1 (4)	Non DE 4	27
CDS	PCBP1 (4)	Non DE 5	31
CDS	PCBP1 (4)	Non DE 6	30
CDS	PCBP1 (5)	High TE	23
CDS	PCBP1 (5)	Non DE 1	27
CDS	PCBP1 (5)	Non DE 2	22
CDS	PCBP1 (5)	Non DE 3	19
CDS	PCBP1 (5)	Non DE 4	24
CDS	PCBP1 (5)	Non DE 5	29
CDS	PCBP1 (5)	Non DE 6	23
CDS	PCBP2 (1)	High TE	45
CDS	PCBP2 (1)	Non DE 1	54
CDS	PCBP2 (1)	Non DE 2	50
CDS	PCBP2 (1)	Non DE 3	36
CDS	PCBP2 (1)	Non DE 4	38
CDS	PCBP2 (1)	Non DE 5	54
CDS	PCBP2 (1)	Non DE 6	51
CDS	PCBP2 (2)	High TE	28
CDS	PCBP2 (2)	Non DE 1	30
CDS	PCBP2 (2)	Non DE 2	25
CDS	PCBP2 (2)	Non DE 3	31
CDS	PCBP2 (2)	Non DE 4	24
CDS	PCBP2 (2)	Non DE 5	21
CDS	PCBP2 (2)	Non DE 6	27
CDS	PCBP2 (4)	High TE	11
CDS	PCBP2 (4)	Non DE 1	9
CDS	PCBP2 (4)	Non DE 2	14
CDS	PCBP2 (4)	Non DE 3	13
CDS	PCBP2 (4)	Non DE 4	21
CDS	PCBP2 (4)	Non DE 5	19
CDS	PCBP2 (4)	Non DE 6	19
CDS	PCBP2 (5)	High TE	34
CDS	PCBP2 (5)	Non DE 1	22
CDS	PCBP2 (5)	Non DE 2	30
CDS	PCBP2 (5)	Non DE 3	24
CDS	PCBP2 (5)	Non DE 4	14
CDS	PCBP2 (5)	Non DE 5	26
CDS	PCBP2 (5)	Non DE 6	28
CDS	PCBP2 (6)	High TE	28
CDS	PCBP2 (6)	Non DE 1	30
CDS	PCBP2 (6)	Non DE 2	25
CDS	PCBP2 (6)	Non DE 3	31
CDS	PCBP2 (6)	Non DE 4	24
CDS	PCBP2 (6)	Non DE 5	21
CDS	PCBP2 (6)	Non DE 6	27
CDS	PCBP2 (7)	High TE	9
CDS	PCBP2 (7)	Non DE 1	15
CDS	PCBP2 (7)	Non DE 2	12
CDS	PCBP2 (7)	Non DE 3	12
CDS	PCBP2 (7)	Non DE 4	13
CDS	PCBP2 (7)	Non DE 5	15
CDS	PCBP2 (7)	Non DE 6	15
CDS	PCBP4 (1)	High TE	28
CDS	PCBP4 (1)	Non DE 1	30
CDS	PCBP4 (1)	Non DE 2	25
CDS	PCBP4 (1)	Non DE 3	31
CDS	PCBP4 (1)	Non DE 4	24
CDS	PCBP4 (1)	Non DE 5	21
CDS	PCBP4 (1)	Non DE 6	27
CDS	PCBP4 (3)	High TE	11
CDS	PCBP4 (3)	Non DE 1	24
CDS	PCBP4 (3)	Non DE 2	19
CDS	PCBP4 (3)	Non DE 3	15
CDS	PCBP4 (3)	Non DE 4	13
CDS	PCBP4 (3)	Non DE 5	21
CDS	PCBP4 (3)	Non DE 6	22
CDS	PF130315	High TE	7
CDS	PF130315	Non DE 1	6
CDS	PF130315	Non DE 2	8
CDS	PF130315	Non DE 3	1
CDS	PF130315	Non DE 4	14
CDS	PF130315	Non DE 5	8
CDS	PF130315	Non DE 6	9
CDS	PRR3 (3)	High TE	9
CDS	PRR3 (3)	Non DE 1	21
CDS	PRR3 (3)	Non DE 2	13
CDS	PRR3 (3)	Non DE 3	15
CDS	PRR3 (3)	Non DE 4	17
CDS	PRR3 (3)	Non DE 5	13
CDS	PRR3 (3)	Non DE 6	16
CDS	PTBP1 (1)	High TE	9
CDS	PTBP1 (1)	Non DE 1	25
CDS	PTBP1 (1)	Non DE 2	9
CDS	PTBP1 (1)	Non DE 3	15
CDS	PTBP1 (1)	Non DE 4	12
CDS	PTBP1 (1)	Non DE 5	14
CDS	PTBP1 (1)	Non DE 6	14
CDS	PTBP1 (2)	High TE	14
CDS	PTBP1 (2)	Non DE 1	11
CDS	PTBP1 (2)	Non DE 2	6
CDS	PTBP1 (2)	Non DE 3	8
CDS	PTBP1 (2)	Non DE 4	11
CDS	PTBP1 (2)	Non DE 5	16
CDS	PTBP1 (2)	Non DE 6	16
CDS	PTBP3 (1)	High TE	7
CDS	PTBP3 (1)	Non DE 1	14
CDS	PTBP3 (1)	Non DE 2	23
CDS	PTBP3 (1)	Non DE 3	9
CDS	PTBP3 (1)	Non DE 4	20
CDS	PTBP3 (1)	Non DE 5	12
CDS	PTBP3 (1)	Non DE 6	19
CDS	PUF60 (2)	High TE	10
CDS	PUF60 (2)	Non DE 1	19
CDS	PUF60 (2)	Non DE 2	11
CDS	PUF60 (2)	Non DE 3	16
CDS	PUF60 (2)	Non DE 4	19
CDS	PUF60 (2)	Non DE 5	19
CDS	PUF60 (2)	Non DE 6	21
CDS	PUM1 (1)	High TE	10
CDS	PUM1 (1)	Non DE 1	16
CDS	PUM1 (1)	Non DE 2	11
CDS	PUM1 (1)	Non DE 3	13
CDS	PUM1 (1)	Non DE 4	19
CDS	PUM1 (1)	Non DE 5	14
CDS	PUM1 (1)	Non DE 6	21
CDS	PUM1 (2)	High TE	14
CDS	PUM1 (2)	Non DE 1	10
CDS	PUM1 (2)	Non DE 2	12
CDS	PUM1 (2)	Non DE 3	22
CDS	PUM1 (2)	Non DE 4	8
CDS	PUM1 (2)	Non DE 5	19
CDS	PUM1 (2)	Non DE 6	8
CDS	RALY	High TE	7
CDS	RALY	Non DE 1	16
CDS	RALY	Non DE 2	12
CDS	RALY	Non DE 3	11
CDS	RALY	Non DE 4	8
CDS	RALY	Non DE 5	15
CDS	RALY	Non DE 6	14
CDS	RALYL (1)	High TE	8
CDS	RALYL (1)	Non DE 1	22
CDS	RALYL (1)	Non DE 2	11
CDS	RALYL (1)	Non DE 3	6
CDS	RALYL (1)	Non DE 4	16
CDS	RALYL (1)	Non DE 5	15
CDS	RALYL (1)	Non DE 6	19
CDS	RALYL (2)	High TE	7
CDS	RALYL (2)	Non DE 1	15
CDS	RALYL (2)	Non DE 2	8
CDS	RALYL (2)	Non DE 3	7
CDS	RALYL (2)	Non DE 4	13
CDS	RALYL (2)	Non DE 5	16
CDS	RALYL (2)	Non DE 6	13
CDS	RBFOX2	High TE	16
CDS	RBFOX2	Non DE 1	31
CDS	RBFOX2	Non DE 2	25
CDS	RBFOX2	Non DE 3	23
CDS	RBFOX2	Non DE 4	16
CDS	RBFOX2	Non DE 5	17
CDS	RBFOX2	Non DE 6	16
CDS	RBFOX3	High TE	9
CDS	RBFOX3	Non DE 1	13
CDS	RBFOX3	Non DE 2	12
CDS	RBFOX3	Non DE 3	13
CDS	RBFOX3	Non DE 4	8
CDS	RBFOX3	Non DE 5	6
CDS	RBFOX3	Non DE 6	8
CDS	RBM15B (1)	High TE	8
CDS	RBM15B (1)	Non DE 1	4
CDS	RBM15B (1)	Non DE 2	10
CDS	RBM15B (1)	Non DE 3	9
CDS	RBM15B (1)	Non DE 4	10
CDS	RBM15B (1)	Non DE 5	15
CDS	RBM15B (1)	Non DE 6	10
CDS	RBM15B (3)	High TE	10
CDS	RBM15B (3)	Non DE 1	16
CDS	RBM15B (3)	Non DE 2	12
CDS	RBM15B (3)	Non DE 3	8
CDS	RBM15B (3)	Non DE 4	8
CDS	RBM15B (3)	Non DE 5	13
CDS	RBM15B (3)	Non DE 6	8
CDS	RBM23 (1)	High TE	25
CDS	RBM23 (1)	Non DE 1	22
CDS	RBM23 (1)	Non DE 2	30
CDS	RBM23 (1)	Non DE 3	26
CDS	RBM23 (1)	Non DE 4	27
CDS	RBM23 (1)	Non DE 5	32
CDS	RBM23 (1)	Non DE 6	29
CDS	RBM23 (2)	High TE	7
CDS	RBM23 (2)	Non DE 1	22
CDS	RBM23 (2)	Non DE 2	13
CDS	RBM23 (2)	Non DE 3	10
CDS	RBM23 (2)	Non DE 4	11
CDS	RBM23 (2)	Non DE 5	9
CDS	RBM23 (2)	Non DE 6	11
CDS	RBM24 (1)	High TE	9
CDS	RBM24 (1)	Non DE 1	17
CDS	RBM24 (1)	Non DE 2	12
CDS	RBM24 (1)	Non DE 3	14
CDS	RBM24 (1)	Non DE 4	12
CDS	RBM24 (1)	Non DE 5	8
CDS	RBM24 (1)	Non DE 6	13
CDS	RBM24 (2)	High TE	20
CDS	RBM24 (2)	Non DE 1	17
CDS	RBM24 (2)	Non DE 2	19
CDS	RBM24 (2)	Non DE 3	28
CDS	RBM24 (2)	Non DE 4	16
CDS	RBM24 (2)	Non DE 5	23
CDS	RBM24 (2)	Non DE 6	22
CDS	RBM24 (3)	High TE	8
CDS	RBM24 (3)	Non DE 1	27
CDS	RBM24 (3)	Non DE 2	23
CDS	RBM24 (3)	Non DE 3	12
CDS	RBM24 (3)	Non DE 4	12
CDS	RBM24 (3)	Non DE 5	26
CDS	RBM24 (3)	Non DE 6	16
CDS	RBM25 (1)	High TE	37
CDS	RBM25 (1)	Non DE 1	43
CDS	RBM25 (1)	Non DE 2	63
CDS	RBM25 (1)	Non DE 3	31
CDS	RBM25 (1)	Non DE 4	42
CDS	RBM25 (1)	Non DE 5	45
CDS	RBM25 (1)	Non DE 6	38
CDS	RBM25 (2)	High TE	23
CDS	RBM25 (2)	Non DE 1	26
CDS	RBM25 (2)	Non DE 2	20
CDS	RBM25 (2)	Non DE 3	18
CDS	RBM25 (2)	Non DE 4	13
CDS	RBM25 (2)	Non DE 5	21
CDS	RBM25 (2)	Non DE 6	20
CDS	RBM25 (3)	High TE	33
CDS	RBM25 (3)	Non DE 1	33
CDS	RBM25 (3)	Non DE 2	43
CDS	RBM25 (3)	Non DE 3	40
CDS	RBM25 (3)	Non DE 4	35
CDS	RBM25 (3)	Non DE 5	54
CDS	RBM25 (3)	Non DE 6	25
CDS	RBM4 (2)	High TE	9
CDS	RBM4 (2)	Non DE 1	14
CDS	RBM4 (2)	Non DE 2	6
CDS	RBM4 (2)	Non DE 3	7
CDS	RBM4 (2)	Non DE 4	5
CDS	RBM4 (2)	Non DE 5	10
CDS	RBM4 (2)	Non DE 6	5
CDS	RBM4 (4)	High TE	5
CDS	RBM4 (4)	Non DE 1	15
CDS	RBM4 (4)	Non DE 2	22
CDS	RBM4 (4)	Non DE 3	12
CDS	RBM4 (4)	Non DE 4	9
CDS	RBM4 (4)	Non DE 5	12
CDS	RBM4 (4)	Non DE 6	20
CDS	RBM4 (5)	High TE	5
CDS	RBM4 (5)	Non DE 1	15
CDS	RBM4 (5)	Non DE 2	22
CDS	RBM4 (5)	Non DE 3	12
CDS	RBM4 (5)	Non DE 4	9
CDS	RBM4 (5)	Non DE 5	12
CDS	RBM4 (5)	Non DE 6	20
CDS	RBM41 (3)	High TE	11
CDS	RBM41 (3)	Non DE 1	21
CDS	RBM41 (3)	Non DE 2	16
CDS	RBM41 (3)	Non DE 3	10
CDS	RBM41 (3)	Non DE 4	19
CDS	RBM41 (3)	Non DE 5	15
CDS	RBM41 (3)	Non DE 6	16
CDS	RBM45 (4)	High TE	15
CDS	RBM45 (4)	Non DE 1	30
CDS	RBM45 (4)	Non DE 2	9
CDS	RBM45 (4)	Non DE 3	12
CDS	RBM45 (4)	Non DE 4	6
CDS	RBM45 (4)	Non DE 5	17
CDS	RBM45 (4)	Non DE 6	16
CDS	RBM45 (7)	High TE	18
CDS	RBM45 (7)	Non DE 1	10
CDS	RBM45 (7)	Non DE 2	10
CDS	RBM45 (7)	Non DE 3	8
CDS	RBM45 (7)	Non DE 4	10
CDS	RBM45 (7)	Non DE 5	9
CDS	RBM45 (7)	Non DE 6	7
CDS	RBM46	High TE	8
CDS	RBM46	Non DE 1	9
CDS	RBM46	Non DE 2	7
CDS	RBM46	Non DE 3	8
CDS	RBM46	Non DE 4	6
CDS	RBM46	Non DE 5	9
CDS	RBM46	Non DE 6	12
CDS	RBM47 (2)	High TE	7
CDS	RBM47 (2)	Non DE 1	15
CDS	RBM47 (2)	Non DE 2	14
CDS	RBM47 (2)	Non DE 3	10
CDS	RBM47 (2)	Non DE 4	18
CDS	RBM47 (2)	Non DE 5	15
CDS	RBM47 (2)	Non DE 6	30
CDS	RBM4B (3)	High TE	15
CDS	RBM4B (3)	Non DE 1	17
CDS	RBM4B (3)	Non DE 2	15
CDS	RBM4B (3)	Non DE 3	9
CDS	RBM4B (3)	Non DE 4	14
CDS	RBM4B (3)	Non DE 5	22
CDS	RBM4B (3)	Non DE 6	19
CDS	RBM4B (4)	High TE	14
CDS	RBM4B (4)	Non DE 1	5
CDS	RBM4B (4)	Non DE 2	8
CDS	RBM4B (4)	Non DE 3	8
CDS	RBM4B (4)	Non DE 4	8
CDS	RBM4B (4)	Non DE 5	2
CDS	RBM4B (4)	Non DE 6	5
CDS	RBM5 (1)	High TE	47
CDS	RBM5 (1)	Non DE 1	60
CDS	RBM5 (1)	Non DE 2	39
CDS	RBM5 (1)	Non DE 3	49
CDS	RBM5 (1)	Non DE 4	46
CDS	RBM5 (1)	Non DE 5	59
CDS	RBM5 (1)	Non DE 6	43
CDS	RBM5 (2)	High TE	79
CDS	RBM5 (2)	Non DE 1	70
CDS	RBM5 (2)	Non DE 2	50
CDS	RBM5 (2)	Non DE 3	64
CDS	RBM5 (2)	Non DE 4	65
CDS	RBM5 (2)	Non DE 5	59
CDS	RBM5 (2)	Non DE 6	51
CDS	RBM6 (3)	High TE	9
CDS	RBM6 (3)	Non DE 1	13
CDS	RBM6 (3)	Non DE 2	7
CDS	RBM6 (3)	Non DE 3	8
CDS	RBM6 (3)	Non DE 4	4
CDS	RBM6 (3)	Non DE 5	7
CDS	RBM6 (3)	Non DE 6	11
CDS	RBM6 (4)	High TE	35
CDS	RBM6 (4)	Non DE 1	35
CDS	RBM6 (4)	Non DE 2	25
CDS	RBM6 (4)	Non DE 3	28
CDS	RBM6 (4)	Non DE 4	18
CDS	RBM6 (4)	Non DE 5	34
CDS	RBM6 (4)	Non DE 6	18
CDS	RBM6 (5)	High TE	18
CDS	RBM6 (5)	Non DE 1	22
CDS	RBM6 (5)	Non DE 2	28
CDS	RBM6 (5)	Non DE 3	20
CDS	RBM6 (5)	Non DE 4	21
CDS	RBM6 (5)	Non DE 5	25
CDS	RBM6 (5)	Non DE 6	19
CDS	RBMS2 (1)	High TE	8
CDS	RBMS2 (1)	Non DE 1	8
CDS	RBMS2 (1)	Non DE 2	6
CDS	RBMS2 (1)	Non DE 3	8
CDS	RBMS2 (1)	Non DE 4	8
CDS	RBMS2 (1)	Non DE 5	13
CDS	RBMS2 (1)	Non DE 6	15
CDS	RBMS3 (1)	High TE	7
CDS	RBMS3 (1)	Non DE 1	8
CDS	RBMS3 (1)	Non DE 2	8
CDS	RBMS3 (1)	Non DE 3	11
CDS	RBMS3 (1)	Non DE 4	5
CDS	RBMS3 (1)	Non DE 5	9
CDS	RBMS3 (1)	Non DE 6	13
CDS	RC3H1 (2)	High TE	8
CDS	RC3H1 (2)	Non DE 1	12
CDS	RC3H1 (2)	Non DE 2	17
CDS	RC3H1 (2)	Non DE 3	8
CDS	RC3H1 (2)	Non DE 4	11
CDS	RC3H1 (2)	Non DE 5	16
CDS	RC3H1 (2)	Non DE 6	20
CDS	RC3H1 (3)	High TE	29
CDS	RC3H1 (3)	Non DE 1	35
CDS	RC3H1 (3)	Non DE 2	36
CDS	RC3H1 (3)	Non DE 3	38
CDS	RC3H1 (3)	Non DE 4	31
CDS	RC3H1 (3)	Non DE 5	36
CDS	RC3H1 (3)	Non DE 6	41
CDS	RC3H1 (4)	High TE	12
CDS	RC3H1 (4)	Non DE 1	14
CDS	RC3H1 (4)	Non DE 2	16
CDS	RC3H1 (4)	Non DE 3	8
CDS	RC3H1 (4)	Non DE 4	14
CDS	RC3H1 (4)	Non DE 5	9
CDS	RC3H1 (4)	Non DE 6	11
CDS	RO3G00049	High TE	14
CDS	RO3G00049	Non DE 1	17
CDS	RO3G00049	Non DE 2	14
CDS	RO3G00049	Non DE 3	17
CDS	RO3G00049	Non DE 4	24
CDS	RO3G00049	Non DE 5	16
CDS	RO3G00049	Non DE 6	12
CDS	SAMD4A	High TE	120
CDS	SAMD4A	Non DE 1	90
CDS	SAMD4A	Non DE 2	112
CDS	SAMD4A	Non DE 3	97
CDS	SAMD4A	Non DE 4	60
CDS	SAMD4A	Non DE 5	104
CDS	SAMD4A	Non DE 6	86
CDS	SART3	High TE	59
CDS	SART3	Non DE 1	105
CDS	SART3	Non DE 2	58
CDS	SART3	Non DE 3	65
CDS	SART3	Non DE 4	82
CDS	SART3	Non DE 5	66
CDS	SART3	Non DE 6	87
CDS	SF1 (4)	High TE	10
CDS	SF1 (4)	Non DE 1	11
CDS	SF1 (4)	Non DE 2	10
CDS	SF1 (4)	Non DE 3	15
CDS	SF1 (4)	Non DE 4	9
CDS	SF1 (4)	Non DE 5	15
CDS	SF1 (4)	Non DE 6	13
CDS	SF2	High TE	135
CDS	SF2	Non DE 1	117
CDS	SF2	Non DE 2	77
CDS	SF2	Non DE 3	76
CDS	SF2	Non DE 4	89
CDS	SF2	Non DE 5	121
CDS	SF2	Non DE 6	92
CDS	SFPQ (2)	High TE	7
CDS	SFPQ (2)	Non DE 1	11
CDS	SFPQ (2)	Non DE 2	7
CDS	SFPQ (2)	Non DE 3	11
CDS	SFPQ (2)	Non DE 4	8
CDS	SFPQ (2)	Non DE 5	15
CDS	SFPQ (2)	Non DE 6	13
CDS	SFPQ (4)	High TE	31
CDS	SFPQ (4)	Non DE 1	23
CDS	SFPQ (4)	Non DE 2	31
CDS	SFPQ (4)	Non DE 3	28
CDS	SFPQ (4)	Non DE 4	25
CDS	SFPQ (4)	Non DE 5	39
CDS	SFPQ (4)	Non DE 6	27
CDS	SFPQ (5)	High TE	37
CDS	SFPQ (5)	Non DE 1	24
CDS	SFPQ (5)	Non DE 2	27
CDS	SFPQ (5)	Non DE 3	25
CDS	SFPQ (5)	Non DE 4	19
CDS	SFPQ (5)	Non DE 5	56
CDS	SFPQ (5)	Non DE 6	34
CDS	SNRNP70	High TE	32
CDS	SNRNP70	Non DE 1	16
CDS	SNRNP70	Non DE 2	21
CDS	SNRNP70	Non DE 3	24
CDS	SNRNP70	Non DE 4	23
CDS	SNRNP70	Non DE 5	22
CDS	SNRNP70	Non DE 6	18
CDS	SNRPA (1)	High TE	17
CDS	SNRPA (1)	Non DE 1	18
CDS	SNRPA (1)	Non DE 2	19
CDS	SNRPA (1)	Non DE 3	10
CDS	SNRPA (1)	Non DE 4	11
CDS	SNRPA (1)	Non DE 5	11
CDS	SNRPA (1)	Non DE 6	14
CDS	SNRPA (2)	High TE	15
CDS	SNRPA (2)	Non DE 1	17
CDS	SNRPA (2)	Non DE 2	19
CDS	SNRPA (2)	Non DE 3	13
CDS	SNRPA (2)	Non DE 4	14
CDS	SNRPA (2)	Non DE 5	22
CDS	SNRPA (2)	Non DE 6	11
CDS	SNRPA (3)	High TE	18
CDS	SNRPA (3)	Non DE 1	12
CDS	SNRPA (3)	Non DE 2	14
CDS	SNRPA (3)	Non DE 3	10
CDS	SNRPA (3)	Non DE 4	6
CDS	SNRPA (3)	Non DE 5	13
CDS	SNRPA (3)	Non DE 6	14
CDS	SNRPA (4)	High TE	7
CDS	SNRPA (4)	Non DE 1	13
CDS	SNRPA (4)	Non DE 2	6
CDS	SNRPA (4)	Non DE 3	7
CDS	SNRPA (4)	Non DE 4	8
CDS	SNRPA (4)	Non DE 5	2
CDS	SNRPA (4)	Non DE 6	12
CDS	SNRPA (5)	High TE	7
CDS	SNRPA (5)	Non DE 1	13
CDS	SNRPA (5)	Non DE 2	6
CDS	SNRPA (5)	Non DE 3	7
CDS	SNRPA (5)	Non DE 4	8
CDS	SNRPA (5)	Non DE 5	2
CDS	SNRPA (5)	Non DE 6	12
CDS	SNRPA (6)	High TE	58
CDS	SNRPA (6)	Non DE 1	36
CDS	SNRPA (6)	Non DE 2	28
CDS	SNRPA (6)	Non DE 3	40
CDS	SNRPA (6)	Non DE 4	36
CDS	SNRPA (6)	Non DE 5	39
CDS	SNRPA (6)	Non DE 6	34
CDS	SRSF1 (1)	High TE	63
CDS	SRSF1 (1)	Non DE 1	44
CDS	SRSF1 (1)	Non DE 2	43
CDS	SRSF1 (1)	Non DE 3	37
CDS	SRSF1 (1)	Non DE 4	40
CDS	SRSF1 (1)	Non DE 5	41
CDS	SRSF1 (1)	Non DE 6	35
CDS	SRSF1 (2)	High TE	106
CDS	SRSF1 (2)	Non DE 1	117
CDS	SRSF1 (2)	Non DE 2	91
CDS	SRSF1 (2)	Non DE 3	90
CDS	SRSF1 (2)	Non DE 4	98
CDS	SRSF1 (2)	Non DE 5	95
CDS	SRSF1 (2)	Non DE 6	100
CDS	SRSF1 (3)	High TE	209
CDS	SRSF1 (3)	Non DE 1	205
CDS	SRSF1 (3)	Non DE 2	146
CDS	SRSF1 (3)	Non DE 3	154
CDS	SRSF1 (3)	Non DE 4	150
CDS	SRSF1 (3)	Non DE 5	184
CDS	SRSF1 (3)	Non DE 6	168
CDS	SRSF1 (4)	High TE	43
CDS	SRSF1 (4)	Non DE 1	73
CDS	SRSF1 (4)	Non DE 2	48
CDS	SRSF1 (4)	Non DE 3	53
CDS	SRSF1 (4)	Non DE 4	58
CDS	SRSF1 (4)	Non DE 5	54
CDS	SRSF1 (4)	Non DE 6	65
CDS	SRSF1 (5)	High TE	166
CDS	SRSF1 (5)	Non DE 1	132
CDS	SRSF1 (5)	Non DE 2	98
CDS	SRSF1 (5)	Non DE 3	101
CDS	SRSF1 (5)	Non DE 4	92
CDS	SRSF1 (5)	Non DE 5	130
CDS	SRSF1 (5)	Non DE 6	103
CDS	SRSF10 (1)	High TE	68
CDS	SRSF10 (1)	Non DE 1	74
CDS	SRSF10 (1)	Non DE 2	91
CDS	SRSF10 (1)	Non DE 3	69
CDS	SRSF10 (1)	Non DE 4	80
CDS	SRSF10 (1)	Non DE 5	112
CDS	SRSF10 (1)	Non DE 6	70
CDS	SRSF10 (2)	High TE	16
CDS	SRSF10 (2)	Non DE 1	18
CDS	SRSF10 (2)	Non DE 2	15
CDS	SRSF10 (2)	Non DE 3	15
CDS	SRSF10 (2)	Non DE 4	11
CDS	SRSF10 (2)	Non DE 5	13
CDS	SRSF10 (2)	Non DE 6	10
CDS	SRSF11 (1)	High TE	53
CDS	SRSF11 (1)	Non DE 1	51
CDS	SRSF11 (1)	Non DE 2	27
CDS	SRSF11 (1)	Non DE 3	36
CDS	SRSF11 (1)	Non DE 4	36
CDS	SRSF11 (1)	Non DE 5	50
CDS	SRSF11 (1)	Non DE 6	42
CDS	SRSF11 (2)	High TE	23
CDS	SRSF11 (2)	Non DE 1	44
CDS	SRSF11 (2)	Non DE 2	35
CDS	SRSF11 (2)	Non DE 3	33
CDS	SRSF11 (2)	Non DE 4	39
CDS	SRSF11 (2)	Non DE 5	31
CDS	SRSF11 (2)	Non DE 6	40
CDS	SRSF2 (1)	High TE	68
CDS	SRSF2 (1)	Non DE 1	74
CDS	SRSF2 (1)	Non DE 2	91
CDS	SRSF2 (1)	Non DE 3	69
CDS	SRSF2 (1)	Non DE 4	80
CDS	SRSF2 (1)	Non DE 5	112
CDS	SRSF2 (1)	Non DE 6	70
CDS	SRSF2 (2)	High TE	34
CDS	SRSF2 (2)	Non DE 1	37
CDS	SRSF2 (2)	Non DE 2	22
CDS	SRSF2 (2)	Non DE 3	25
CDS	SRSF2 (2)	Non DE 4	25
CDS	SRSF2 (2)	Non DE 5	38
CDS	SRSF2 (2)	Non DE 6	26
CDS	SRSF2 (3)	High TE	21
CDS	SRSF2 (3)	Non DE 1	24
CDS	SRSF2 (3)	Non DE 2	22
CDS	SRSF2 (3)	Non DE 3	17
CDS	SRSF2 (3)	Non DE 4	23
CDS	SRSF2 (3)	Non DE 5	18
CDS	SRSF2 (3)	Non DE 6	28
CDS	SRSF2 (4)	High TE	40
CDS	SRSF2 (4)	Non DE 1	70
CDS	SRSF2 (4)	Non DE 2	54
CDS	SRSF2 (4)	Non DE 3	56
CDS	SRSF2 (4)	Non DE 4	59
CDS	SRSF2 (4)	Non DE 5	56
CDS	SRSF2 (4)	Non DE 6	70
CDS	SRSF4 (1)	High TE	69
CDS	SRSF4 (1)	Non DE 1	83
CDS	SRSF4 (1)	Non DE 2	85
CDS	SRSF4 (1)	Non DE 3	77
CDS	SRSF4 (1)	Non DE 4	80
CDS	SRSF4 (1)	Non DE 5	80
CDS	SRSF4 (1)	Non DE 6	76
CDS	SRSF4 (2)	High TE	62
CDS	SRSF4 (2)	Non DE 1	56
CDS	SRSF4 (2)	Non DE 2	67
CDS	SRSF4 (2)	Non DE 3	67
CDS	SRSF4 (2)	Non DE 4	65
CDS	SRSF4 (2)	Non DE 5	65
CDS	SRSF4 (2)	Non DE 6	53
CDS	SRSF4 (3)	High TE	16
CDS	SRSF4 (3)	Non DE 1	12
CDS	SRSF4 (3)	Non DE 2	13
CDS	SRSF4 (3)	Non DE 3	16
CDS	SRSF4 (3)	Non DE 4	12
CDS	SRSF4 (3)	Non DE 5	21
CDS	SRSF4 (3)	Non DE 6	12
CDS	SRSF5 (1)	High TE	22
CDS	SRSF5 (1)	Non DE 1	18
CDS	SRSF5 (1)	Non DE 2	19
CDS	SRSF5 (1)	Non DE 3	20
CDS	SRSF5 (1)	Non DE 4	11
CDS	SRSF5 (1)	Non DE 5	23
CDS	SRSF5 (1)	Non DE 6	20
CDS	SRSF5 (2)	High TE	19
CDS	SRSF5 (2)	Non DE 1	28
CDS	SRSF5 (2)	Non DE 2	25
CDS	SRSF5 (2)	Non DE 3	24
[truncated: 2,131 more rows]

[truncated: 6 more sheets: Supplementary file_11, Supplementary file_12, Supplementary file_13, Supplementary file_14, Supplementary file_15, Supplementary file_16]
